# Supplementary material
Source: PubMed Central journal article supplement (PMC6641513)
Supplement: ao7b00457_si_001.pdf [file ao7b00457_si_001.pdf]

## Supporting Information (SI)

for

### Synthesis and Structural Analysis of Palladium(II) Complexes Containing Neutral or Anionic C<sub>2</sub>-Symmetric Bis(oxazoline) Ligands: Effects of Substituents in the 5 Position

Ken Tsutsumi,<sup>†</sup> Koji Itagaki,<sup>‡</sup> and Kotohiro Nomura<sup>\*,†,‡</sup>

<sup>†</sup>*Department of Chemistry, Faculty of Science and Engineering, Tokyo Metropolitan*

*University, 1-1 Minami Osawa, Hachioji, Tokyo 192-0397, Japan*

<sup>‡</sup>*Graduate School of Materials Science, Nara Institute of Science and Technology (NAIST),*

*Takayama, Ikoma, Nara 630-0192, Japan*

#### Contents

1. NMR spectra of amino alcohol (**6a**, **6c**, **Figure S1,S2**), bisamide alcohol (**7a**, **Figure S3,S4**), BOX (**1a-c**, **Figure S5-S10**), neutral (BOX)PdCl<sub>2</sub> (**2a-d**, **Figure S11-S18**), neutral (BOX)PdMeCl (**3a-d**, **Figure S19-S26**), cationic [(BOX)PdMe(2,6-Me<sub>2</sub>C<sub>5</sub>H<sub>3</sub>N)]<sup>+</sup>PF<sub>6</sub><sup>-</sup> (**4a-d**, **Figure S27-S34**), and neutral (BOX)PdMe(2,6-Me<sub>2</sub>C<sub>5</sub>H<sub>3</sub>N) (**5b-d**, **Figure S35-S39**).
2. Selected crystal collection parameters for BOX (**1b-d**), complex **2a-d**, **3a**, **3c**, **4a**, **5b**.

<sup>a</sup>Tokyo Metropolitan University.

<sup>b</sup>Nara Institute of Science and Technology (NAIST).

\*Corresponding Author, tel.: +81-42-677-2547, fax: +81-42-677-2547, e-mail:

ktnomura@tmu.ac.jp

1-1. NMR spectra of amino alcohol (6a, 6c).

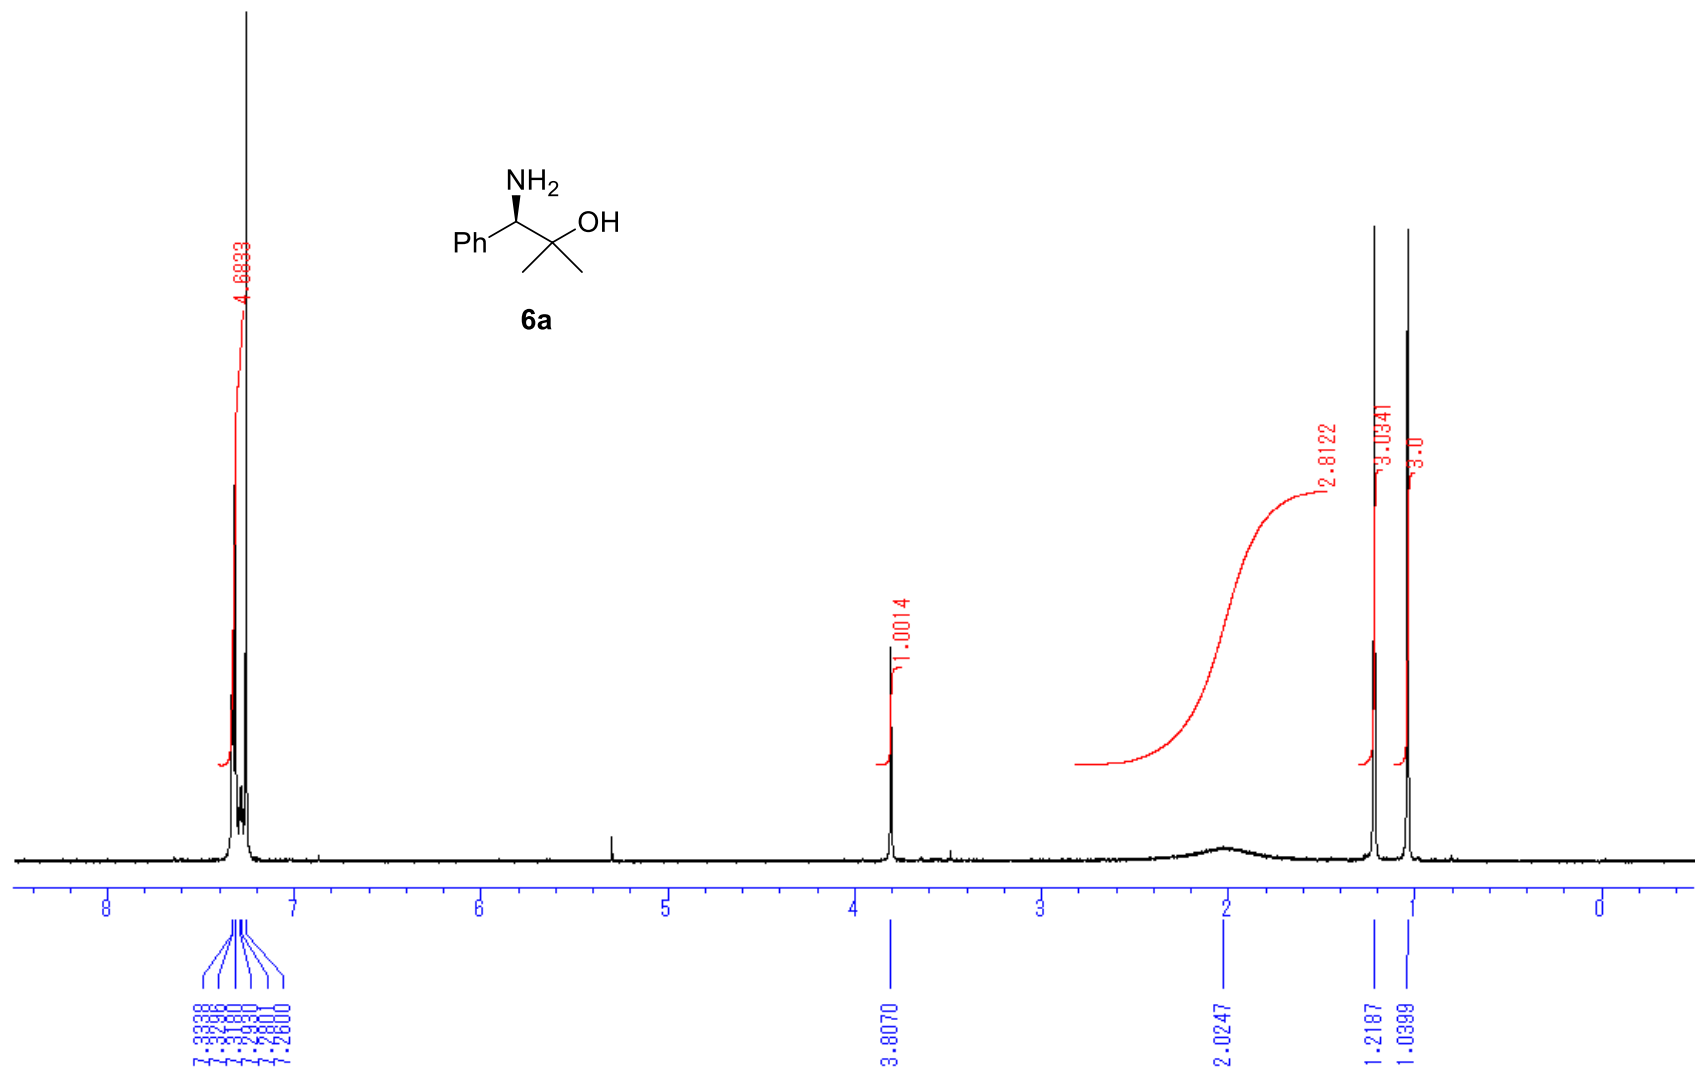

Figure S1. <sup>1</sup>H NMR Spectrum of amino alcohol (6a).

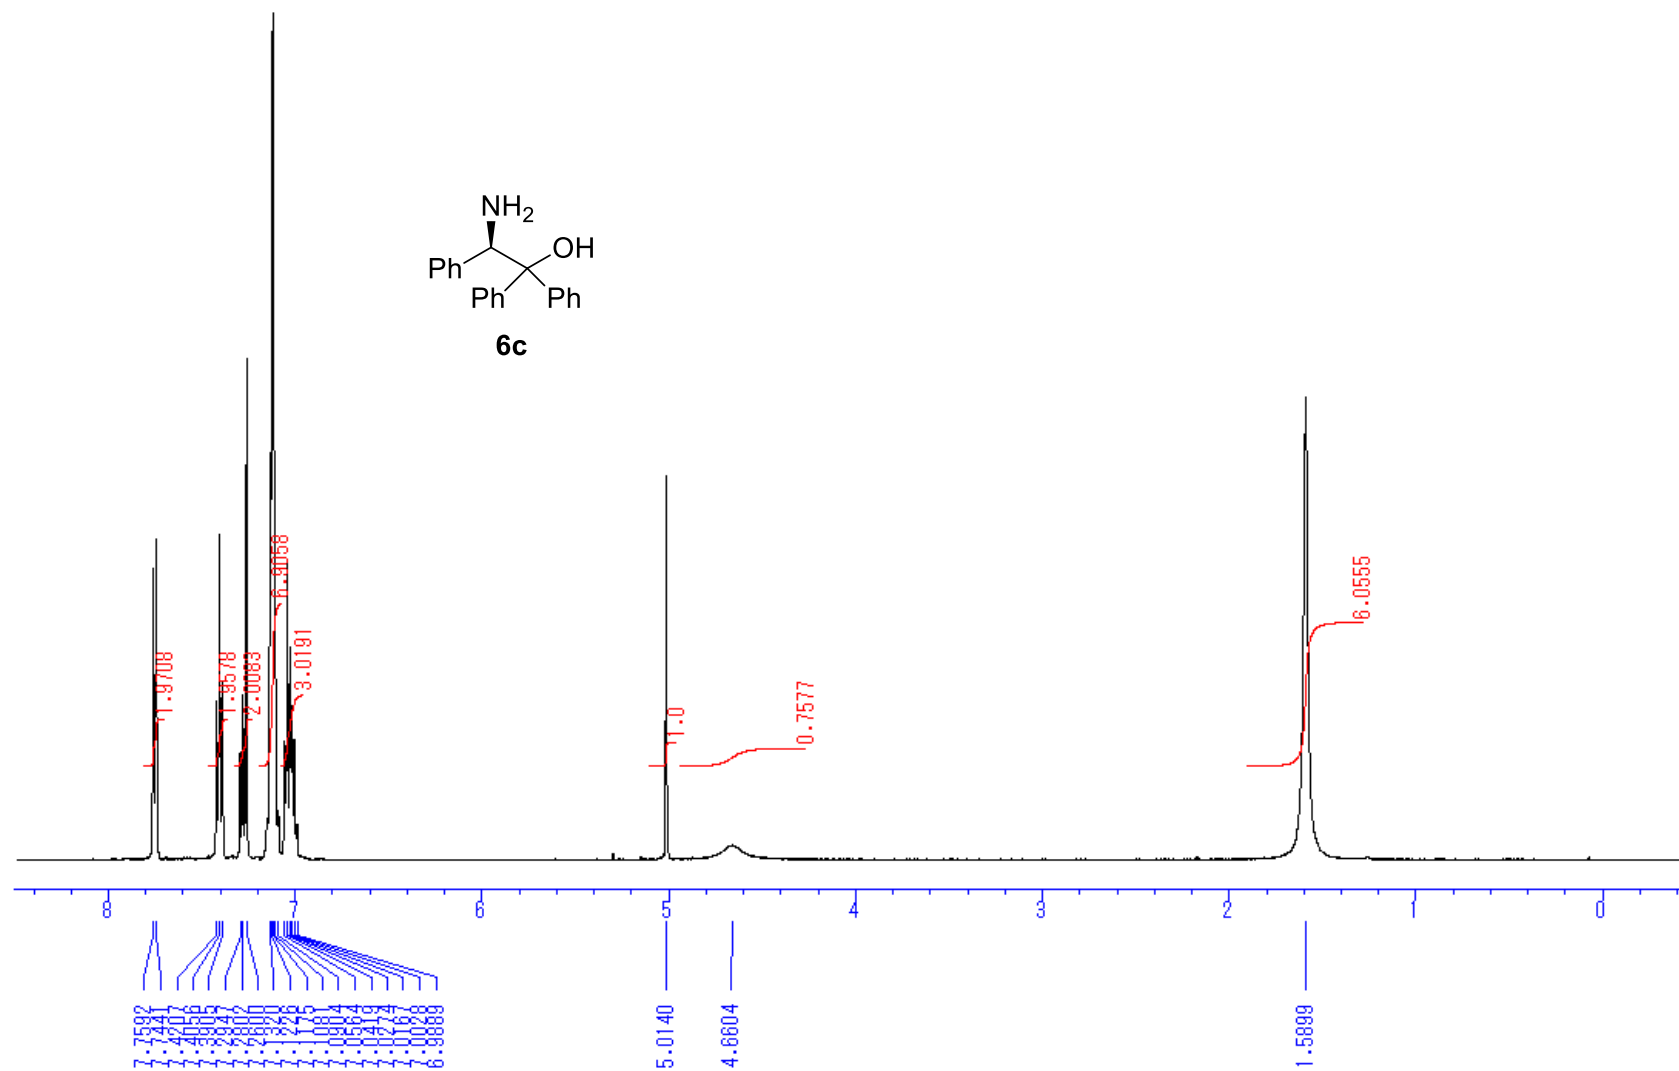

Figure S2. <sup>1</sup>H NMR Spectrum of amino alcohol (6c).

1-2. NMR spectra of bisamide alcohol (7a).

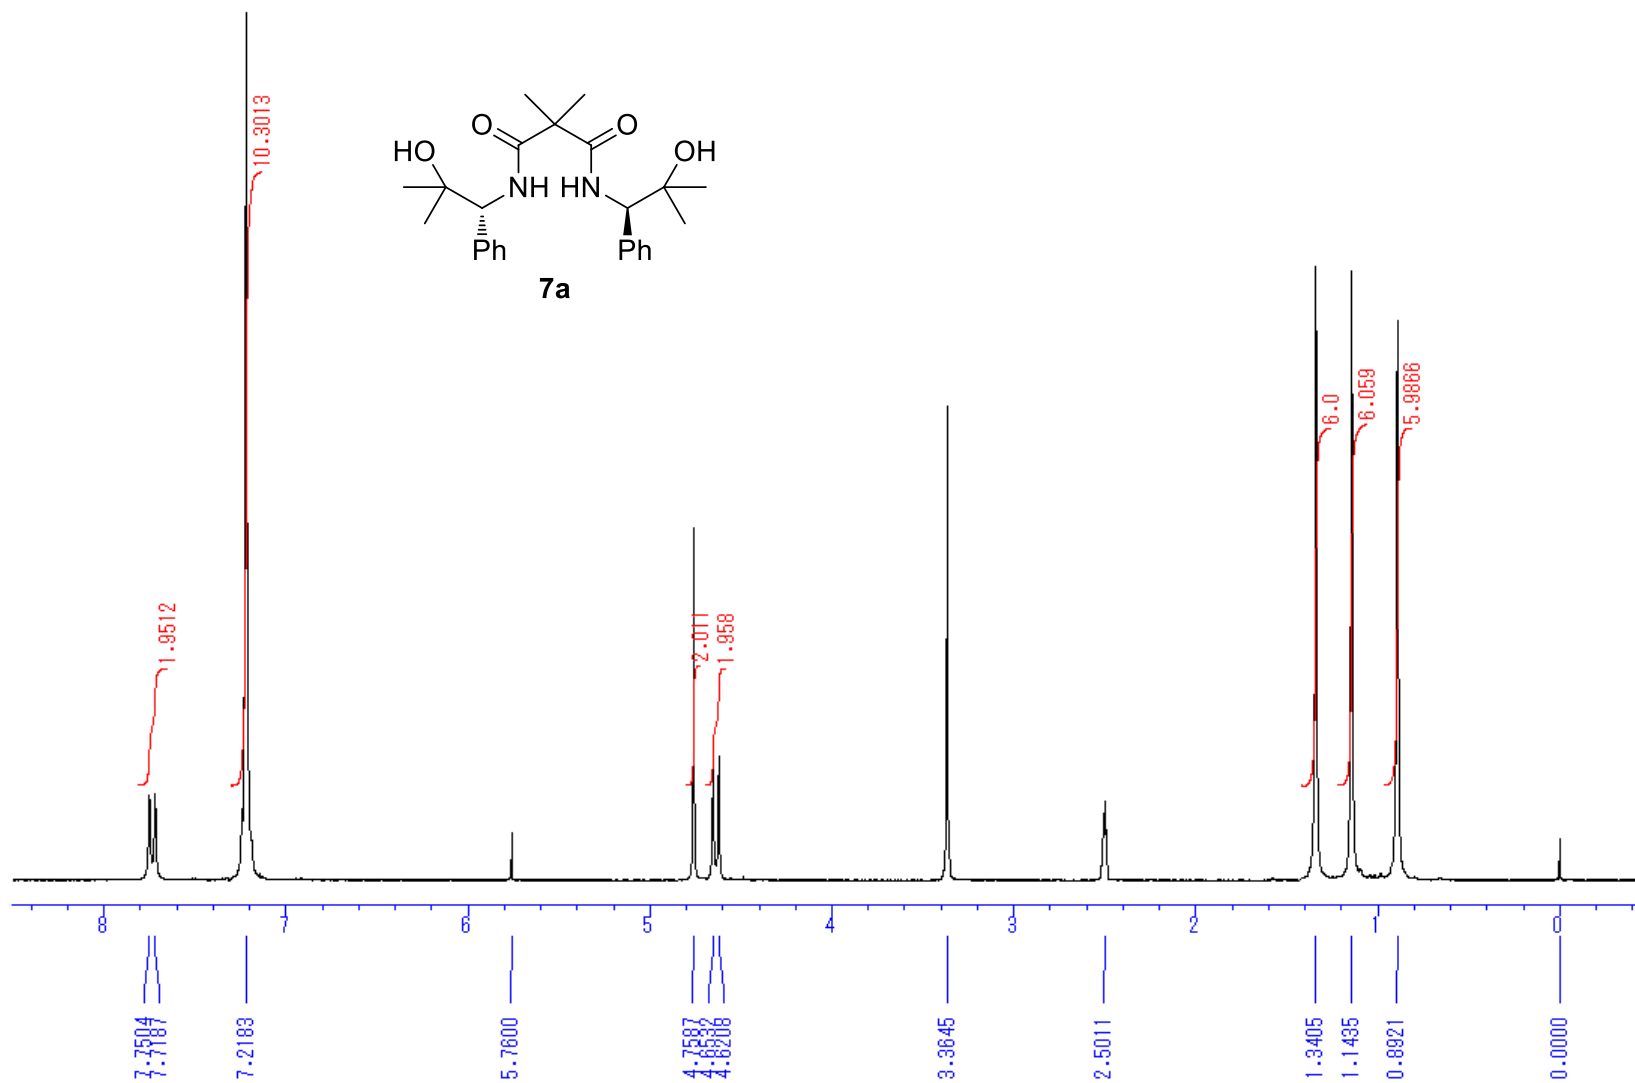

Figure S3. <sup>1</sup>H NMR Spectrum of bisamide alcohol (7a).

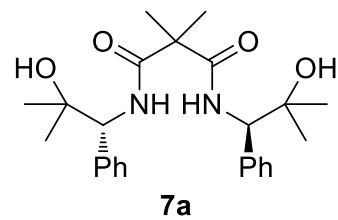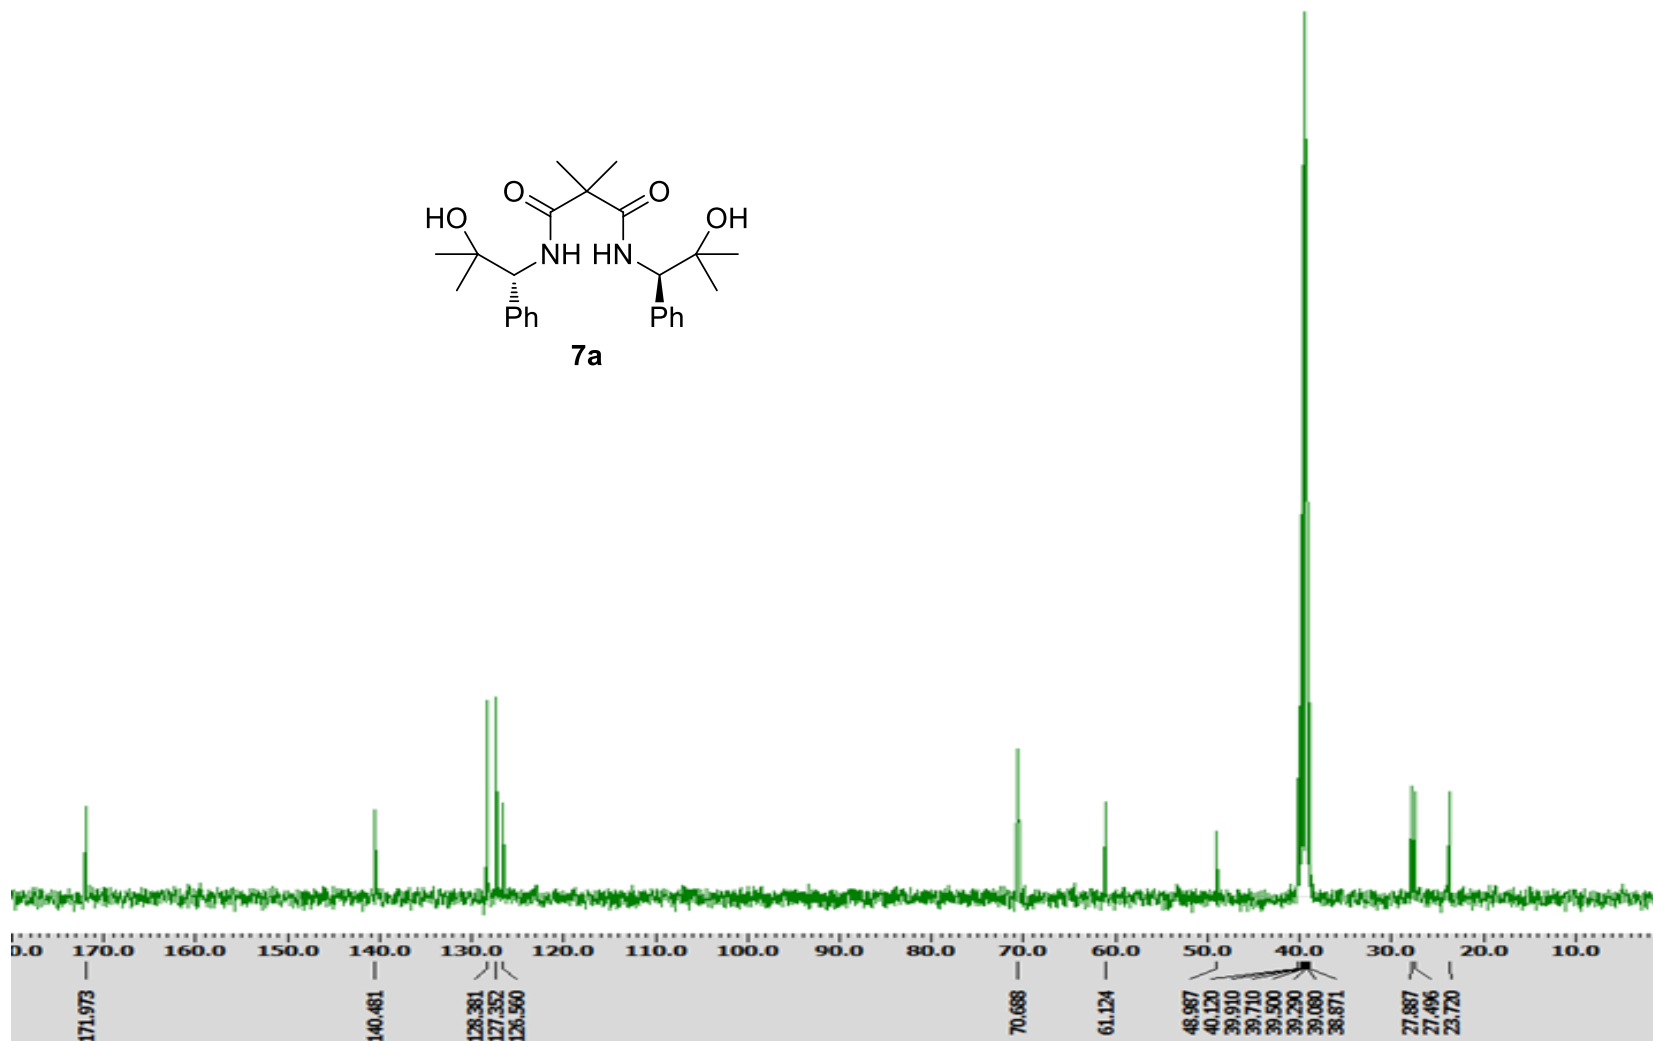

Figure S4.  $^{13}\text{C}$  NMR Spectrum of bisamide alcohol (7a).

1-3. NMR spectra of BOX (1a-c).

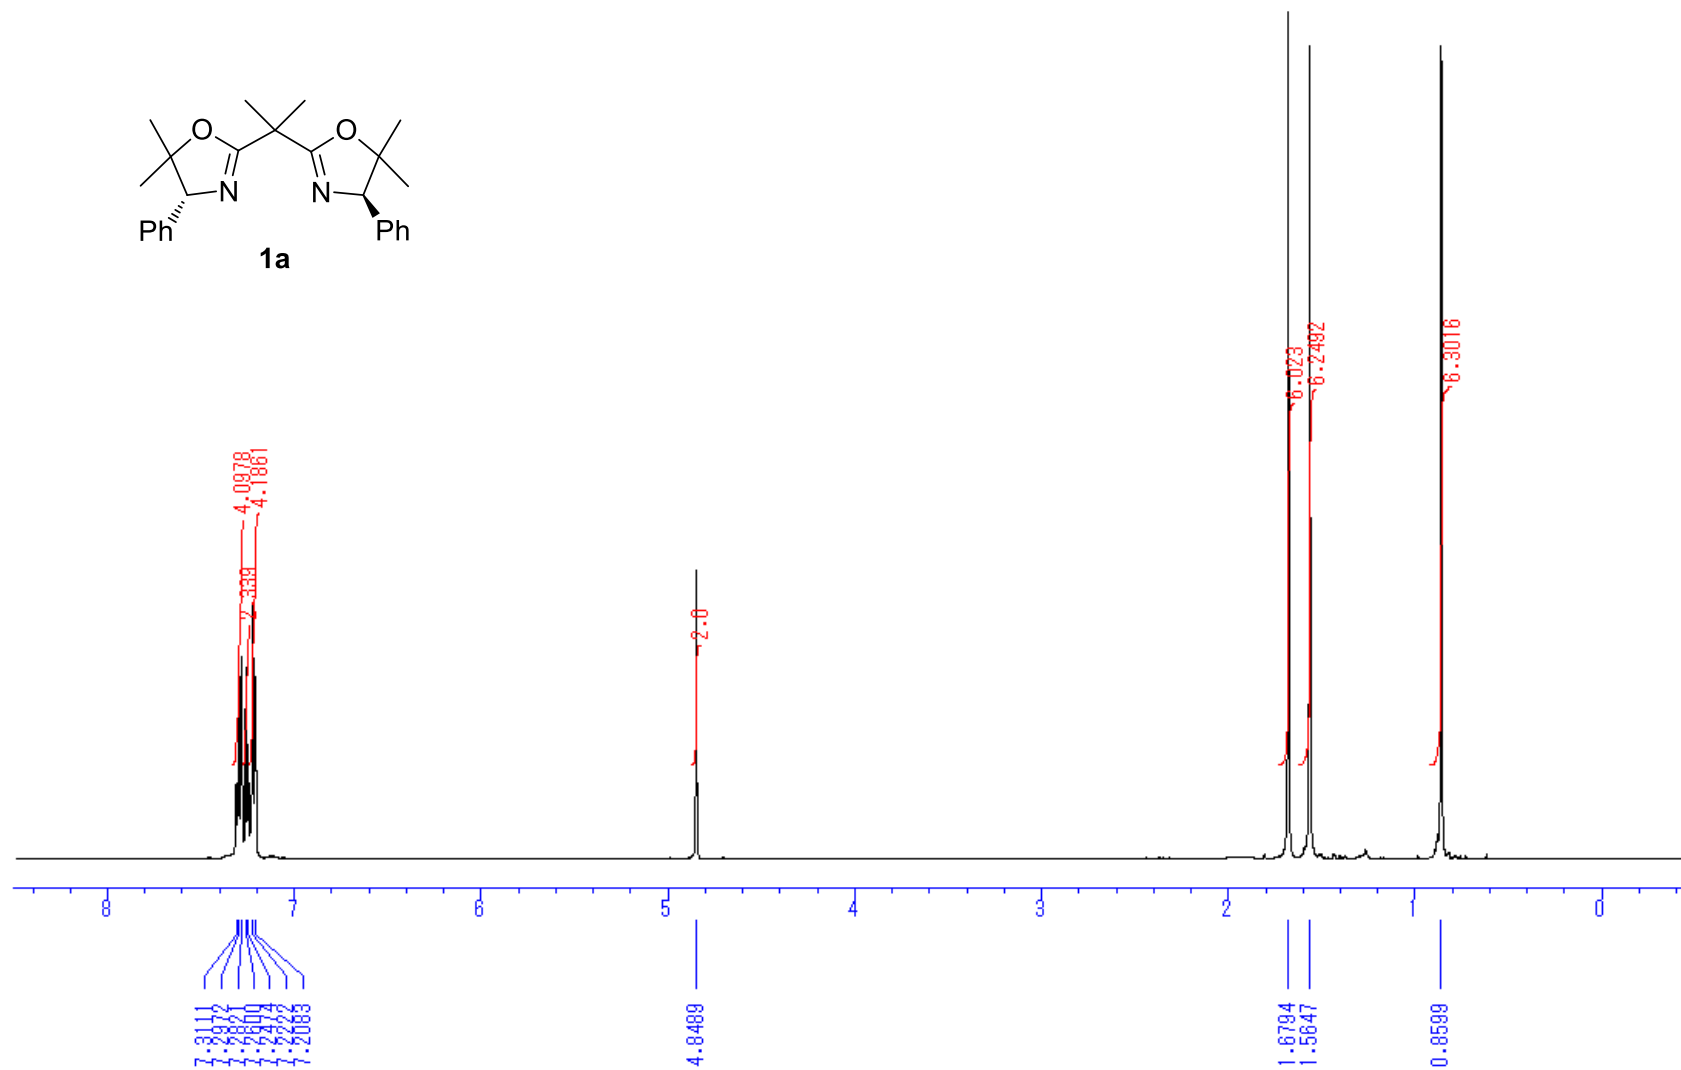

Figure S5. <sup>1</sup>H NMR Spectrum of BOX (1a).

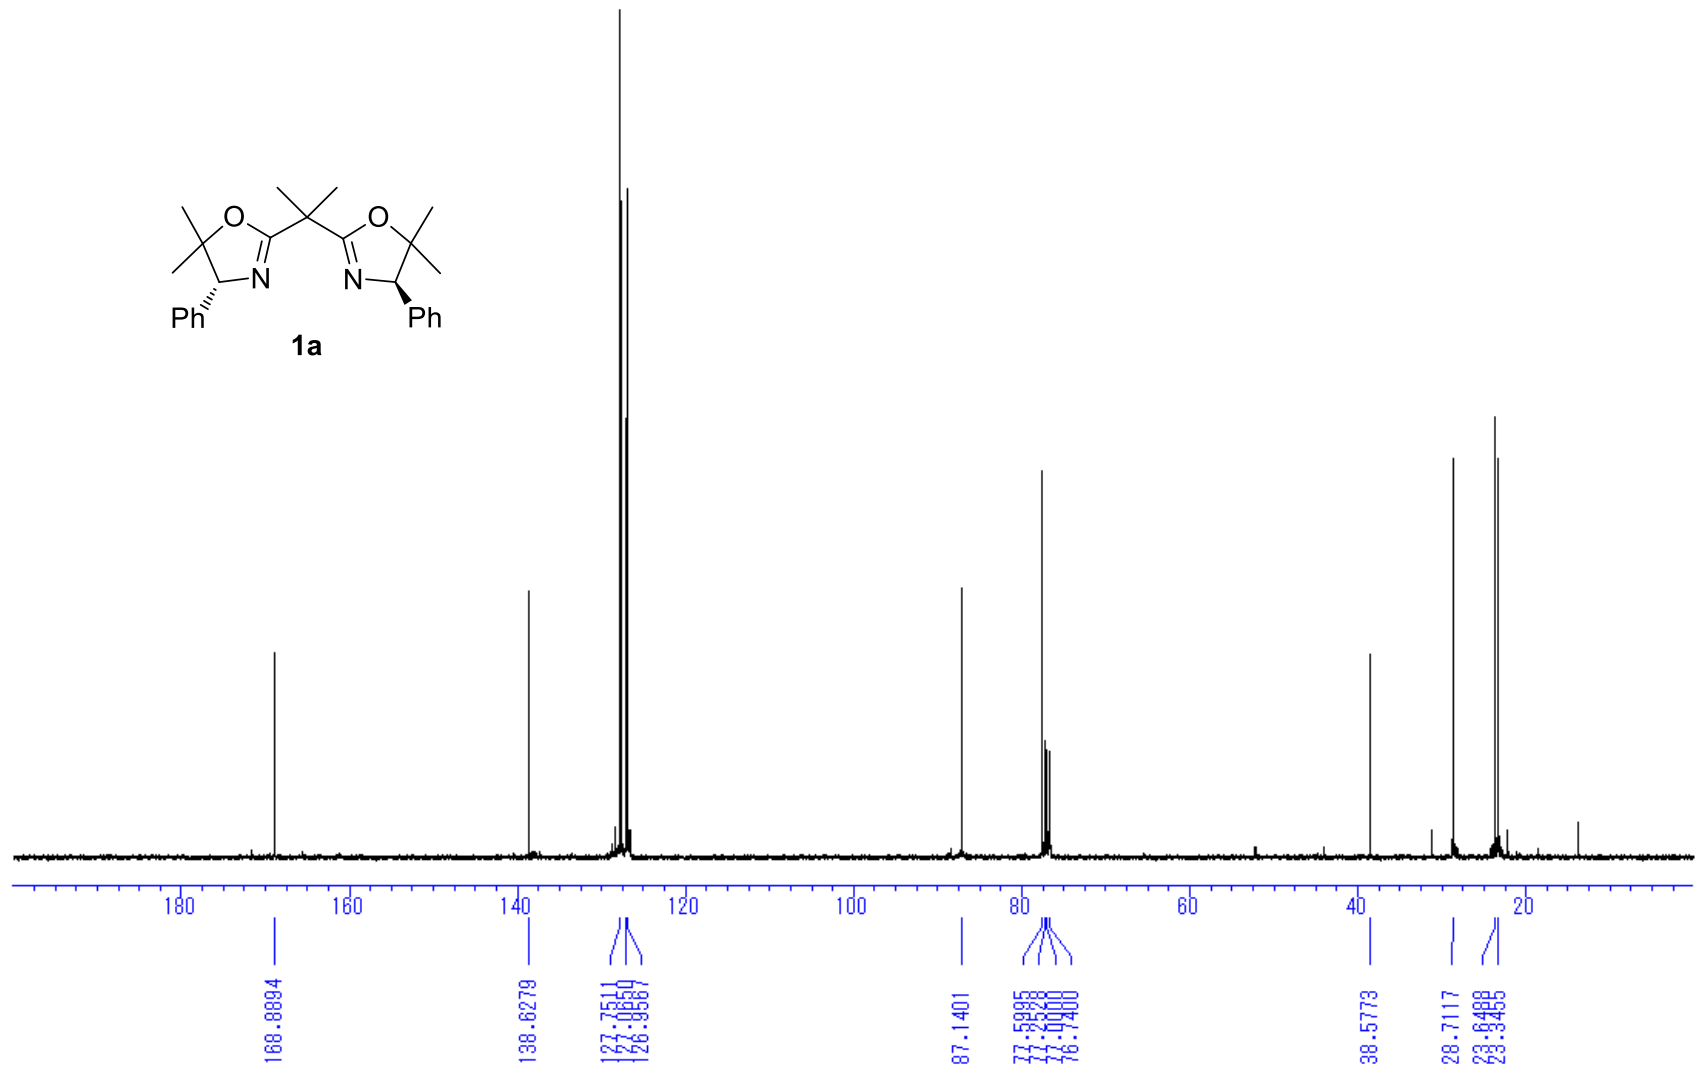

Figure S6. <sup>13</sup>C NMR Spectrum of BOX (1a).

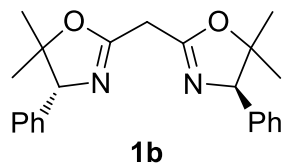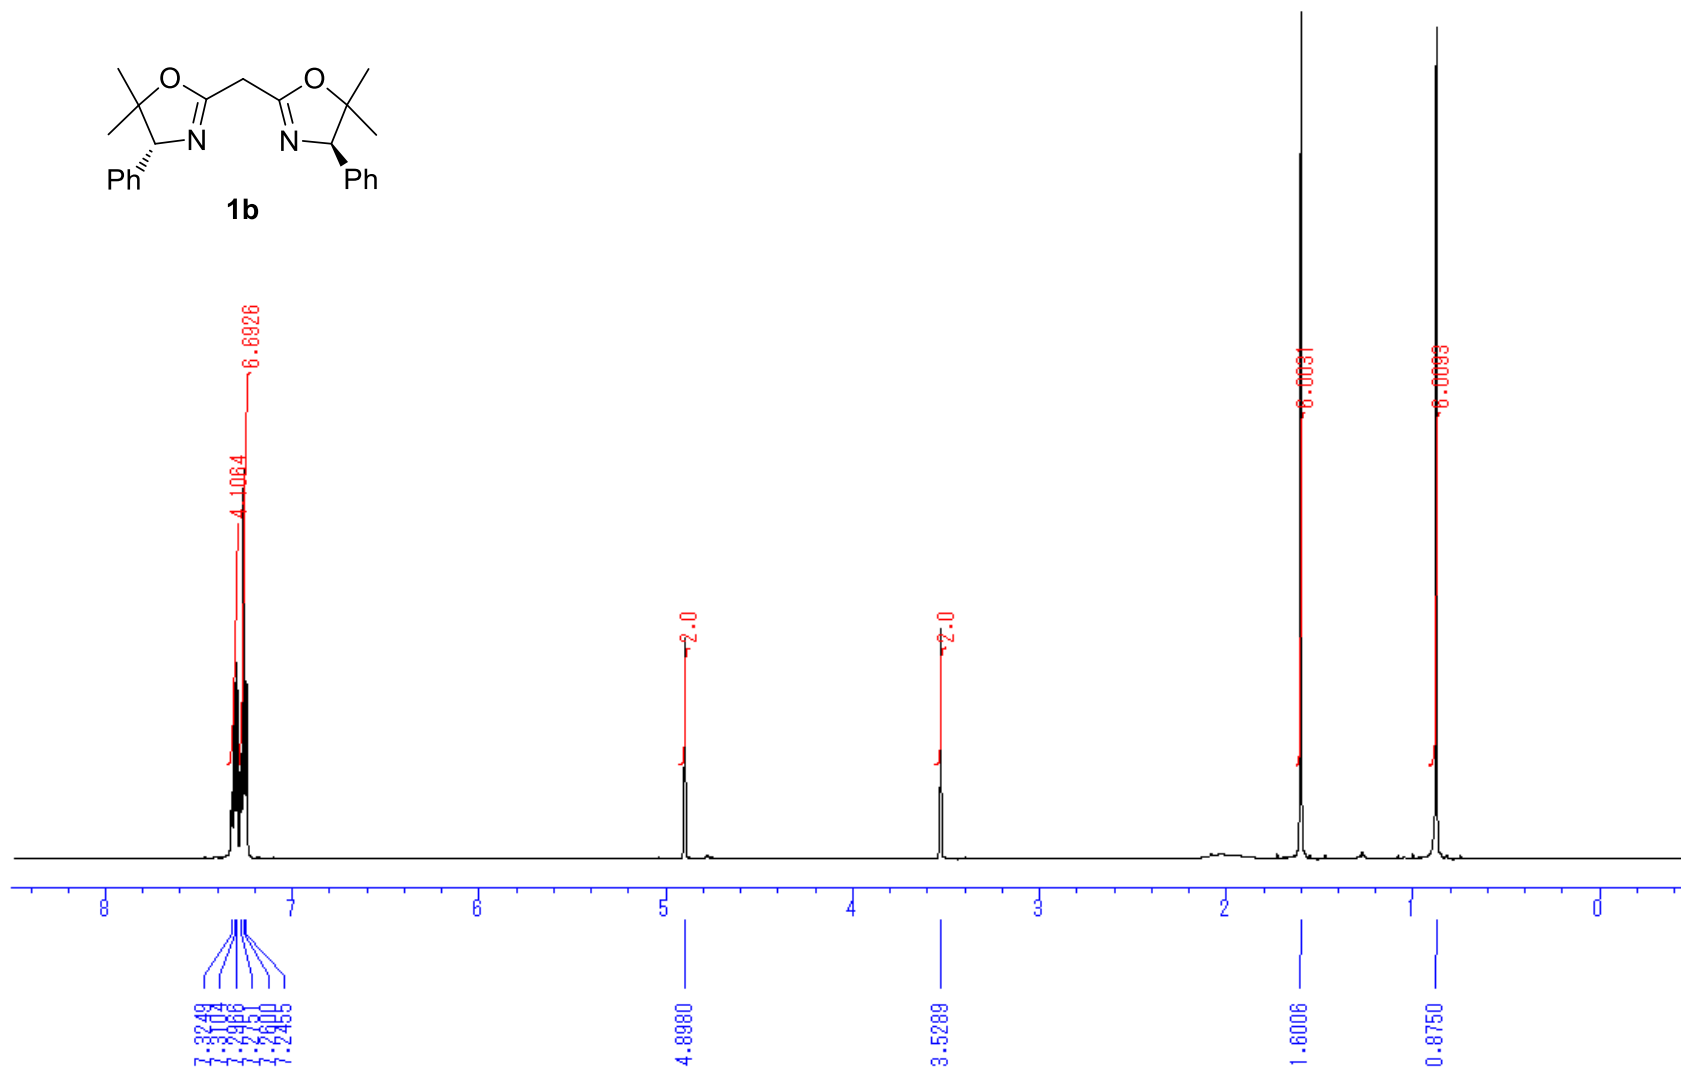

Figure S7. <sup>1</sup>H NMR Spectrum of BOX (1b).



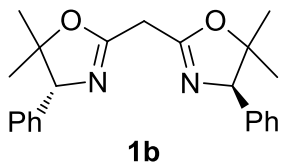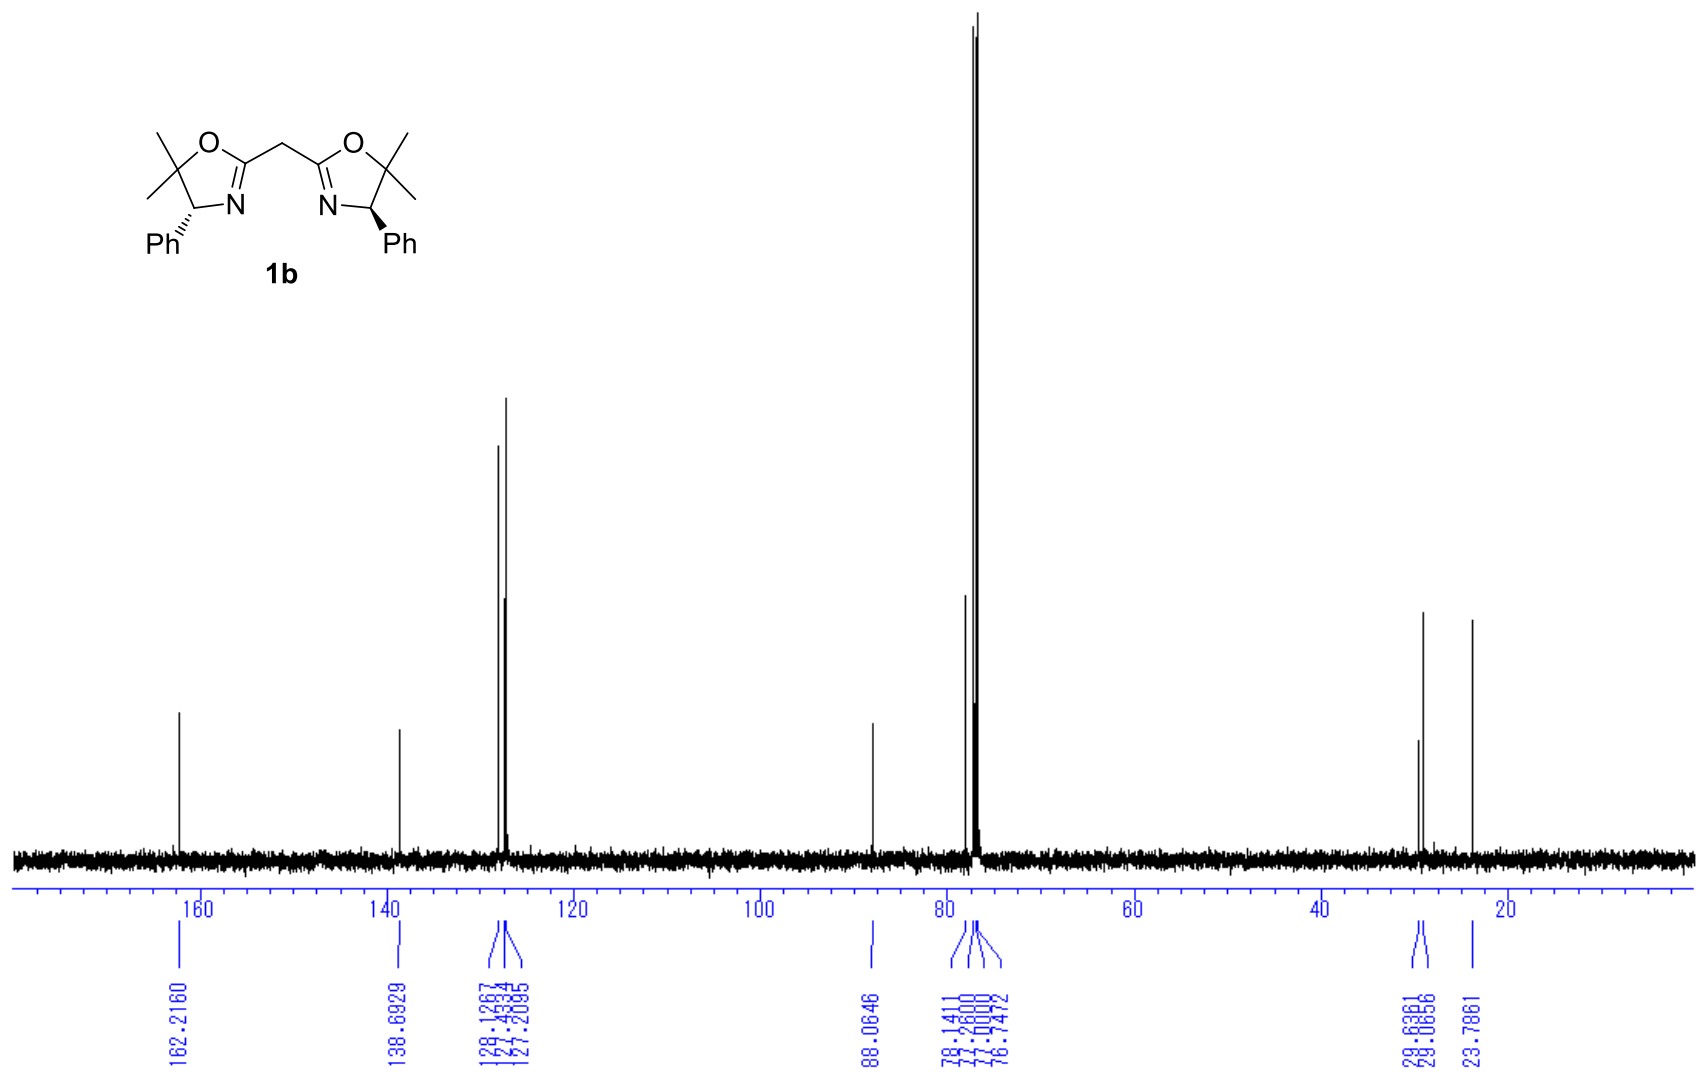

Figure S8. <sup>13</sup>C NMR Spectrum of BOX (1b).

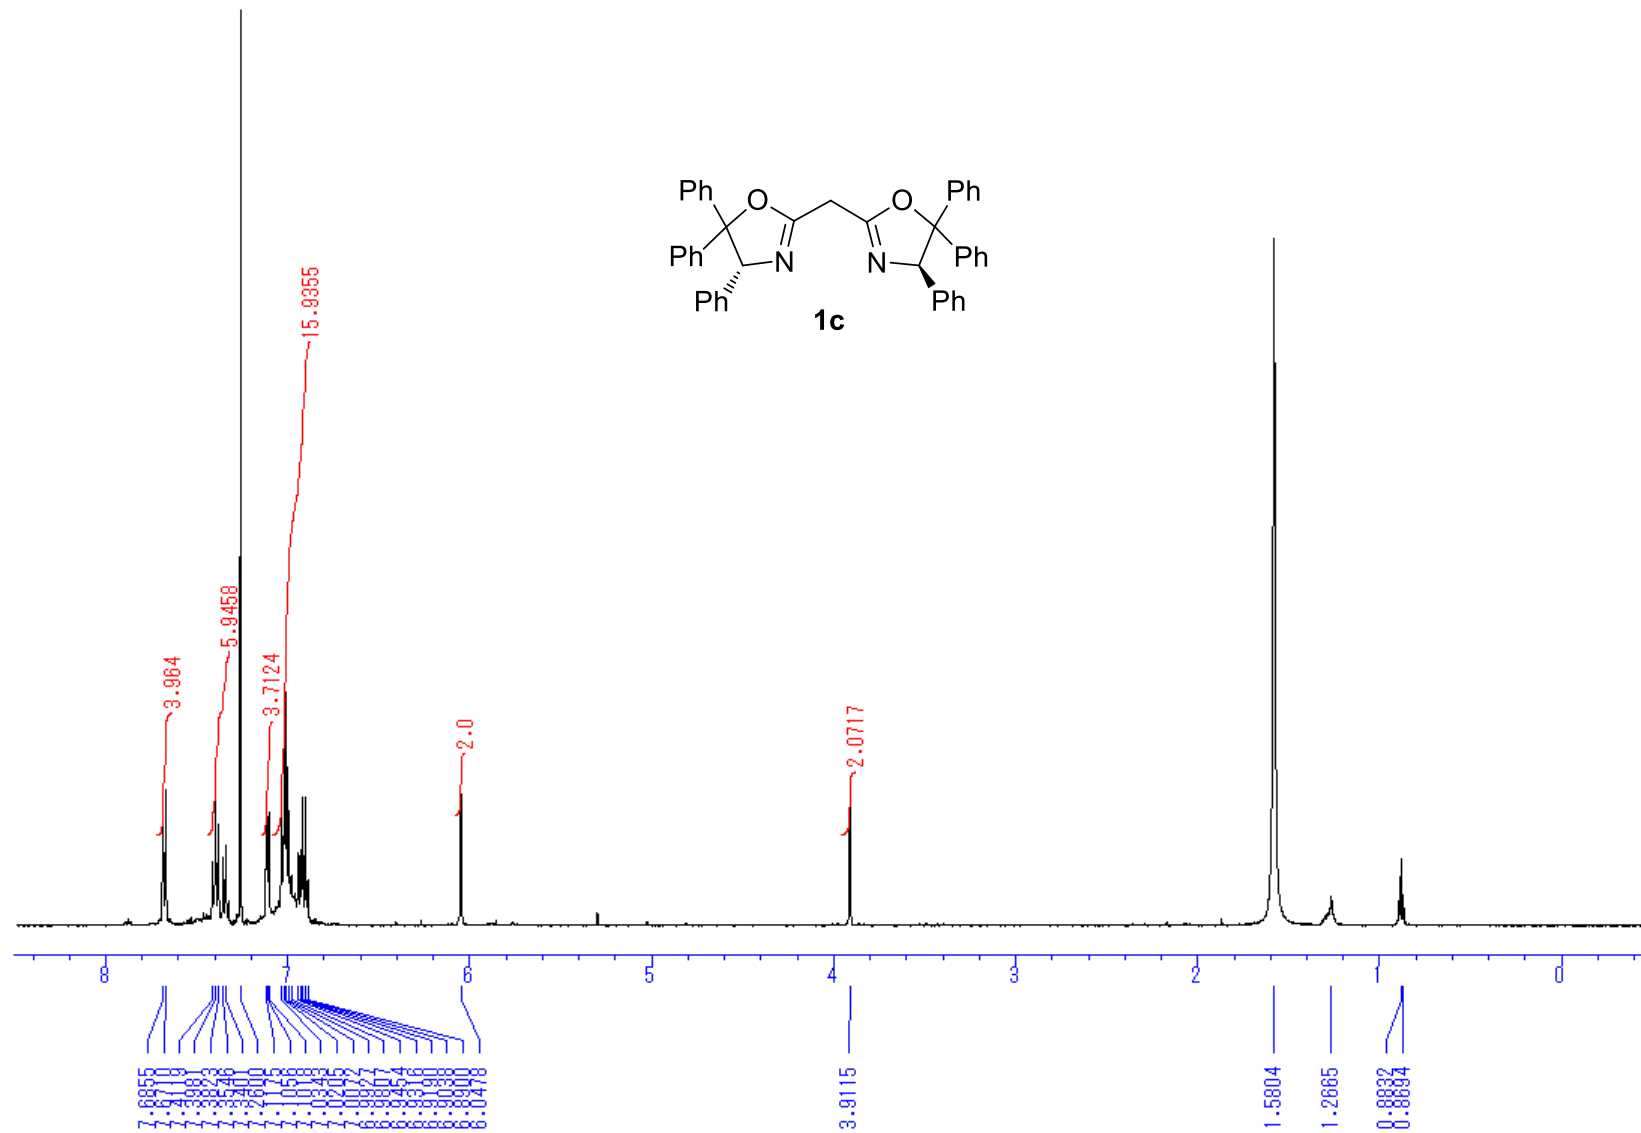

Figure S9. <sup>1</sup>H NMR Spectrum of BOX (1c).

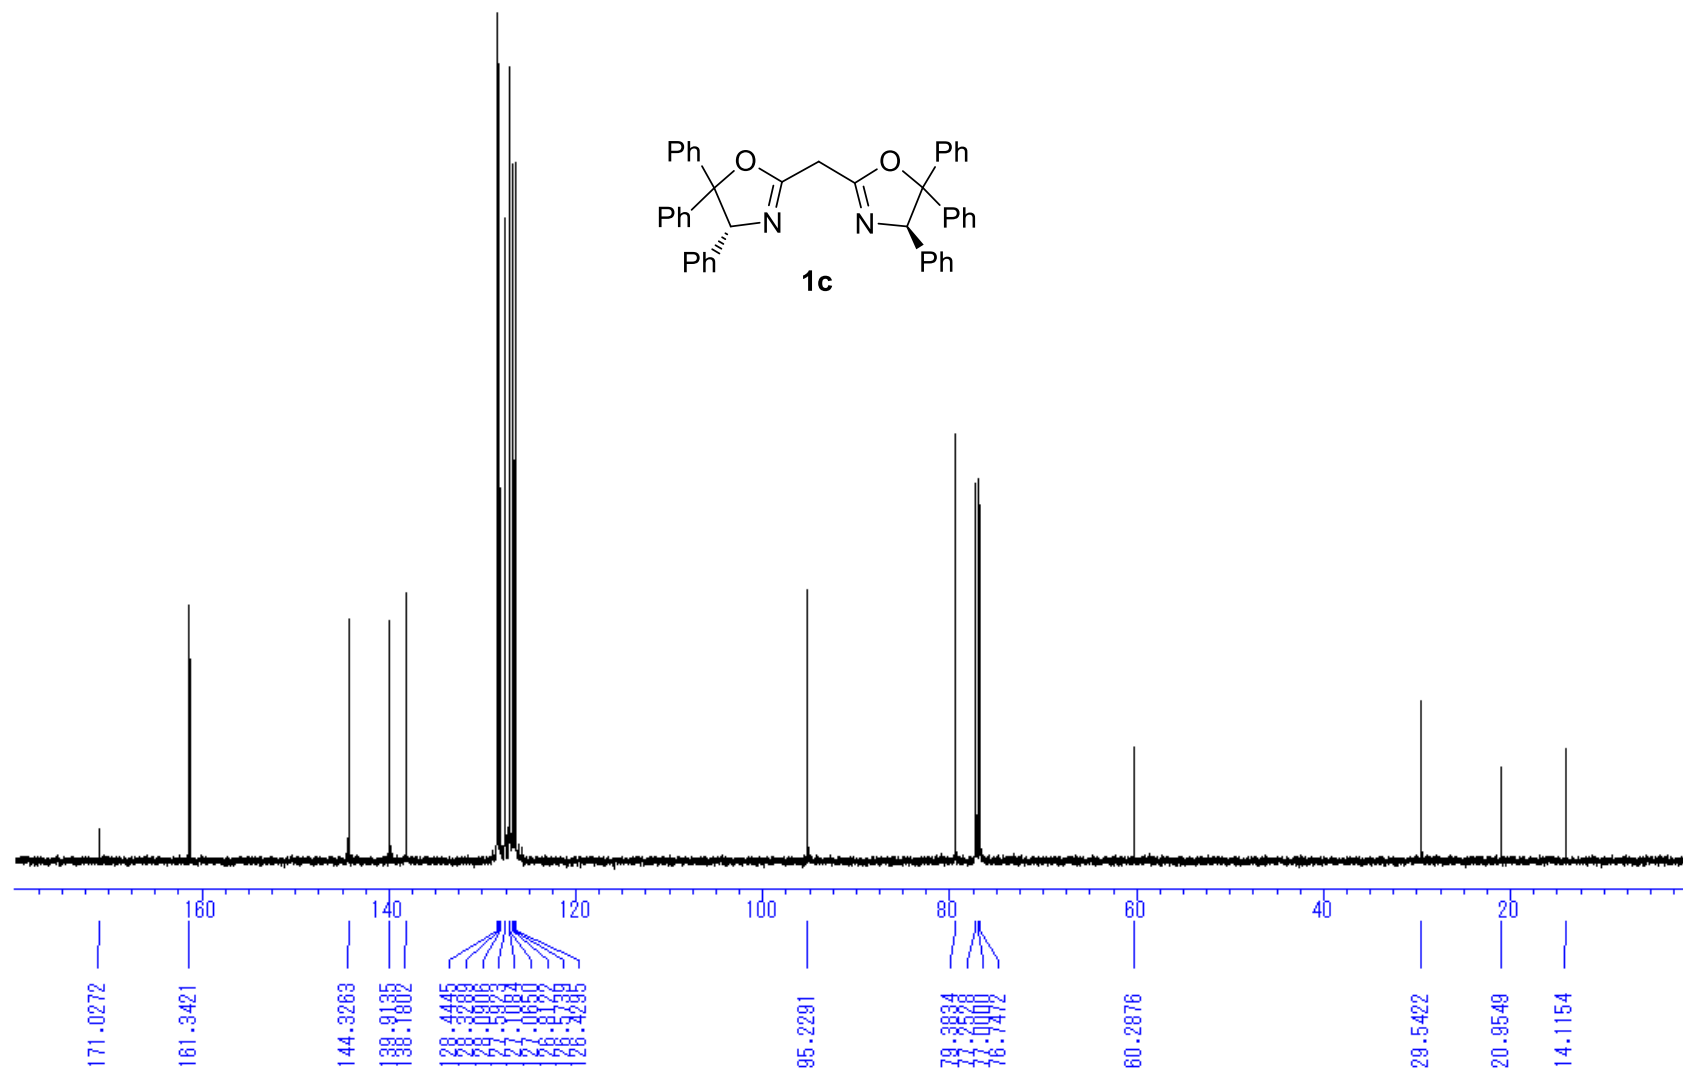

Figure S10. <sup>13</sup>C NMR Spectrum of BOX (1c).

1-4. NMR spectra of neutral (BOX)PdCl<sub>2</sub> (2a-d).

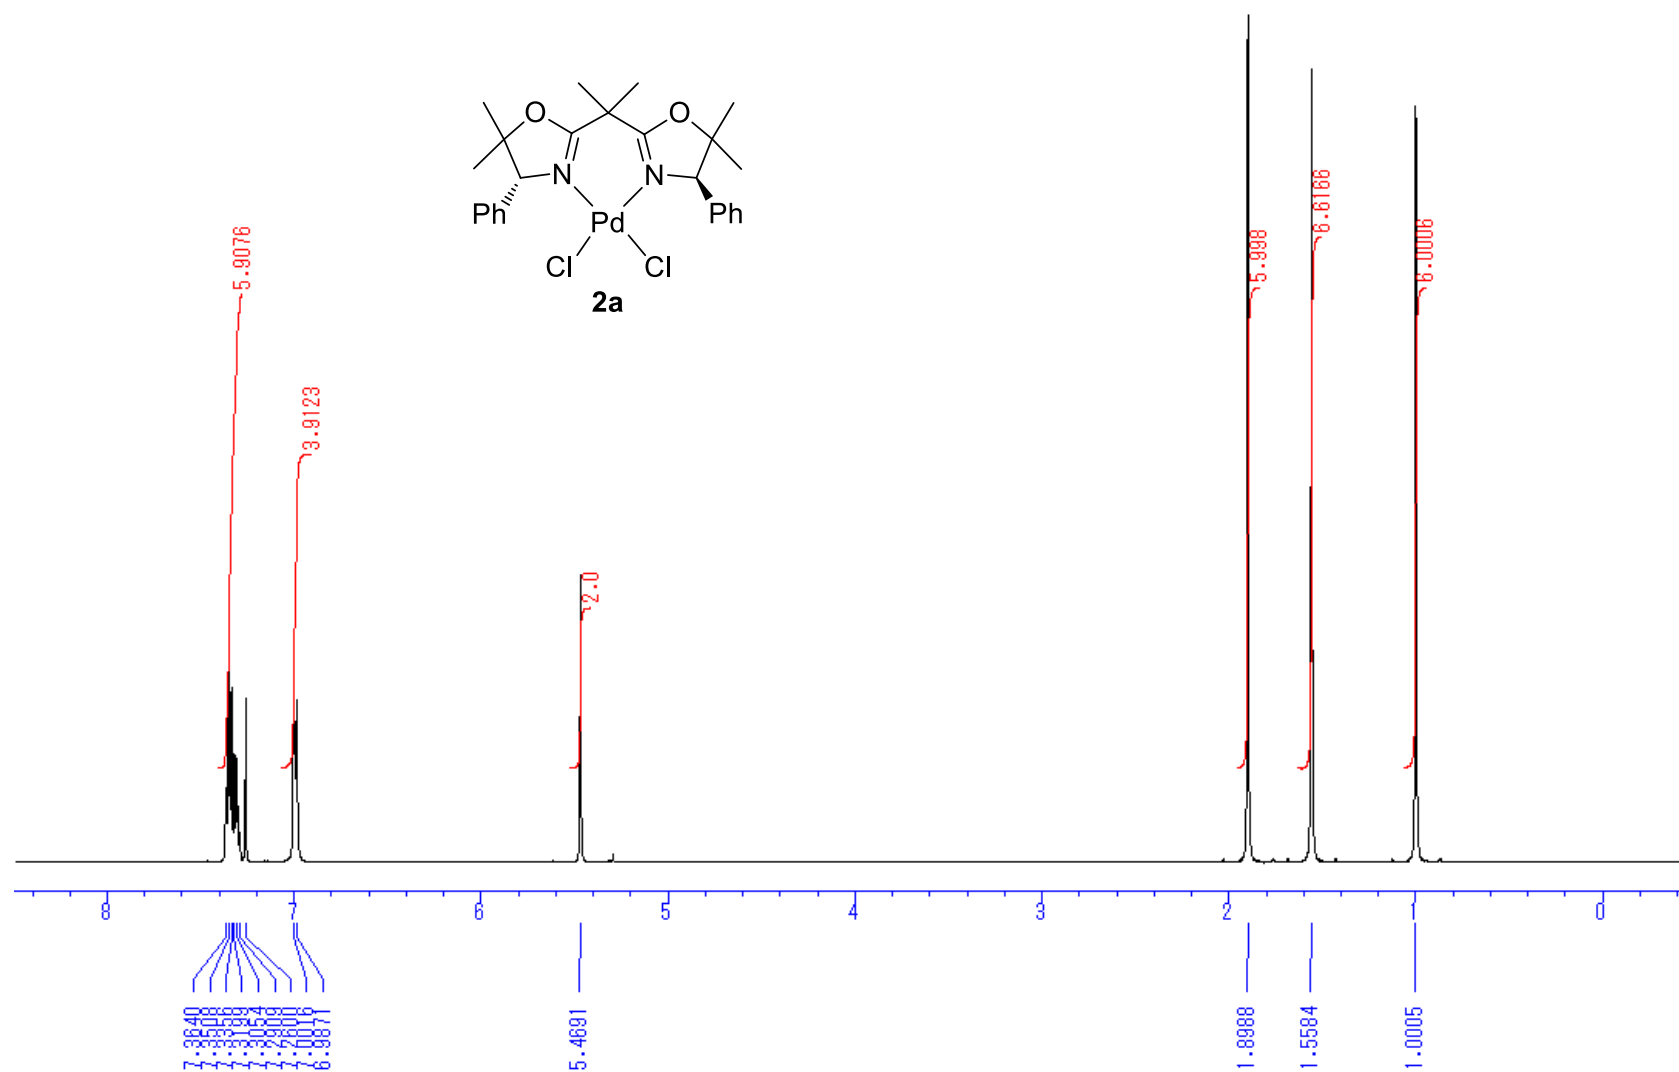

Figure S11. <sup>1</sup>H NMR Spectrum of (BOX)PdCl<sub>2</sub> (2a).

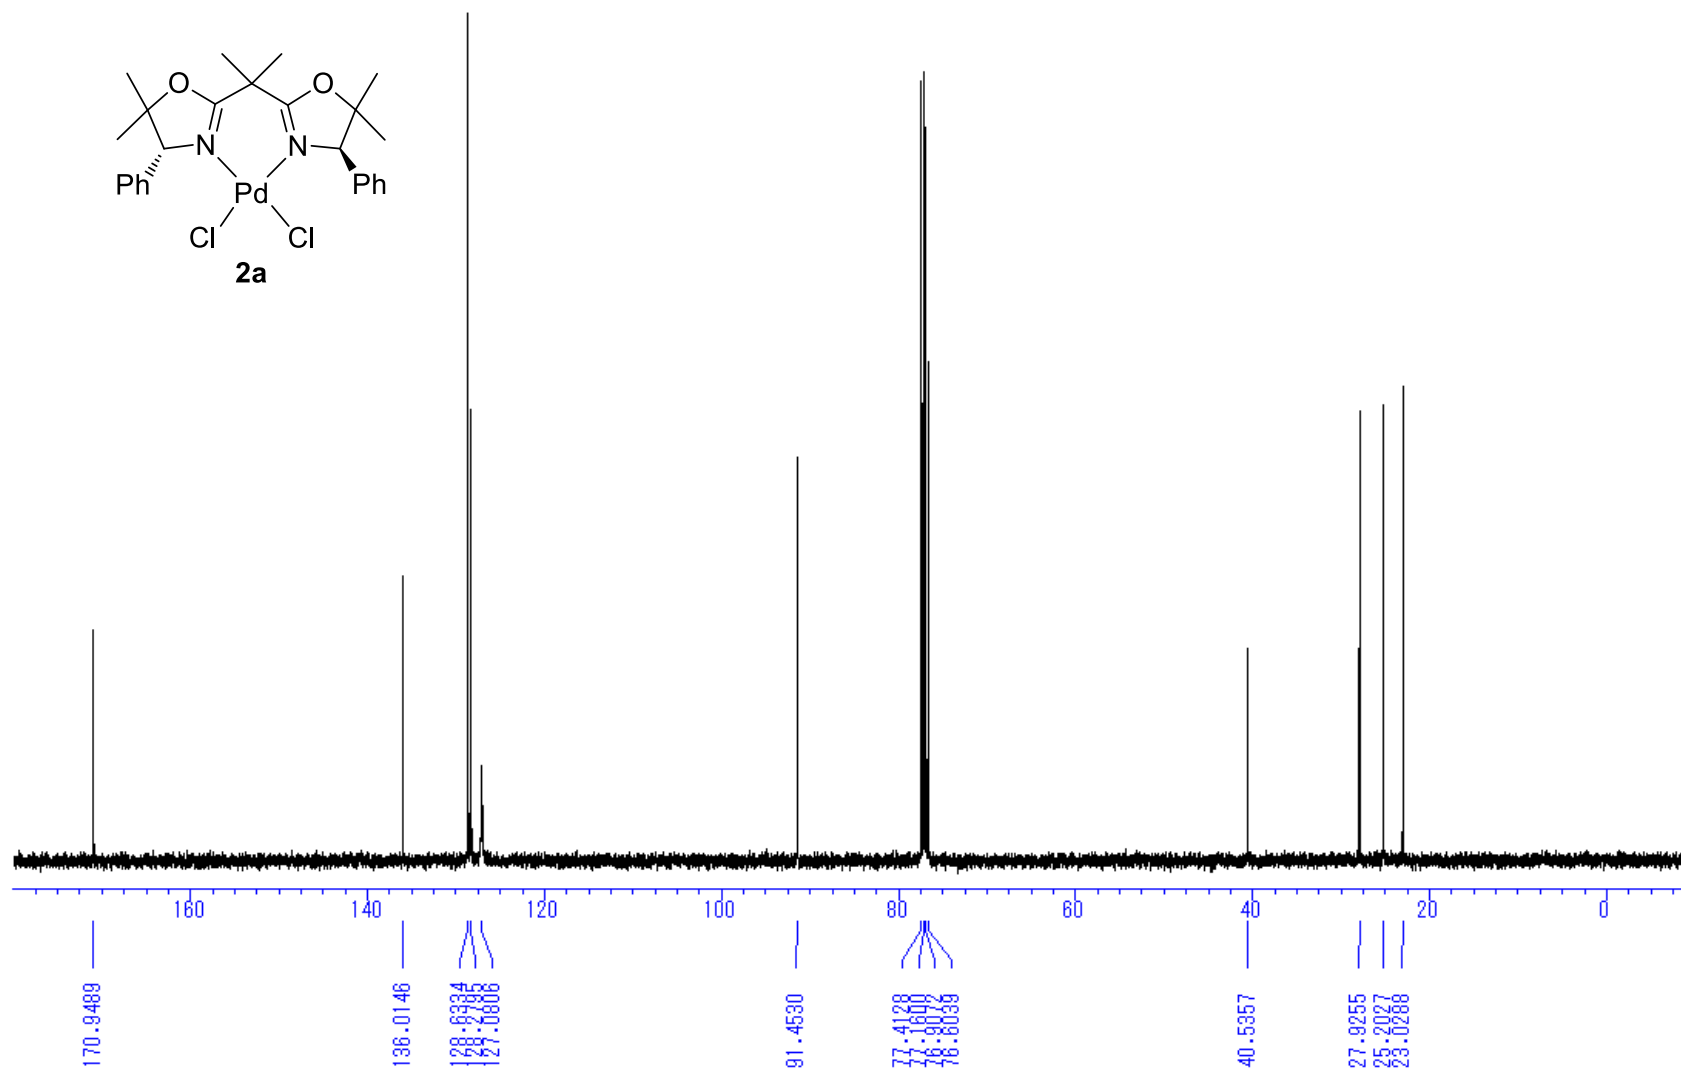

Figure S12. <sup>13</sup>C NMR Spectrum of (BOX)PdCl<sub>2</sub> (2a).

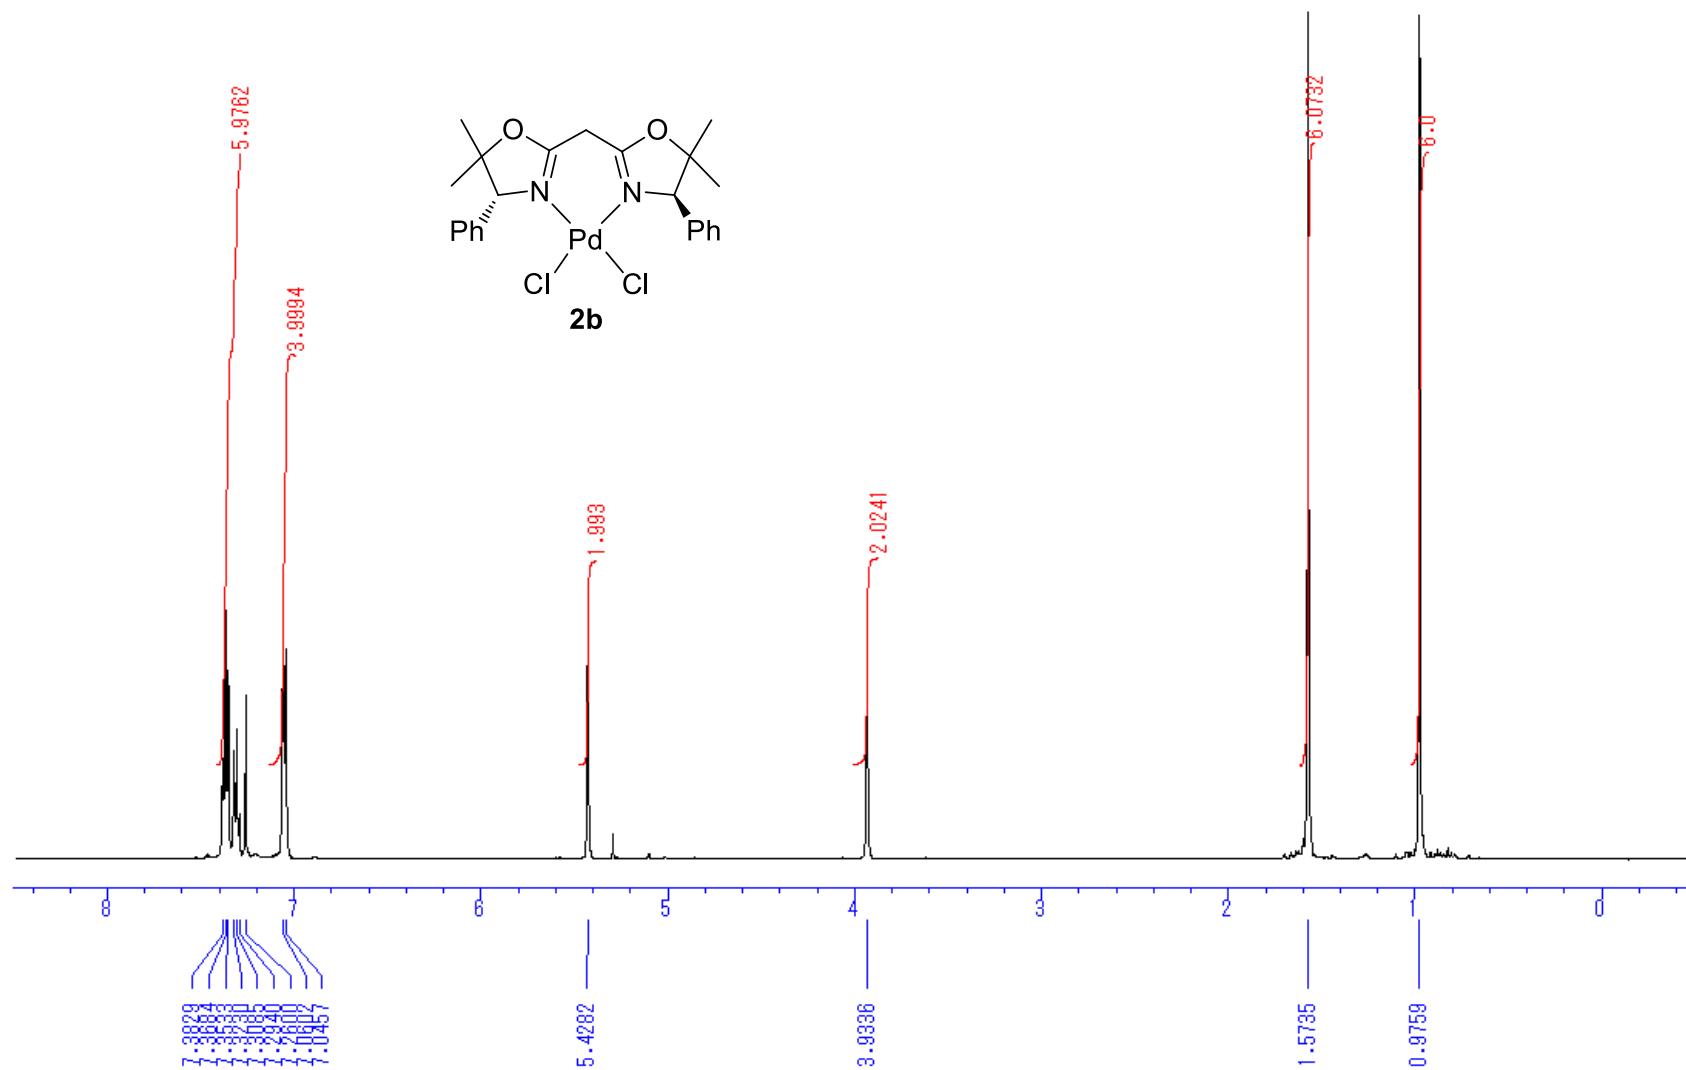

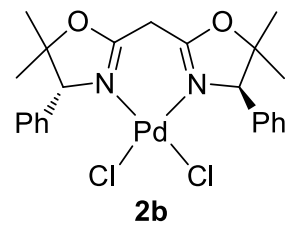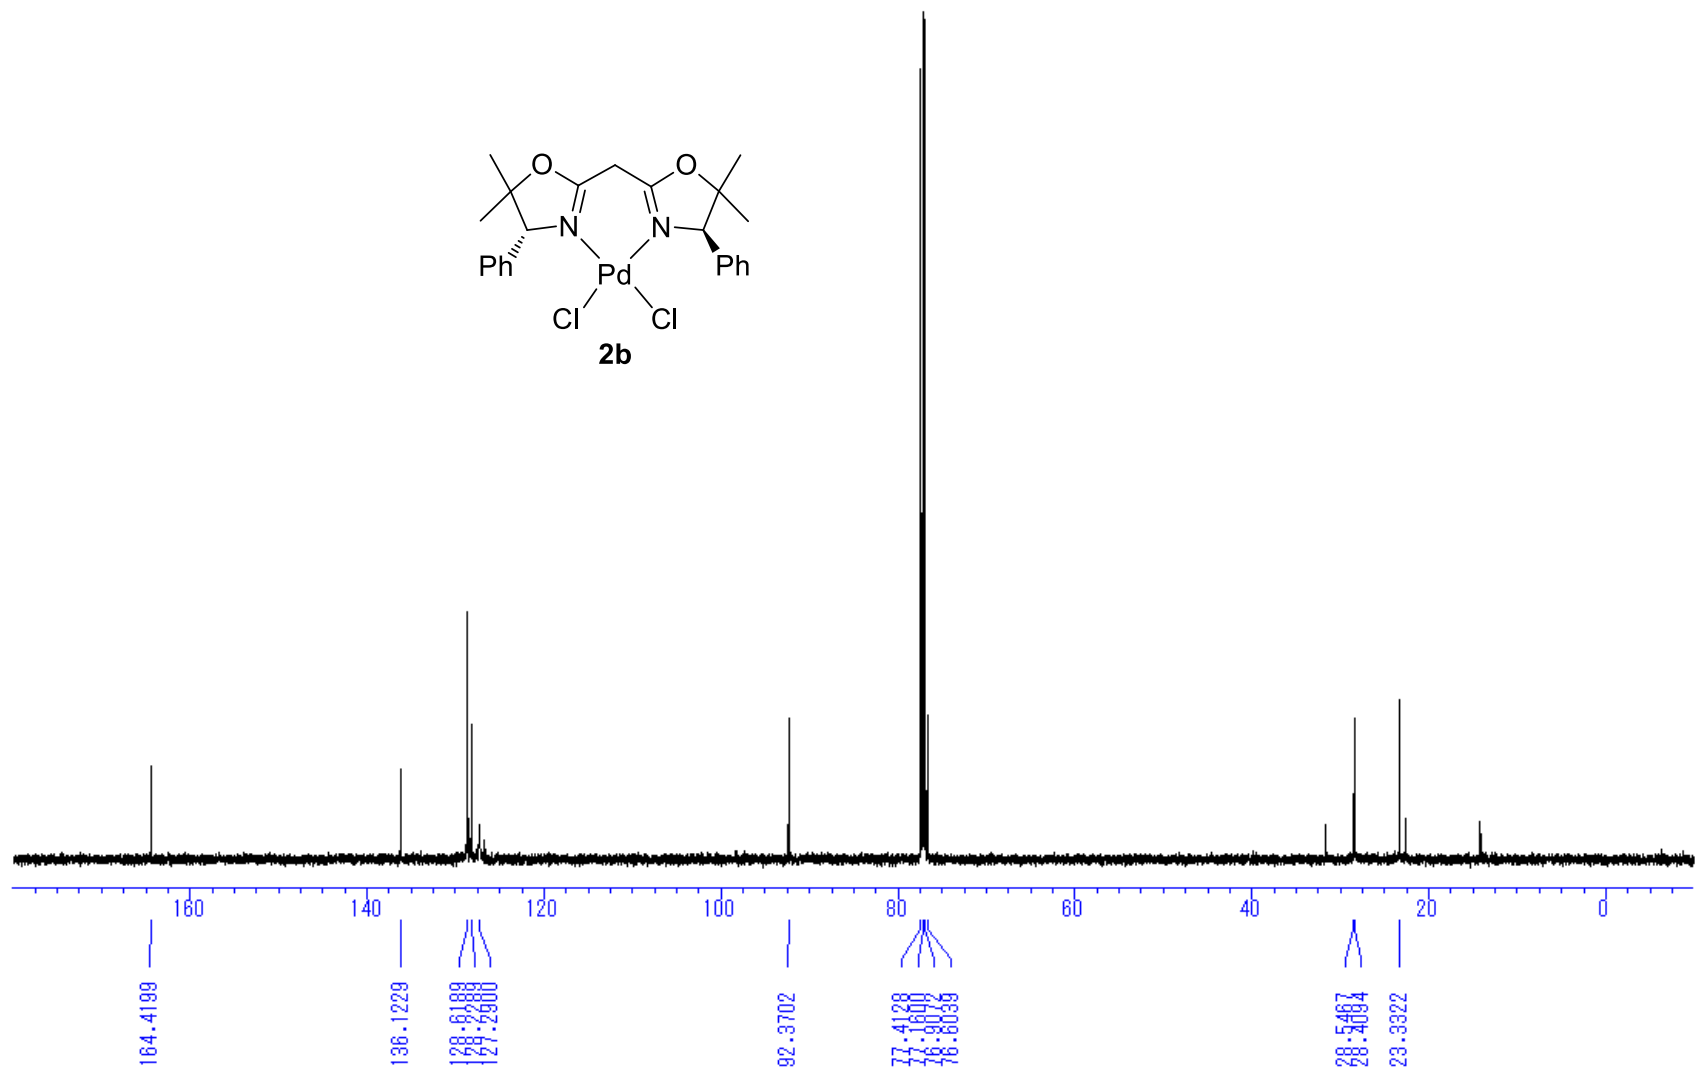

Figure S14. <sup>13</sup>C NMR Spectrum of (BOX)PdCl<sub>2</sub> (2b).

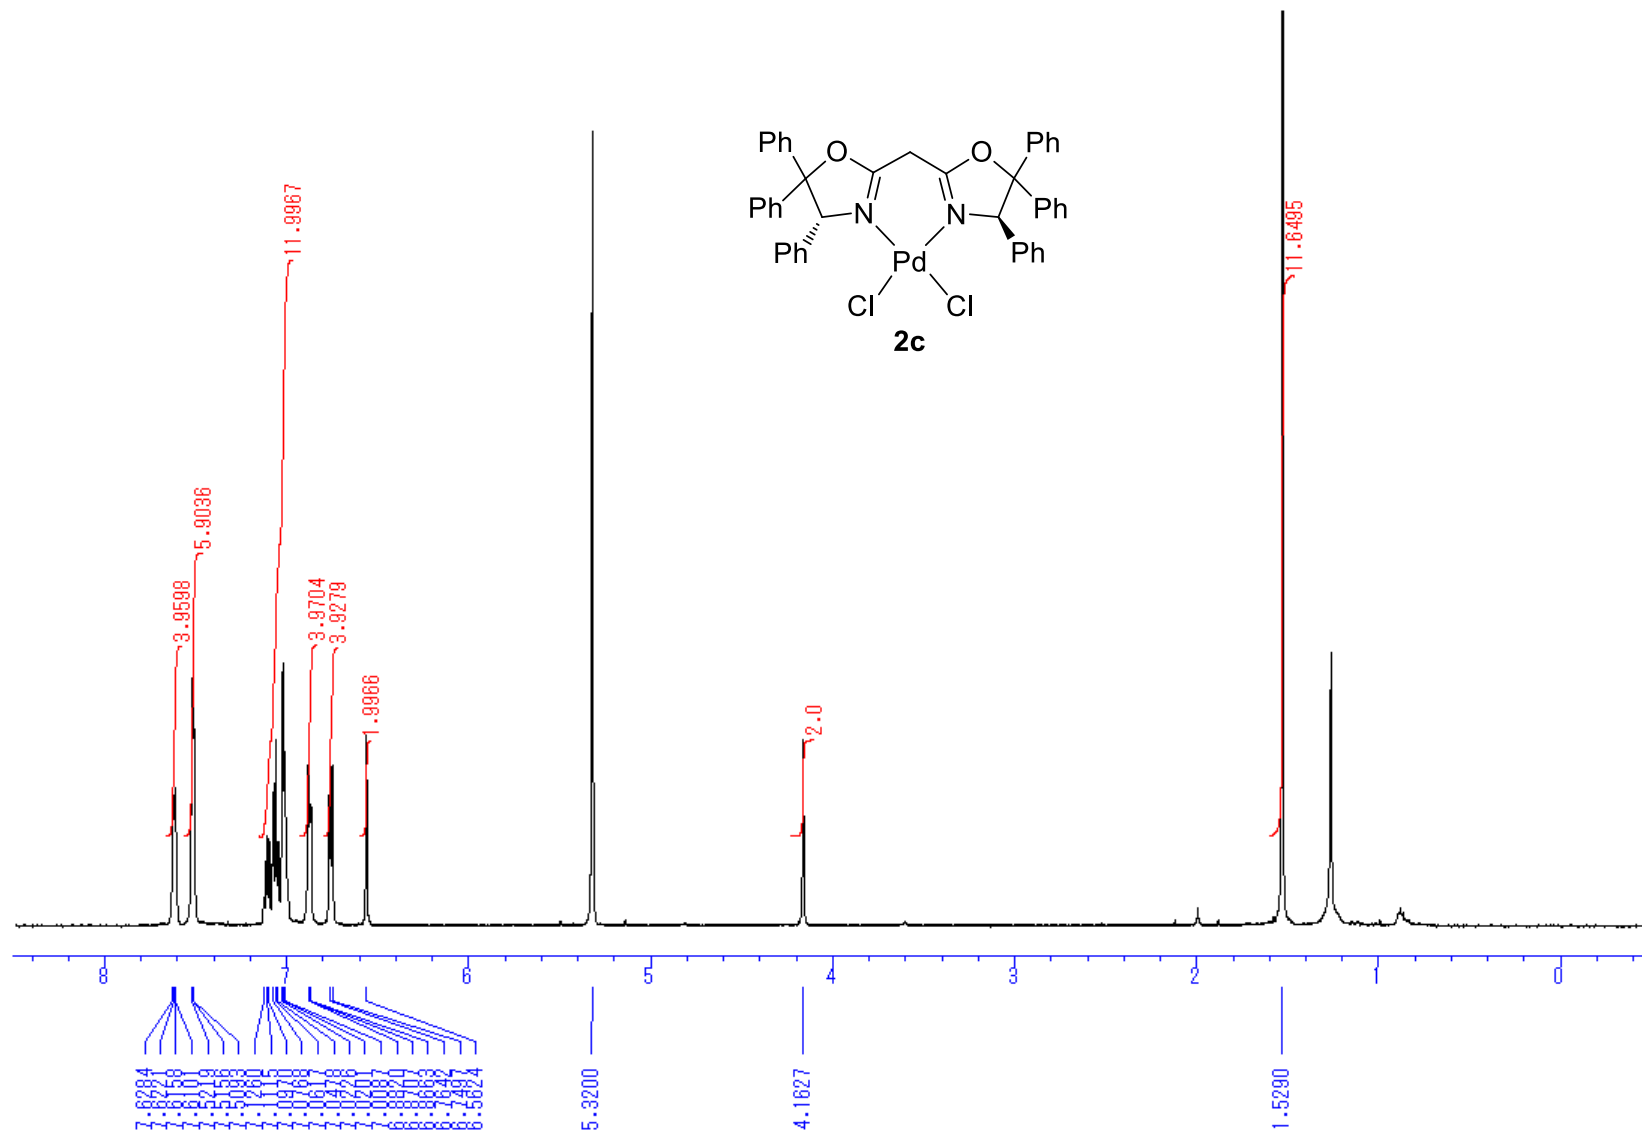

Figure S15. <sup>1</sup>H NMR Spectrum of (BOX)PdCl<sub>2</sub> (2c).





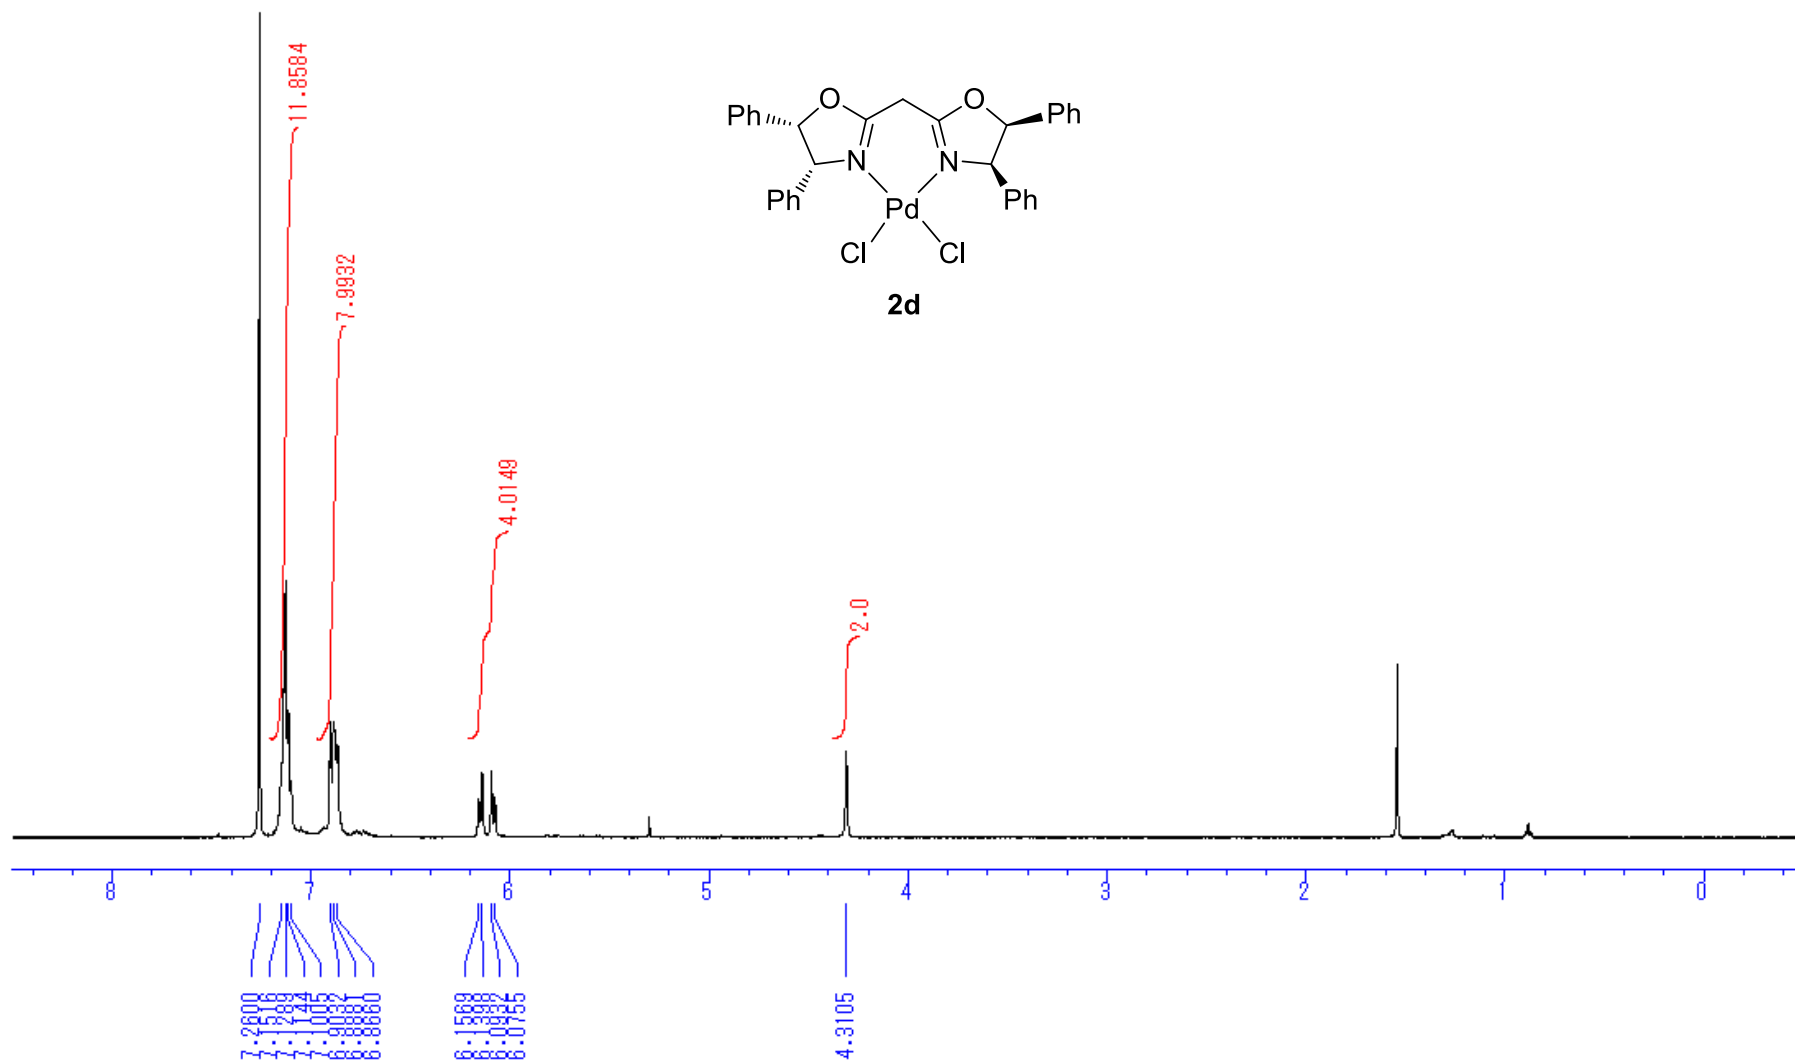

Figure S17. <sup>1</sup>H NMR Spectrum of (BOX)PdCl<sub>2</sub> (2d).

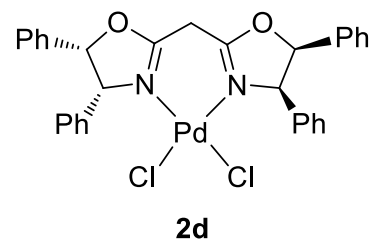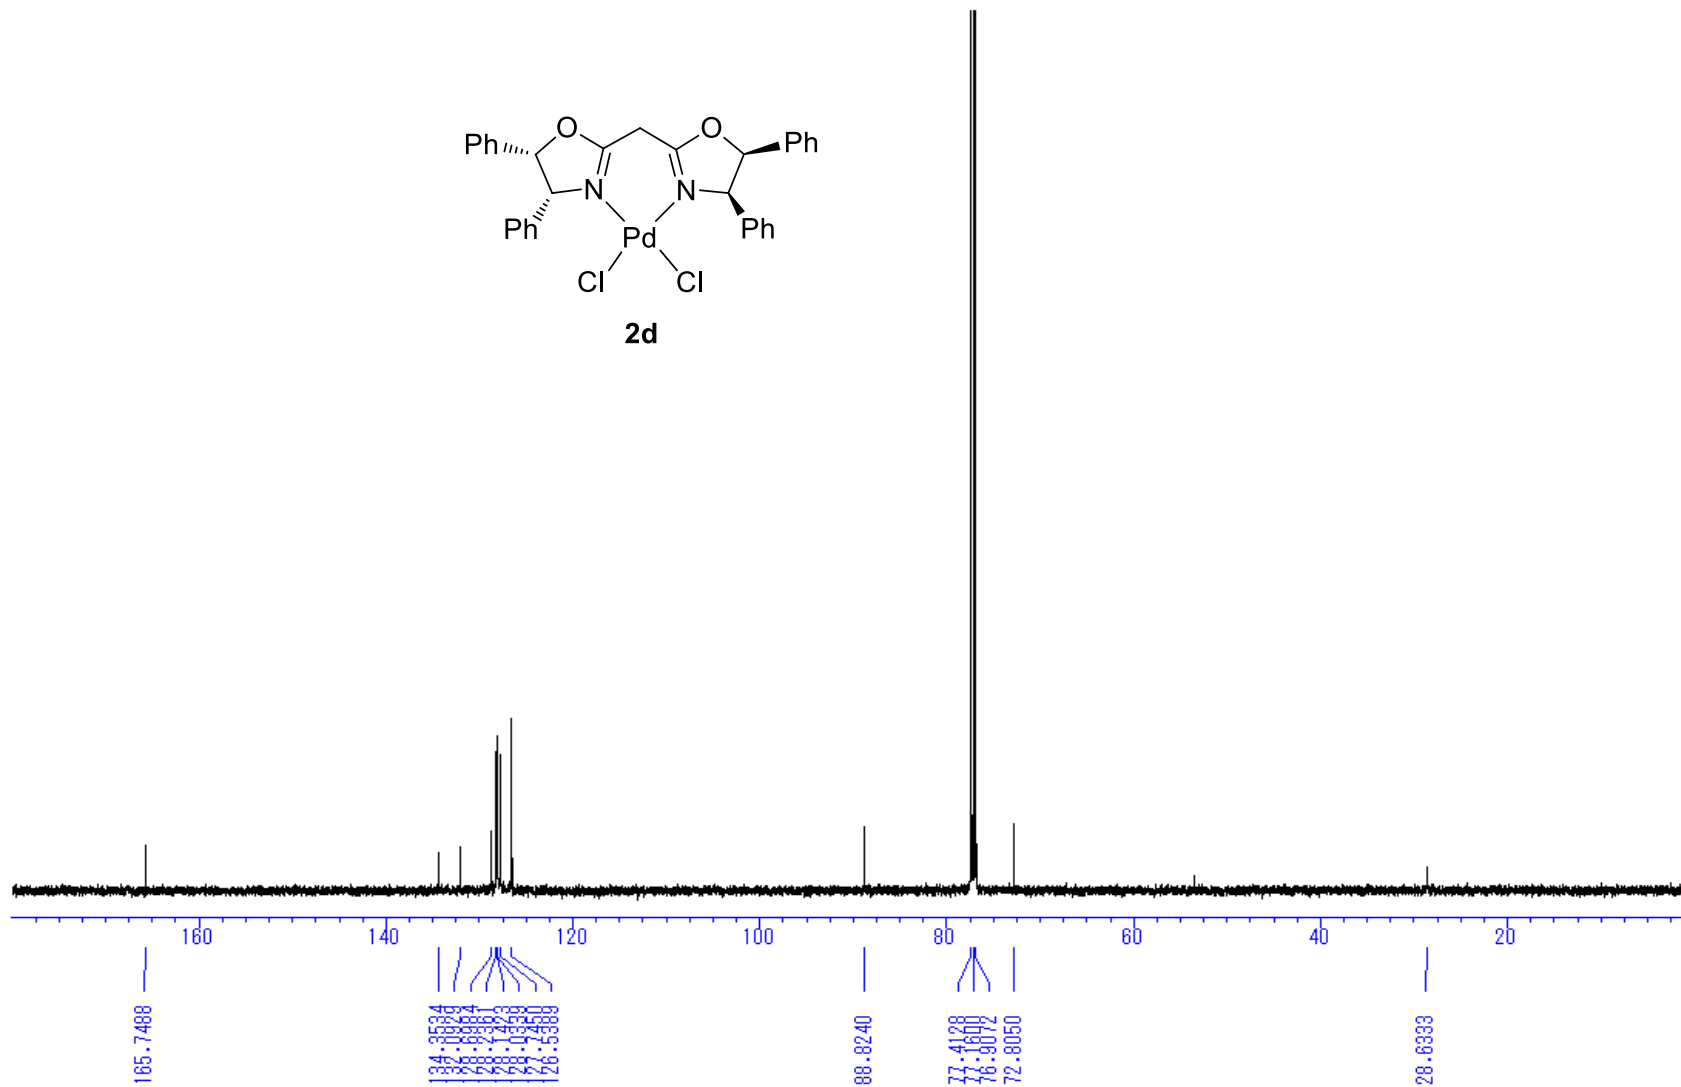

Figure S18.  $^{13}\text{C}$  NMR Spectrum of (BOX)PdCl<sub>2</sub> (2d).

1-5. NMR spectra of neutral (BOX)PdMeCl (3a-d).

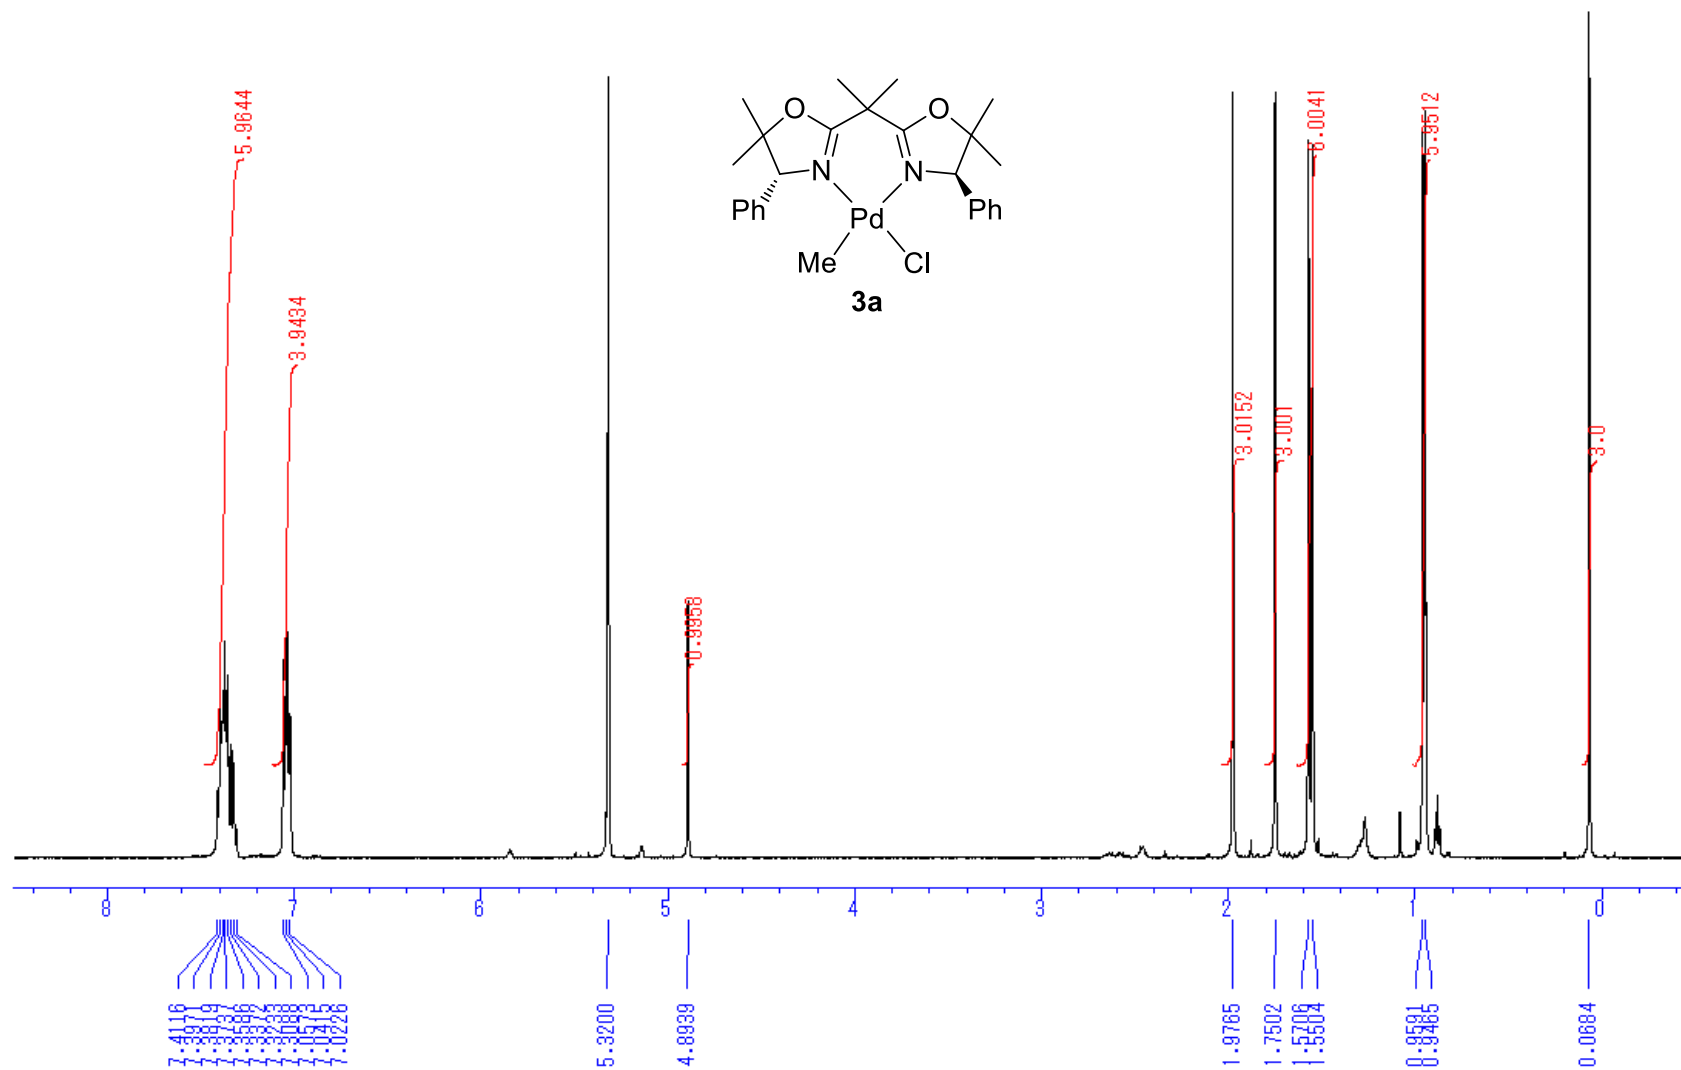

Figure S19. <sup>1</sup>H NMR Spectrum of (BOX)PdMeCl (3a).

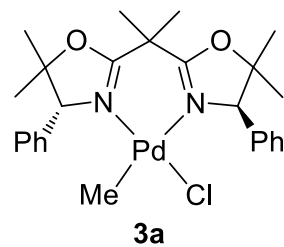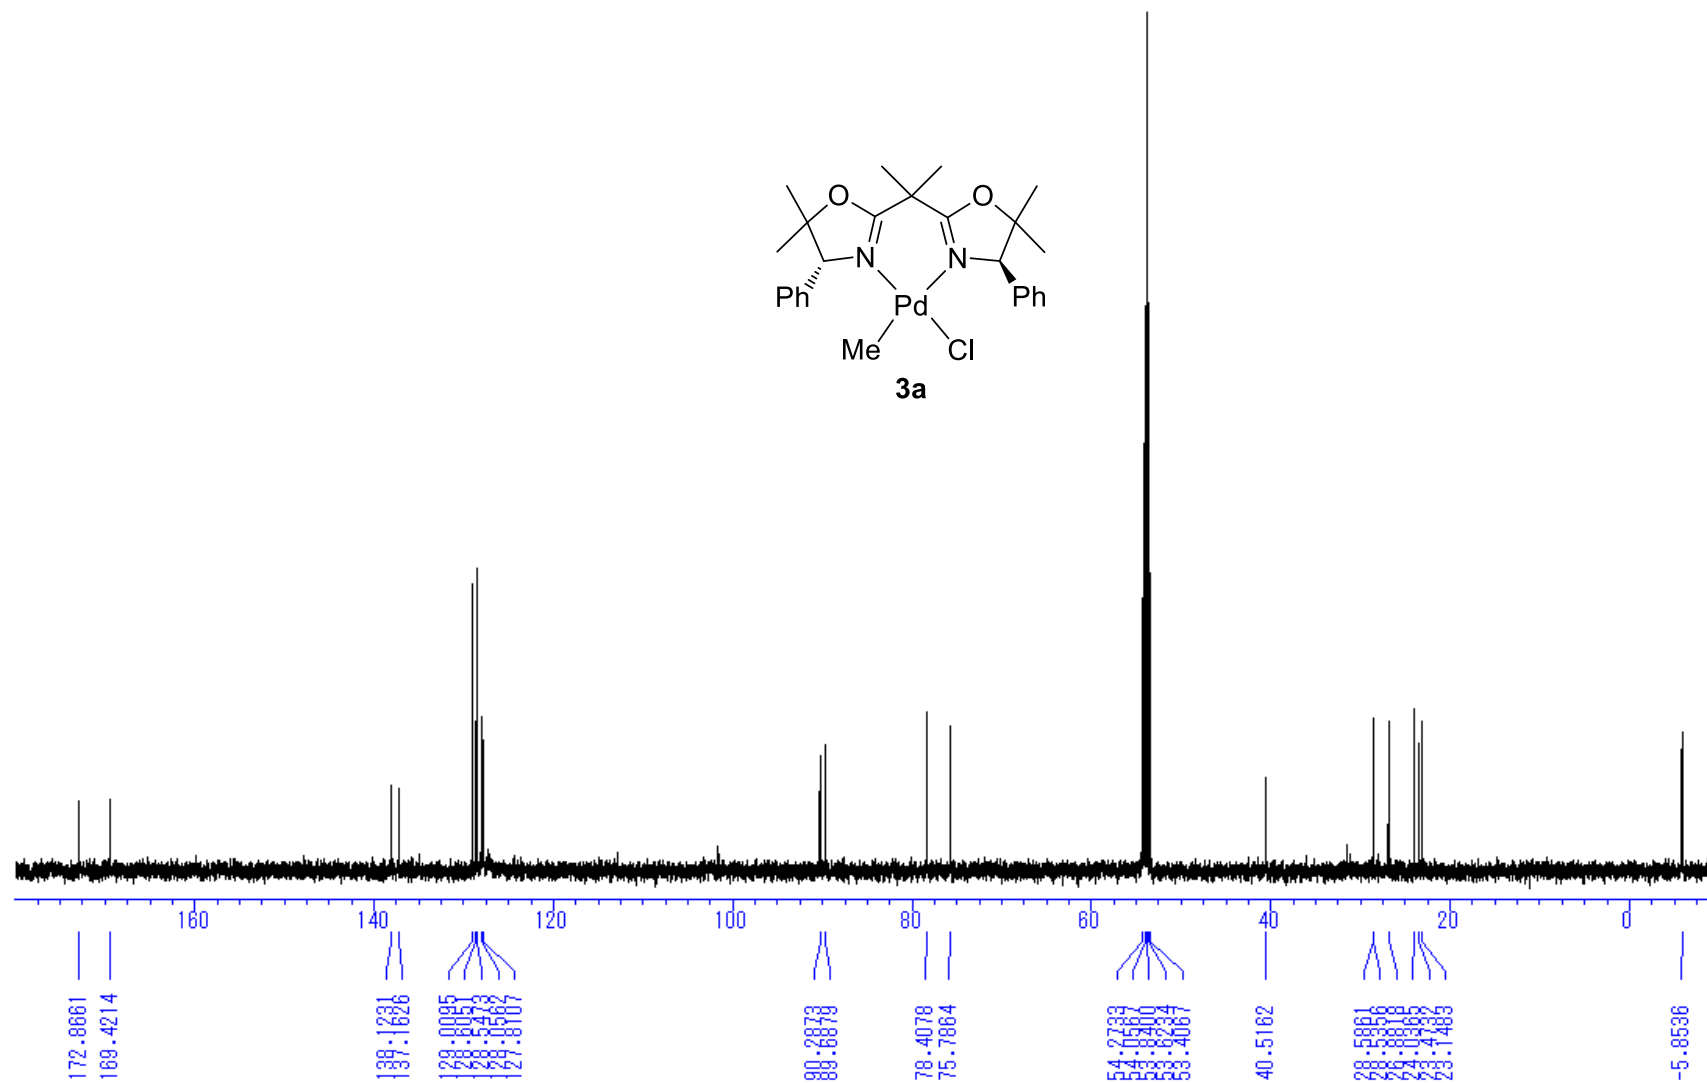

Figure S20. <sup>13</sup>C NMR Spectrum of (BOX)PdMeCl (3a).

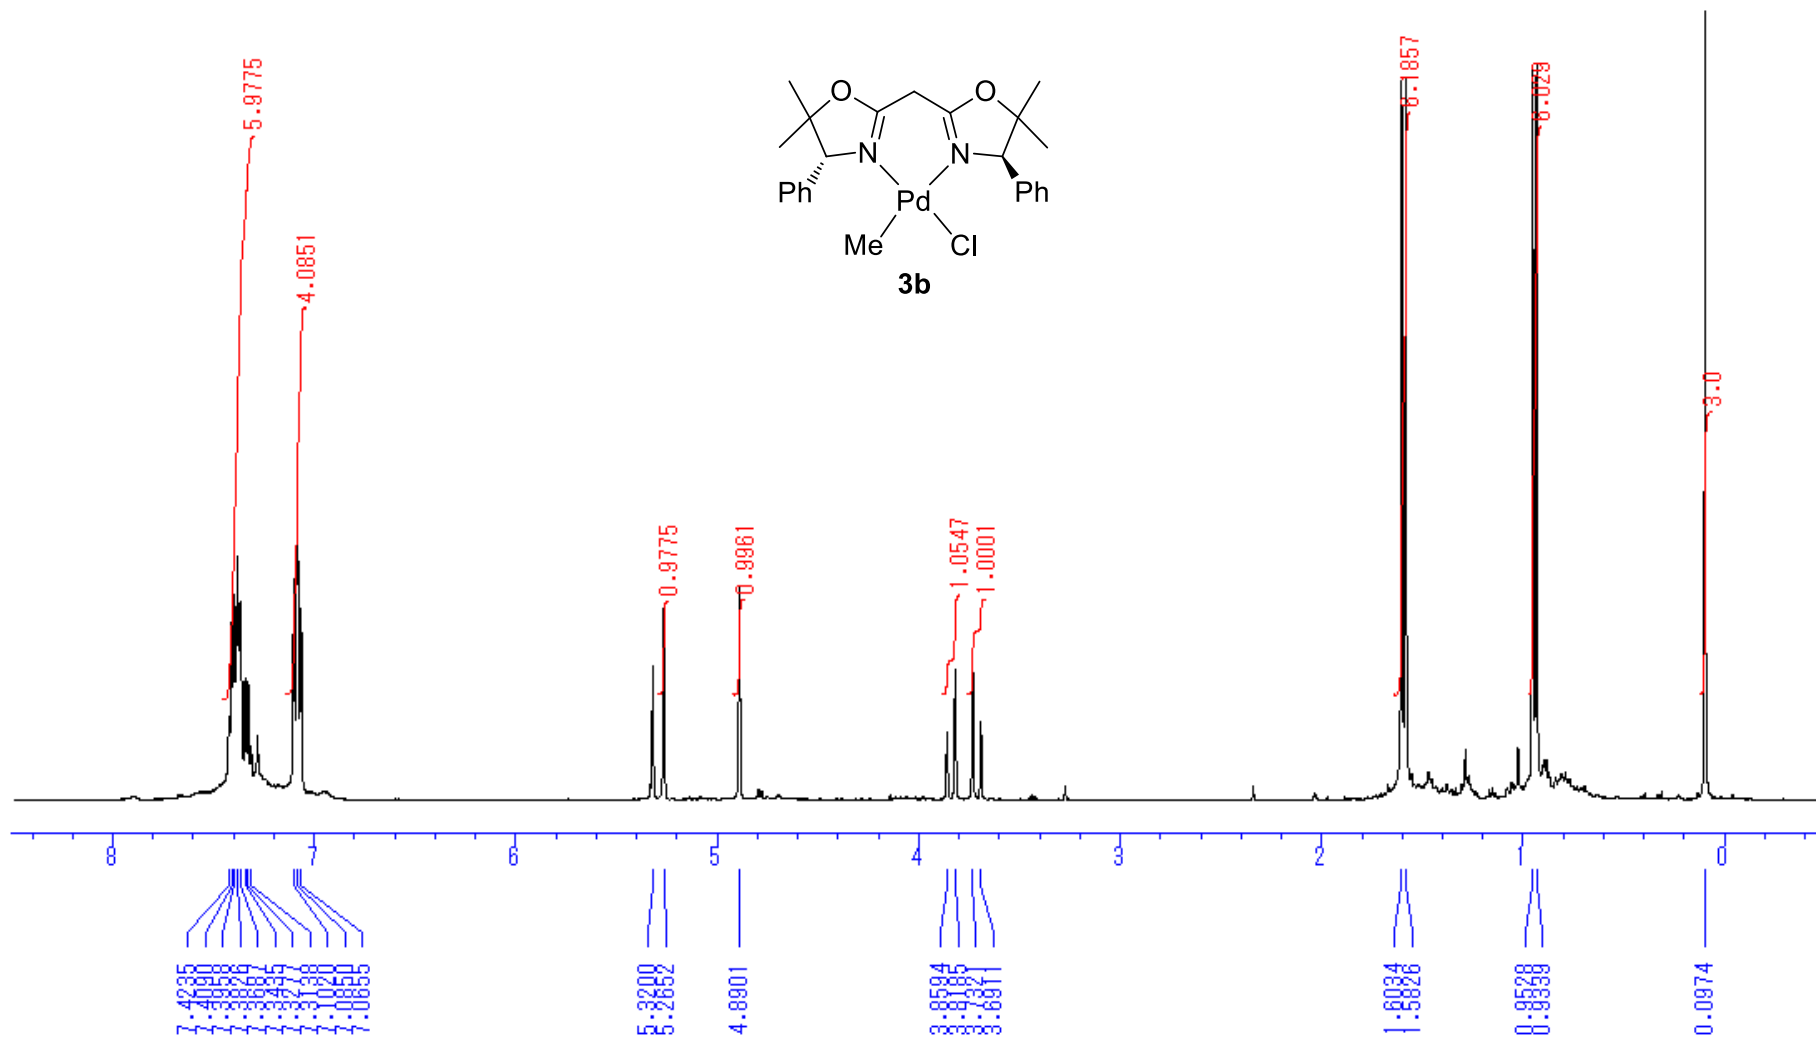

Figure S21. <sup>1</sup>H NMR Spectrum of (BOX)PdMeCl (3b).

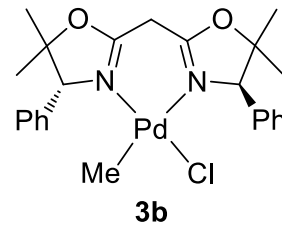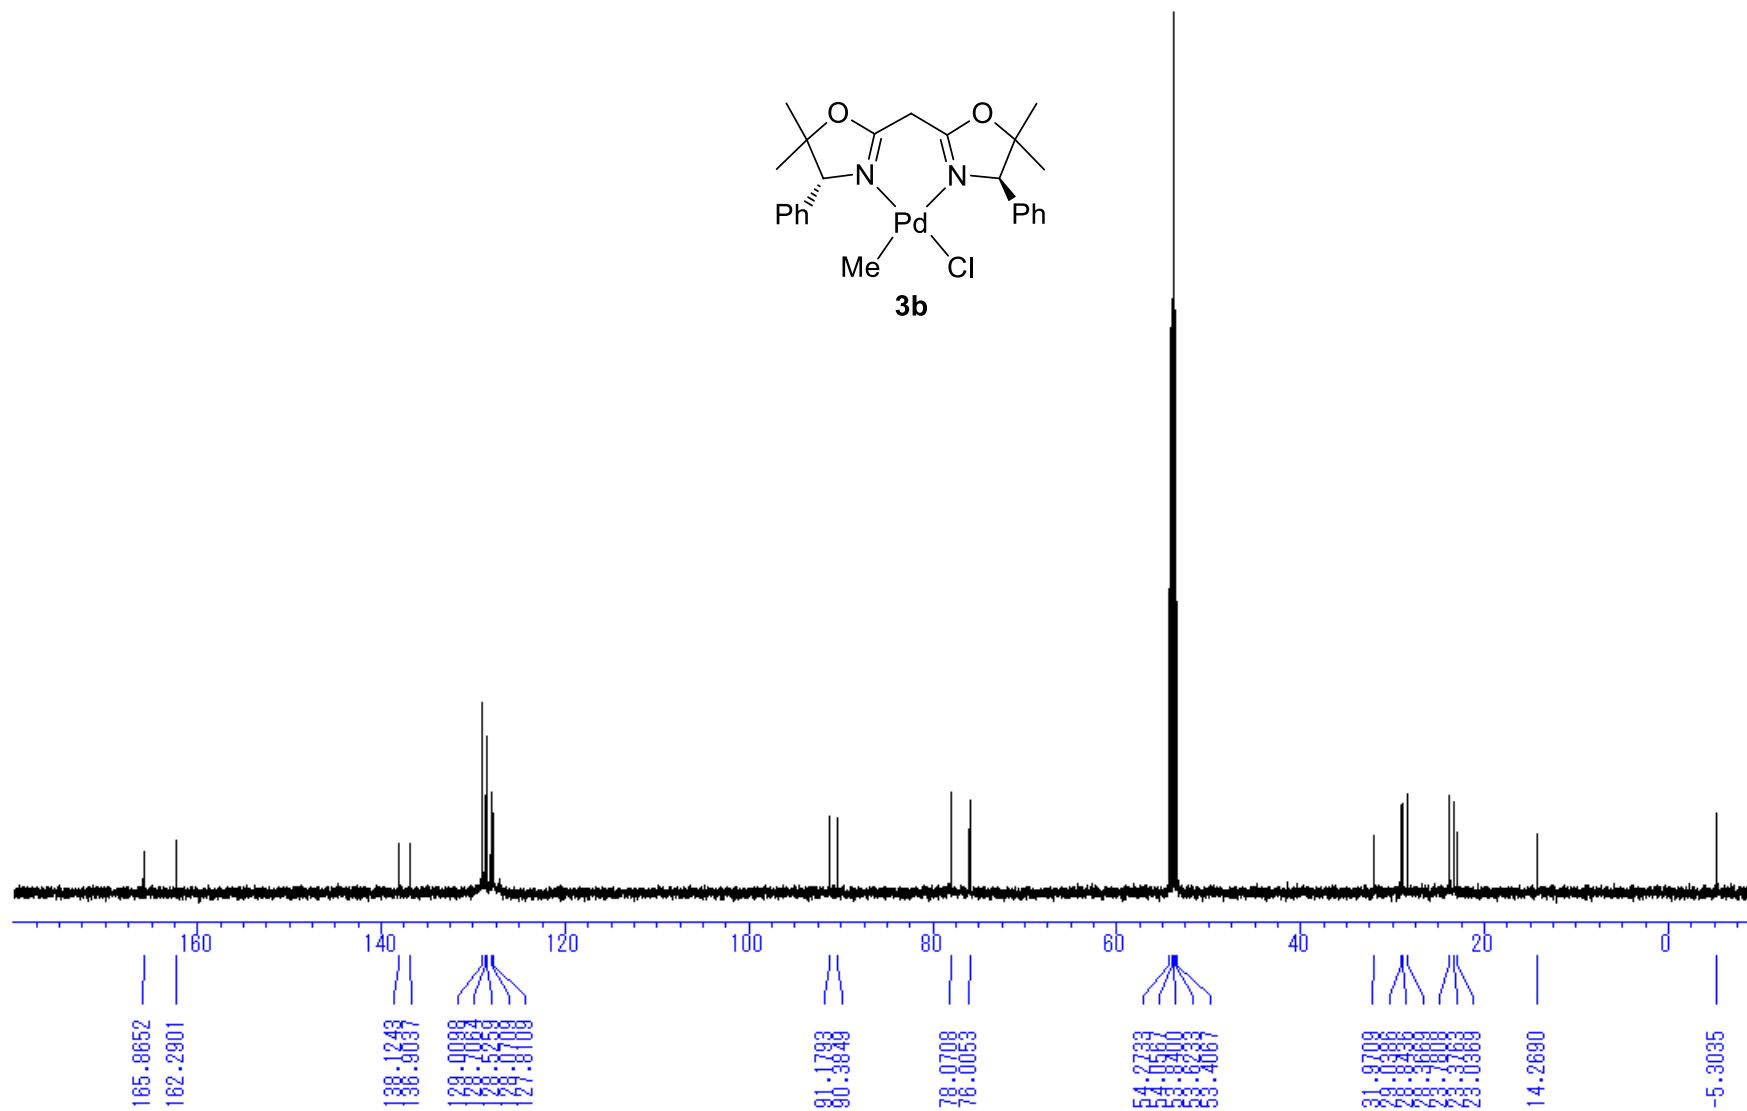

Figure S22. <sup>13</sup>C NMR Spectrum of (BOX)PdMeCl (3b).

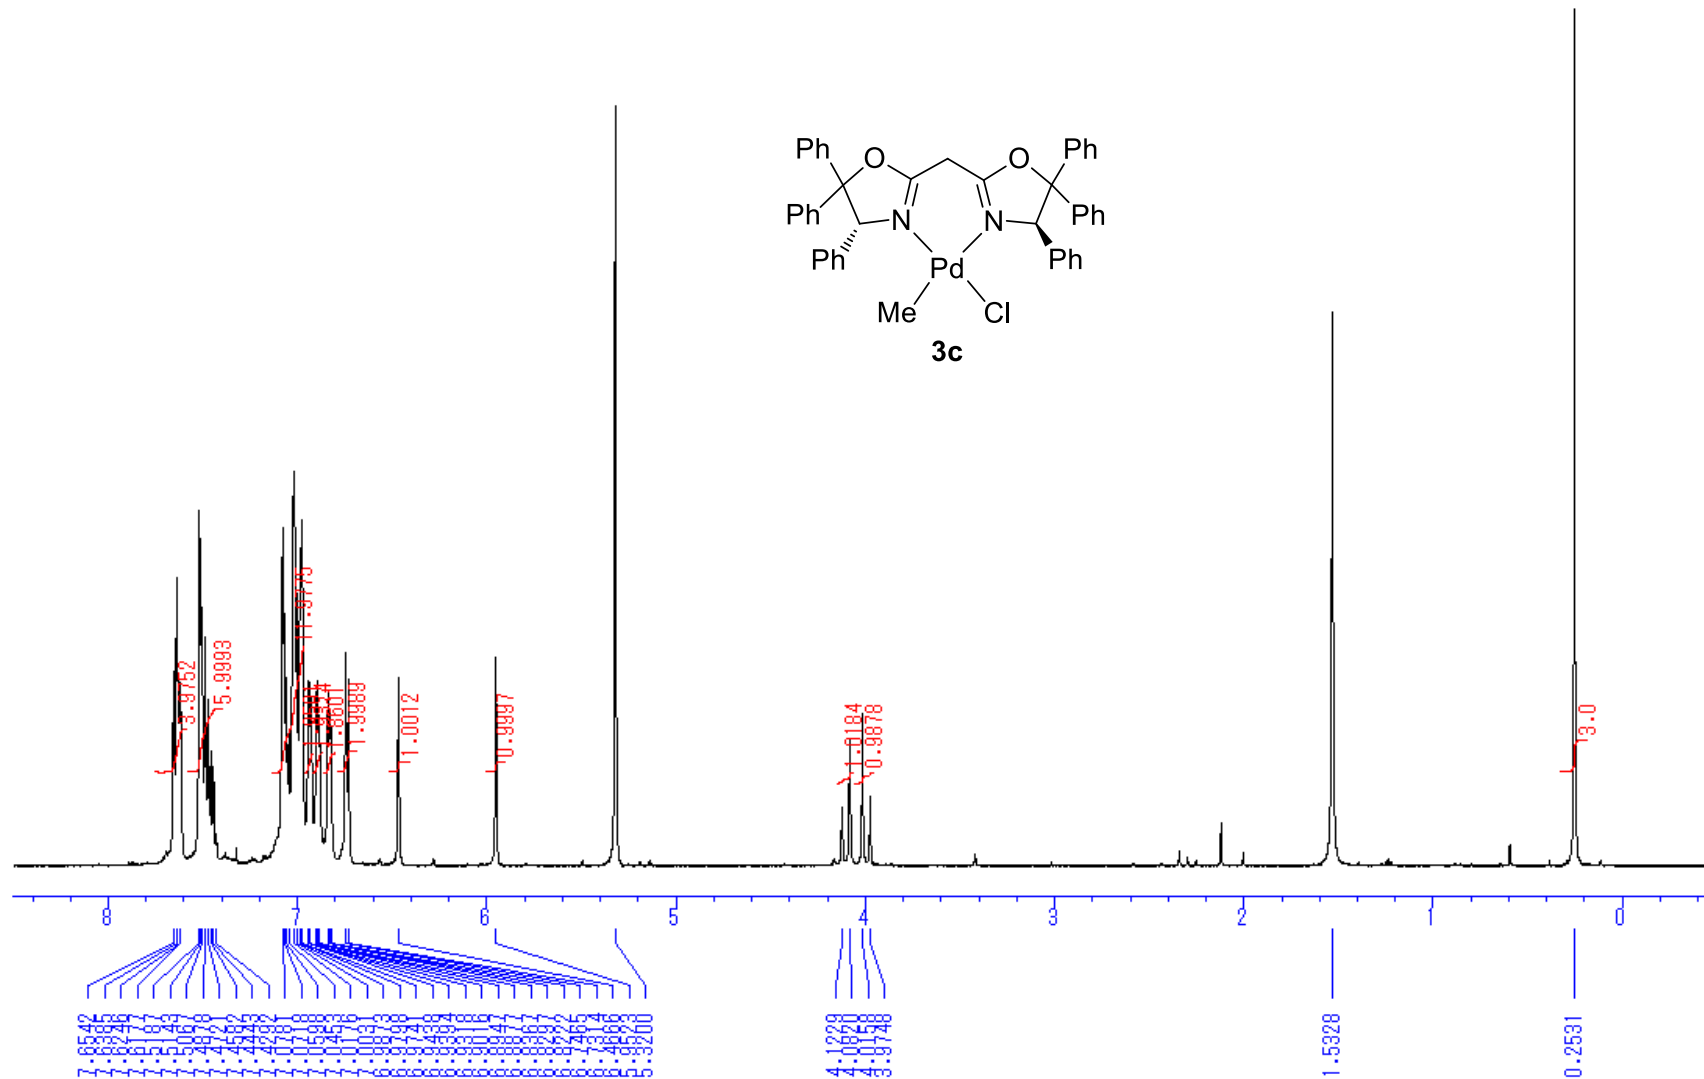

Figure S23. <sup>1</sup>H NMR Spectrum of (BOX)PdMeCl (3c).



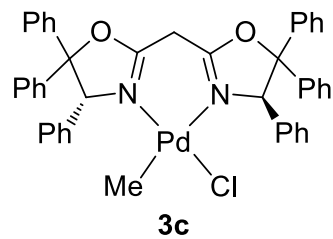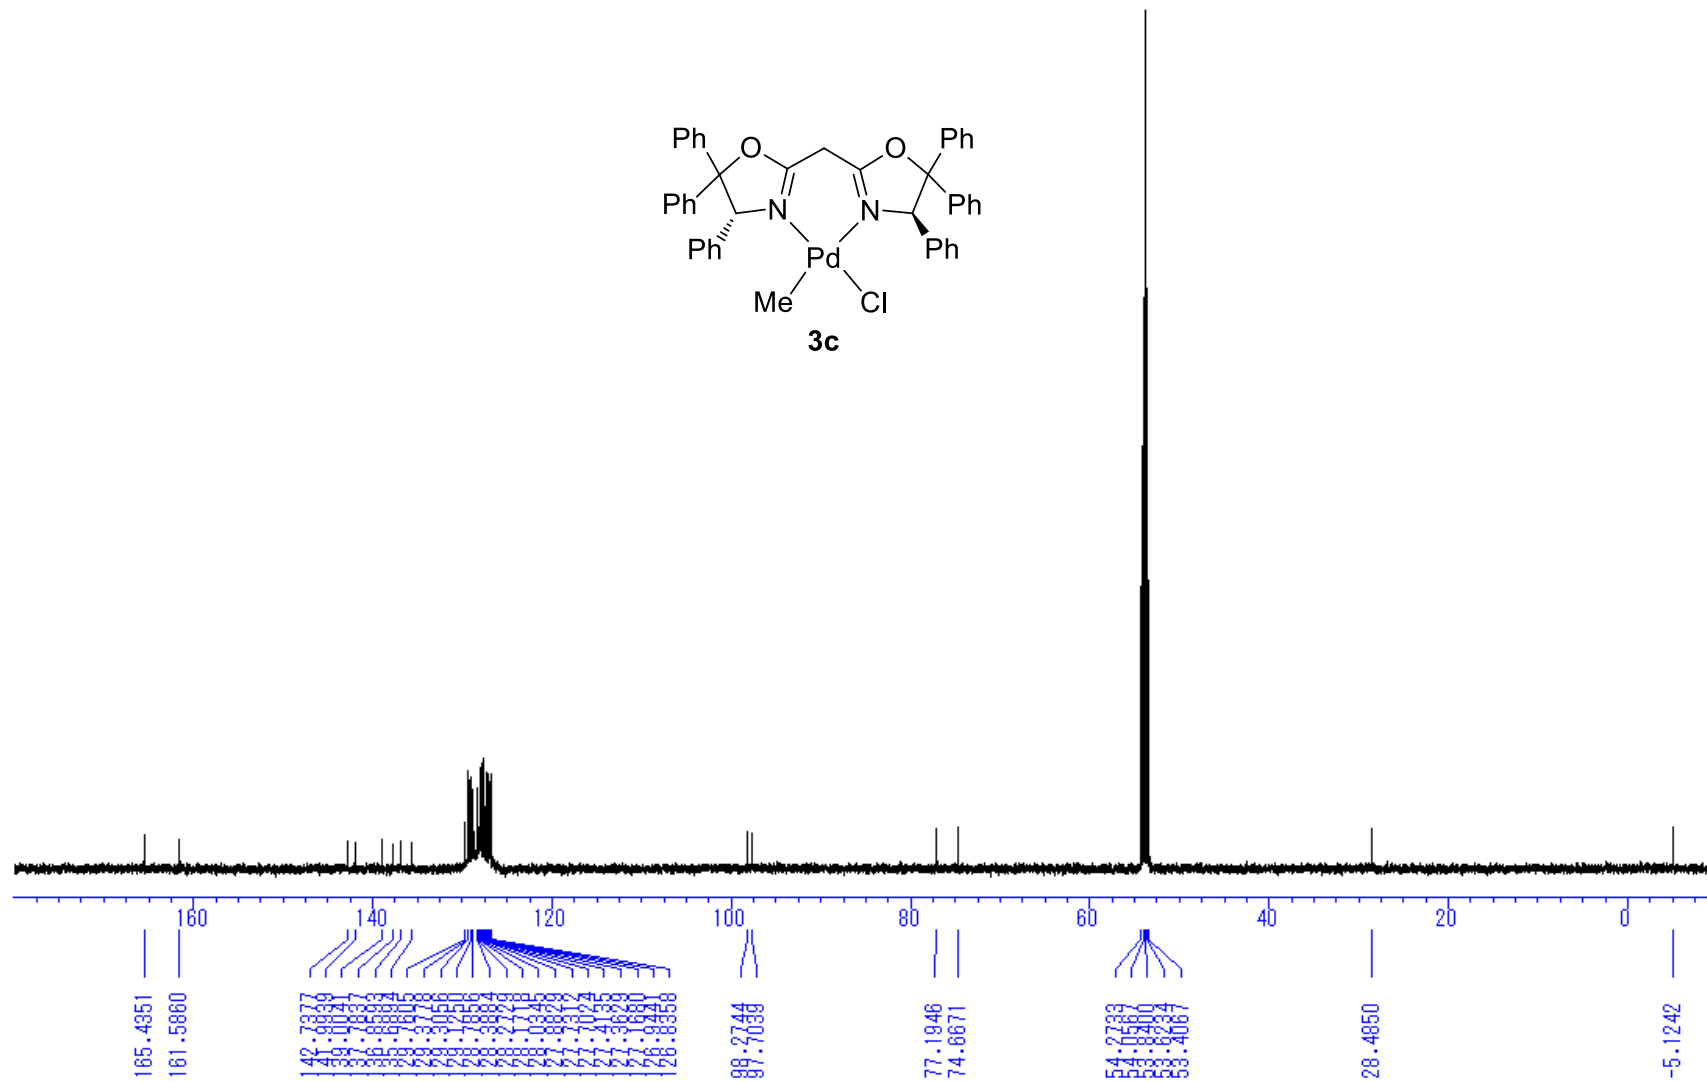

Figure S24. <sup>13</sup>C NMR Spectrum of (BOX)PdMeCl (**3c**).

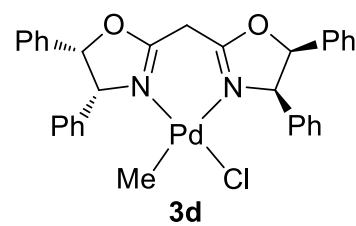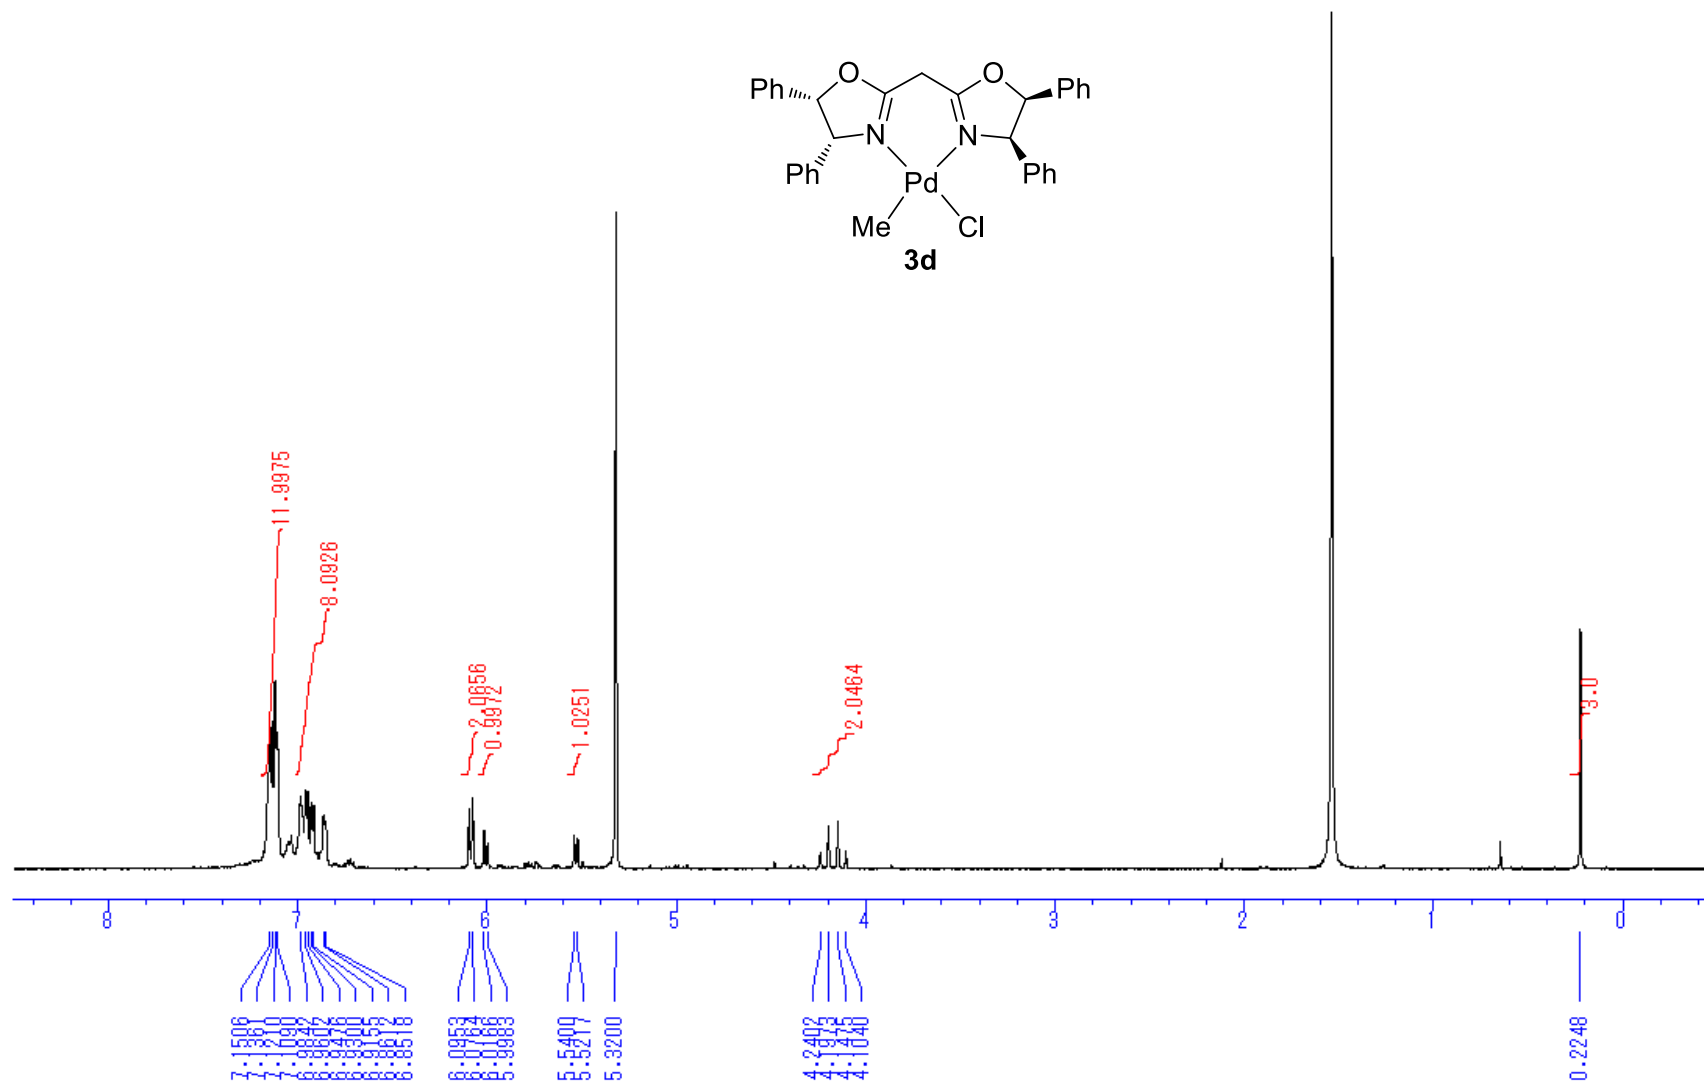

Figure S25. <sup>1</sup>H NMR Spectrum of (BOX)PdMeCl (3d).



1-6. NMR spectra of cationic [(BOX)PdMe(2,6-Me<sub>2</sub>C<sub>5</sub>H<sub>3</sub>N)]<sup>+</sup>PF<sub>6</sub><sup>-</sup> (4a-d).

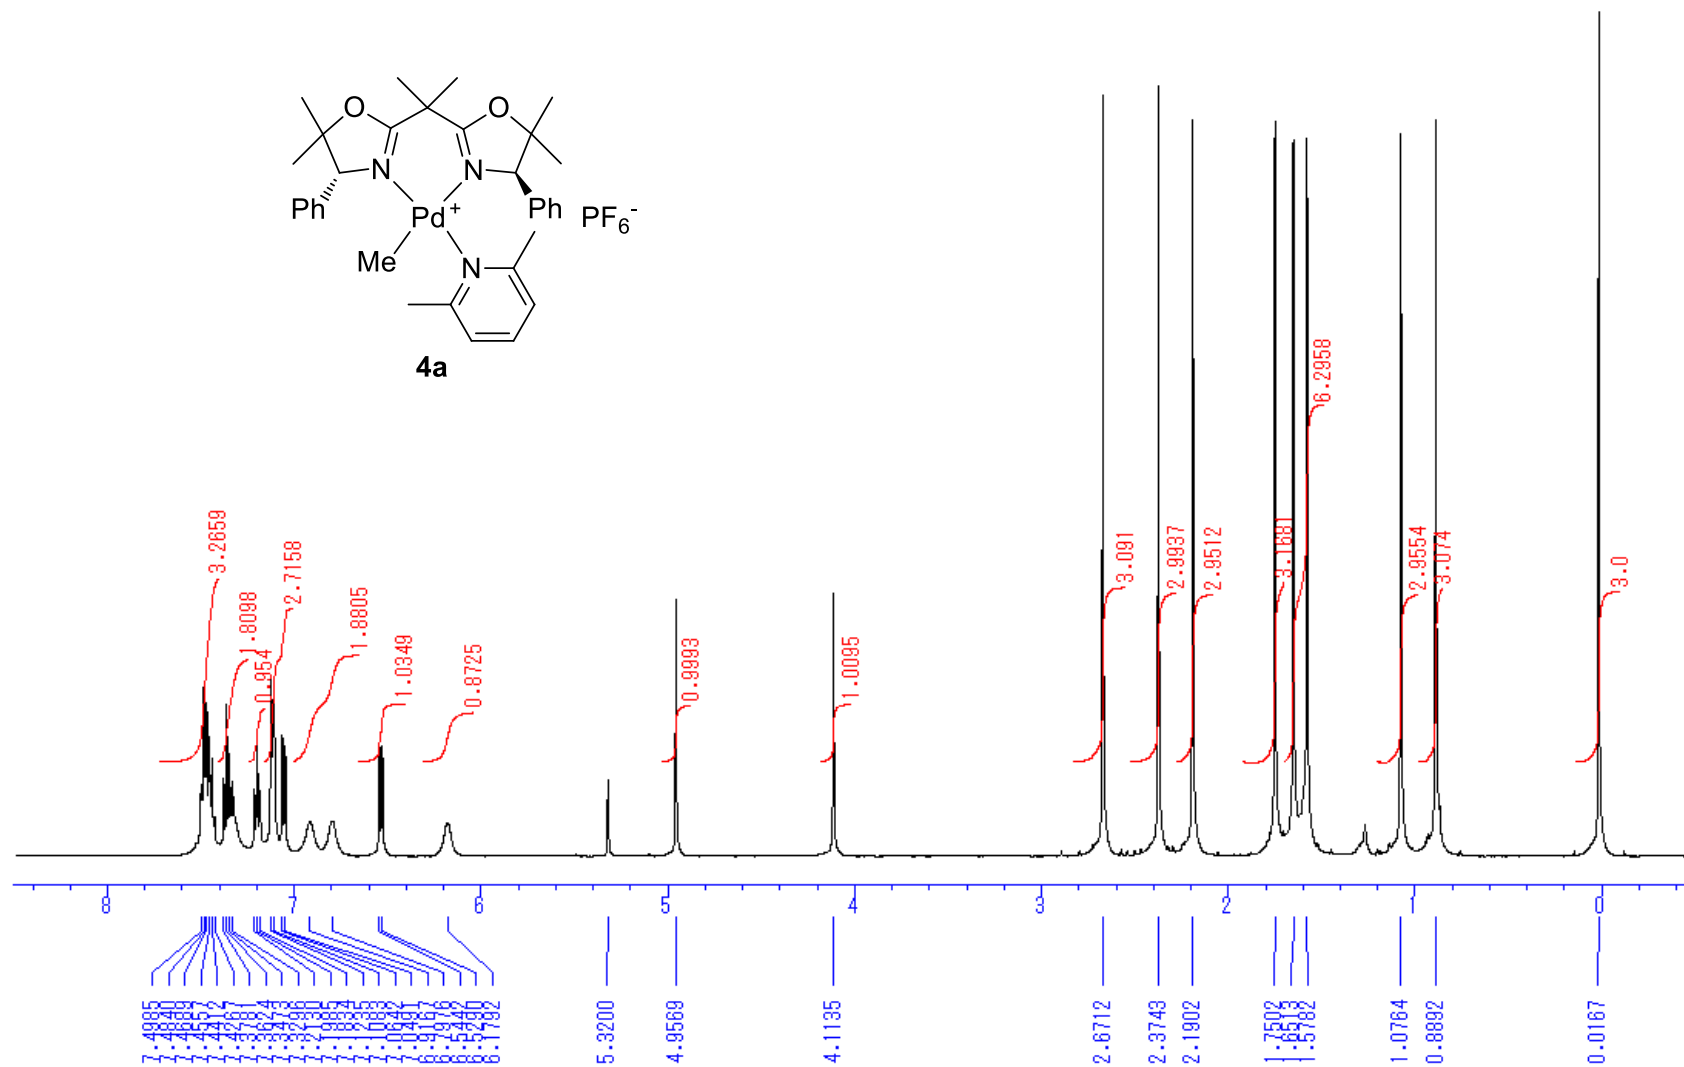

Figure S27. <sup>1</sup>H NMR Spectrum of [(BOX)PdMe(2,6-Me<sub>2</sub>C<sub>5</sub>H<sub>3</sub>N)]<sup>+</sup>PF<sub>6</sub><sup>-</sup> (4a).

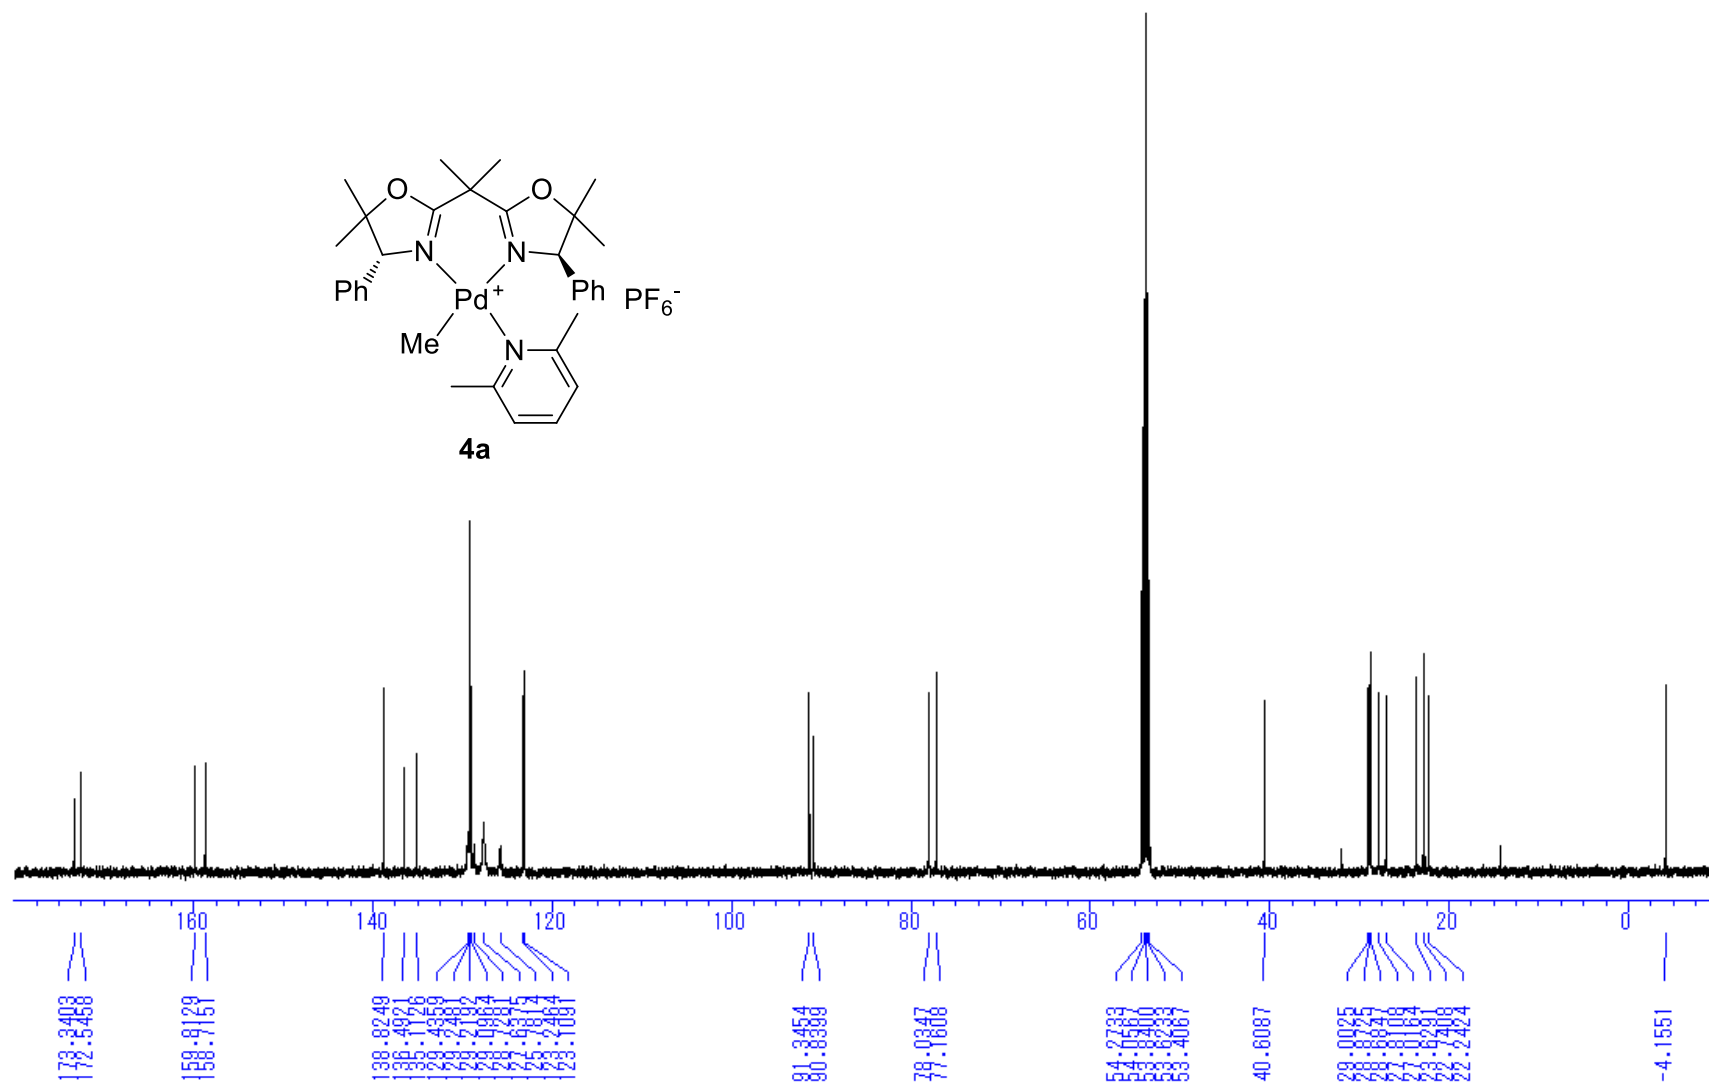

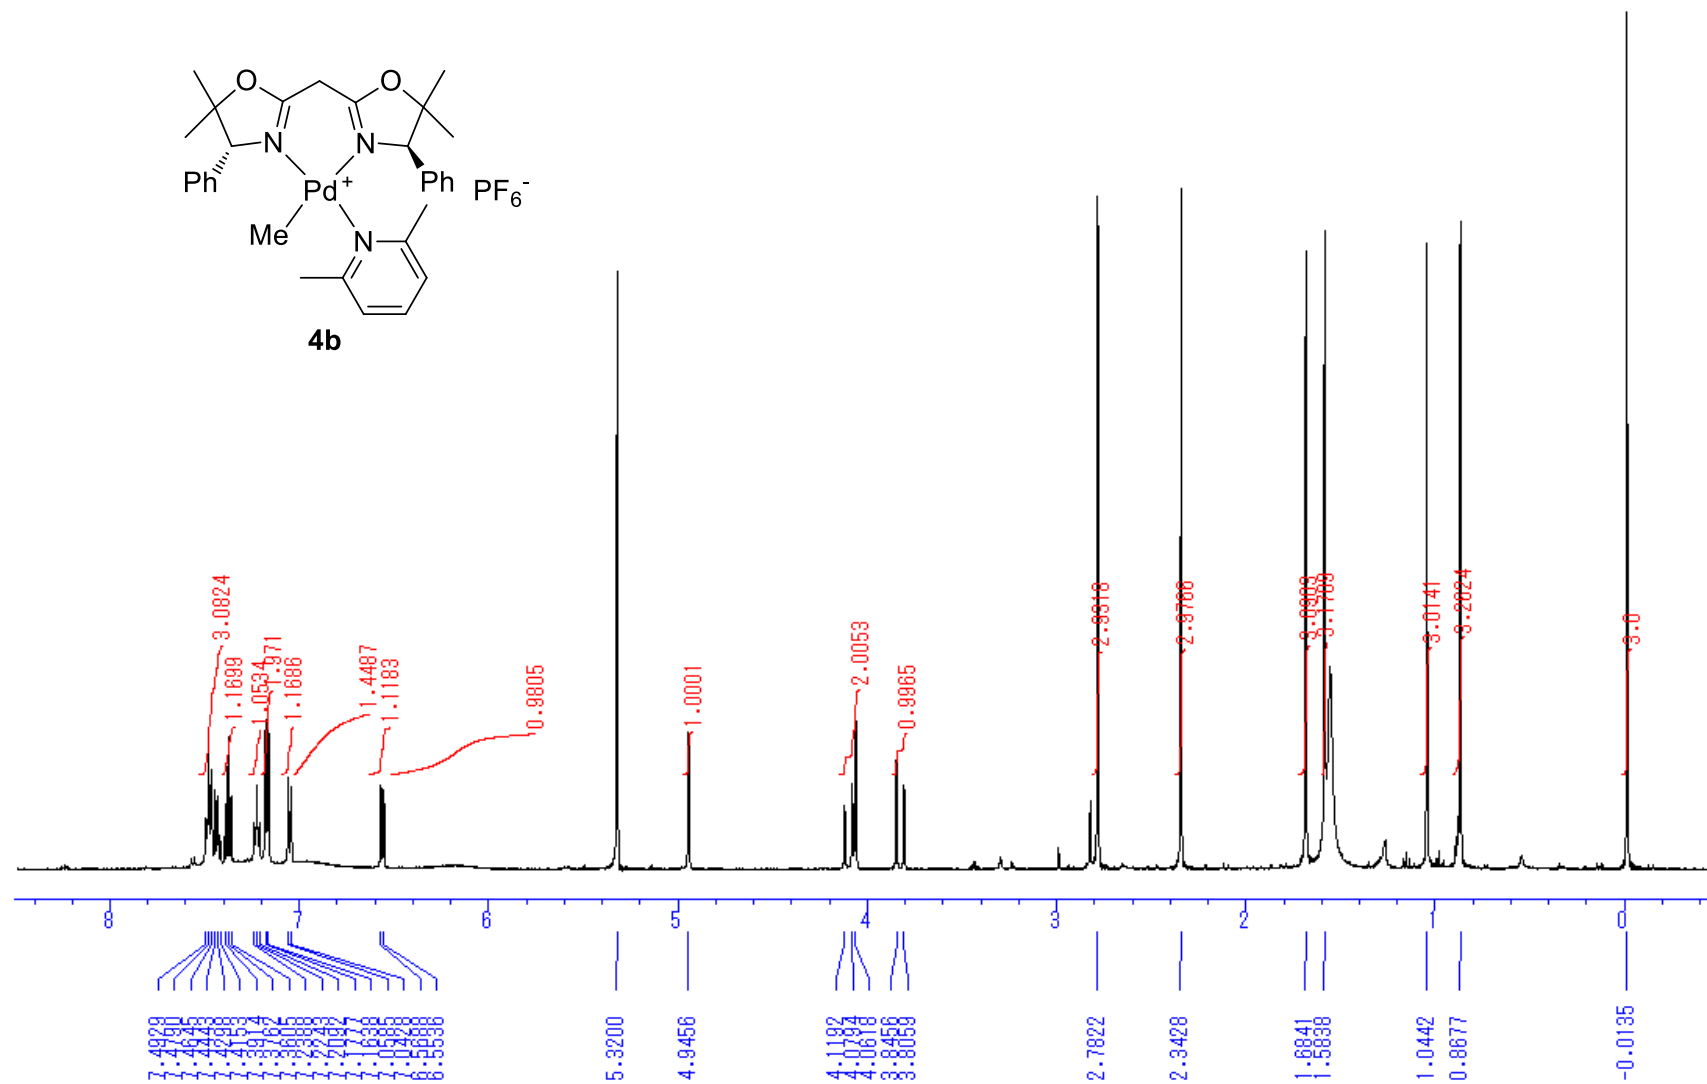

Figure S29.  $^1\text{H}$  NMR Spectrum of  $[(\text{BOX})\text{PdMe}(2,6\text{-Me}_2\text{C}_5\text{H}_3\text{N})]^+\text{PF}_6^-$  (**4b**).

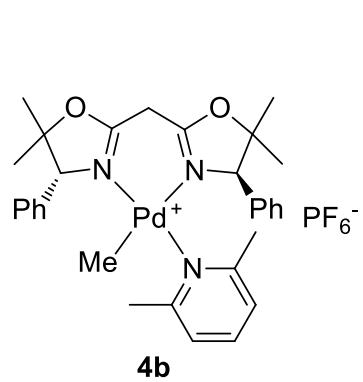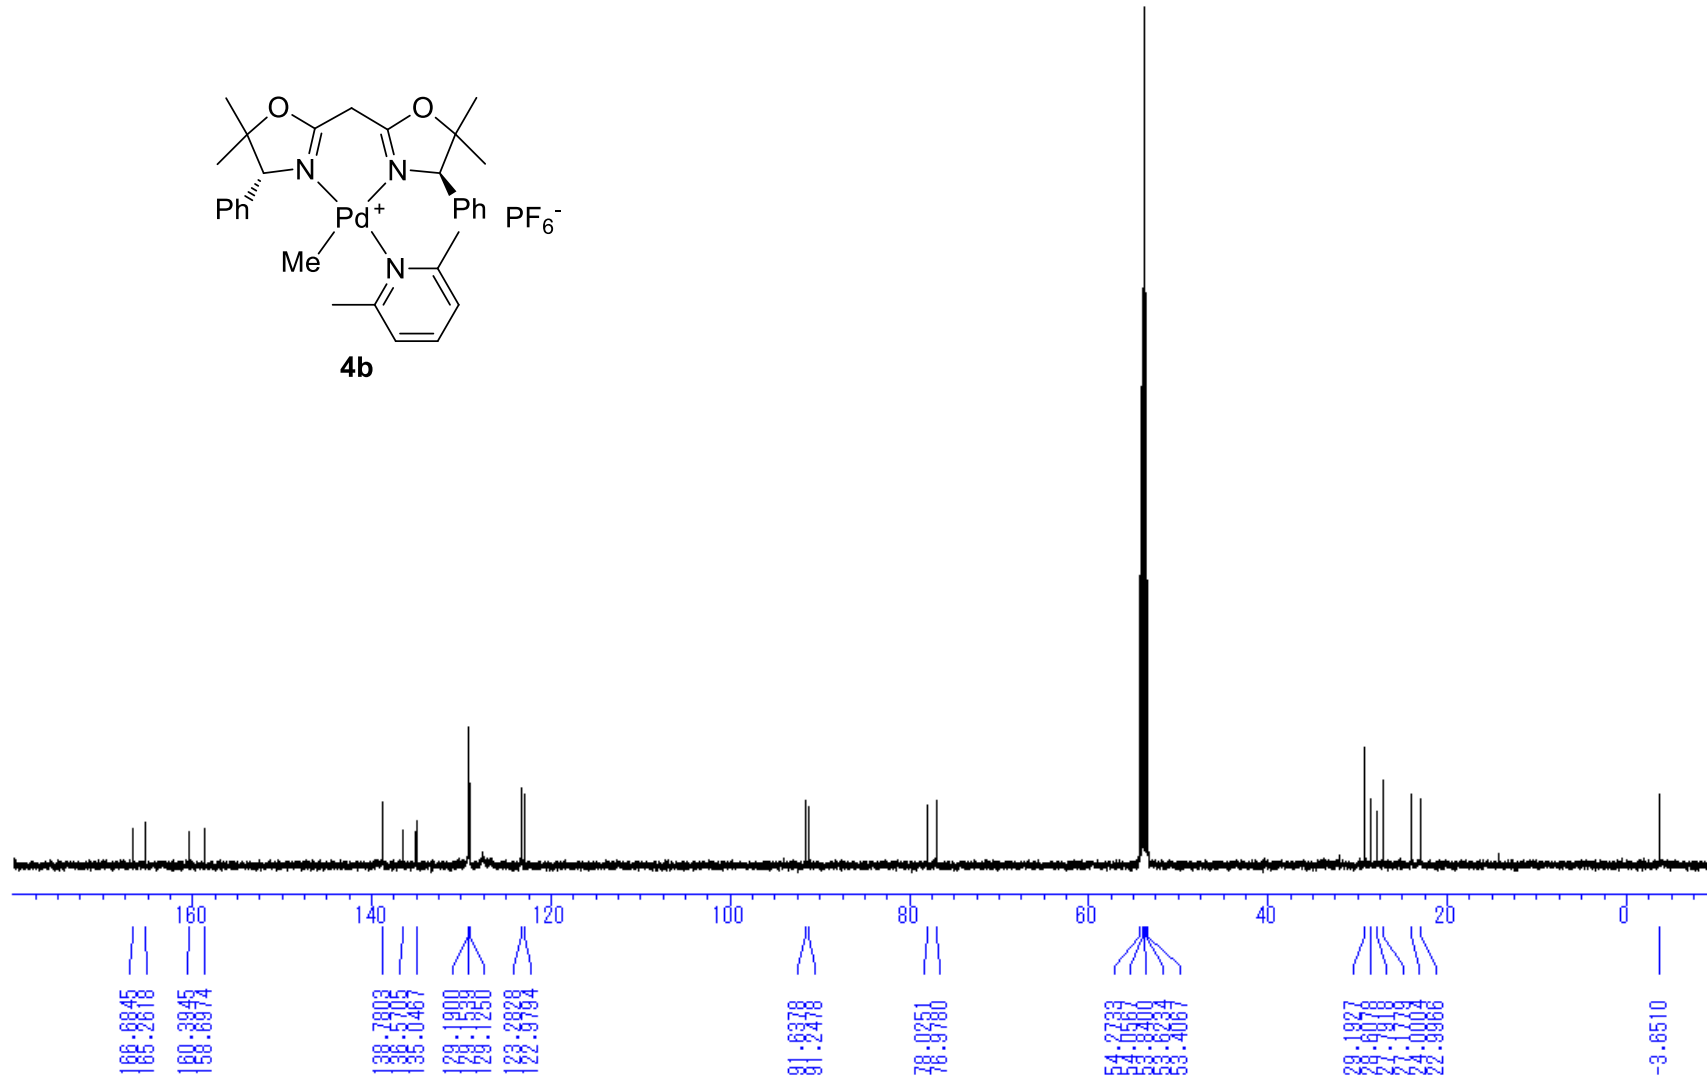

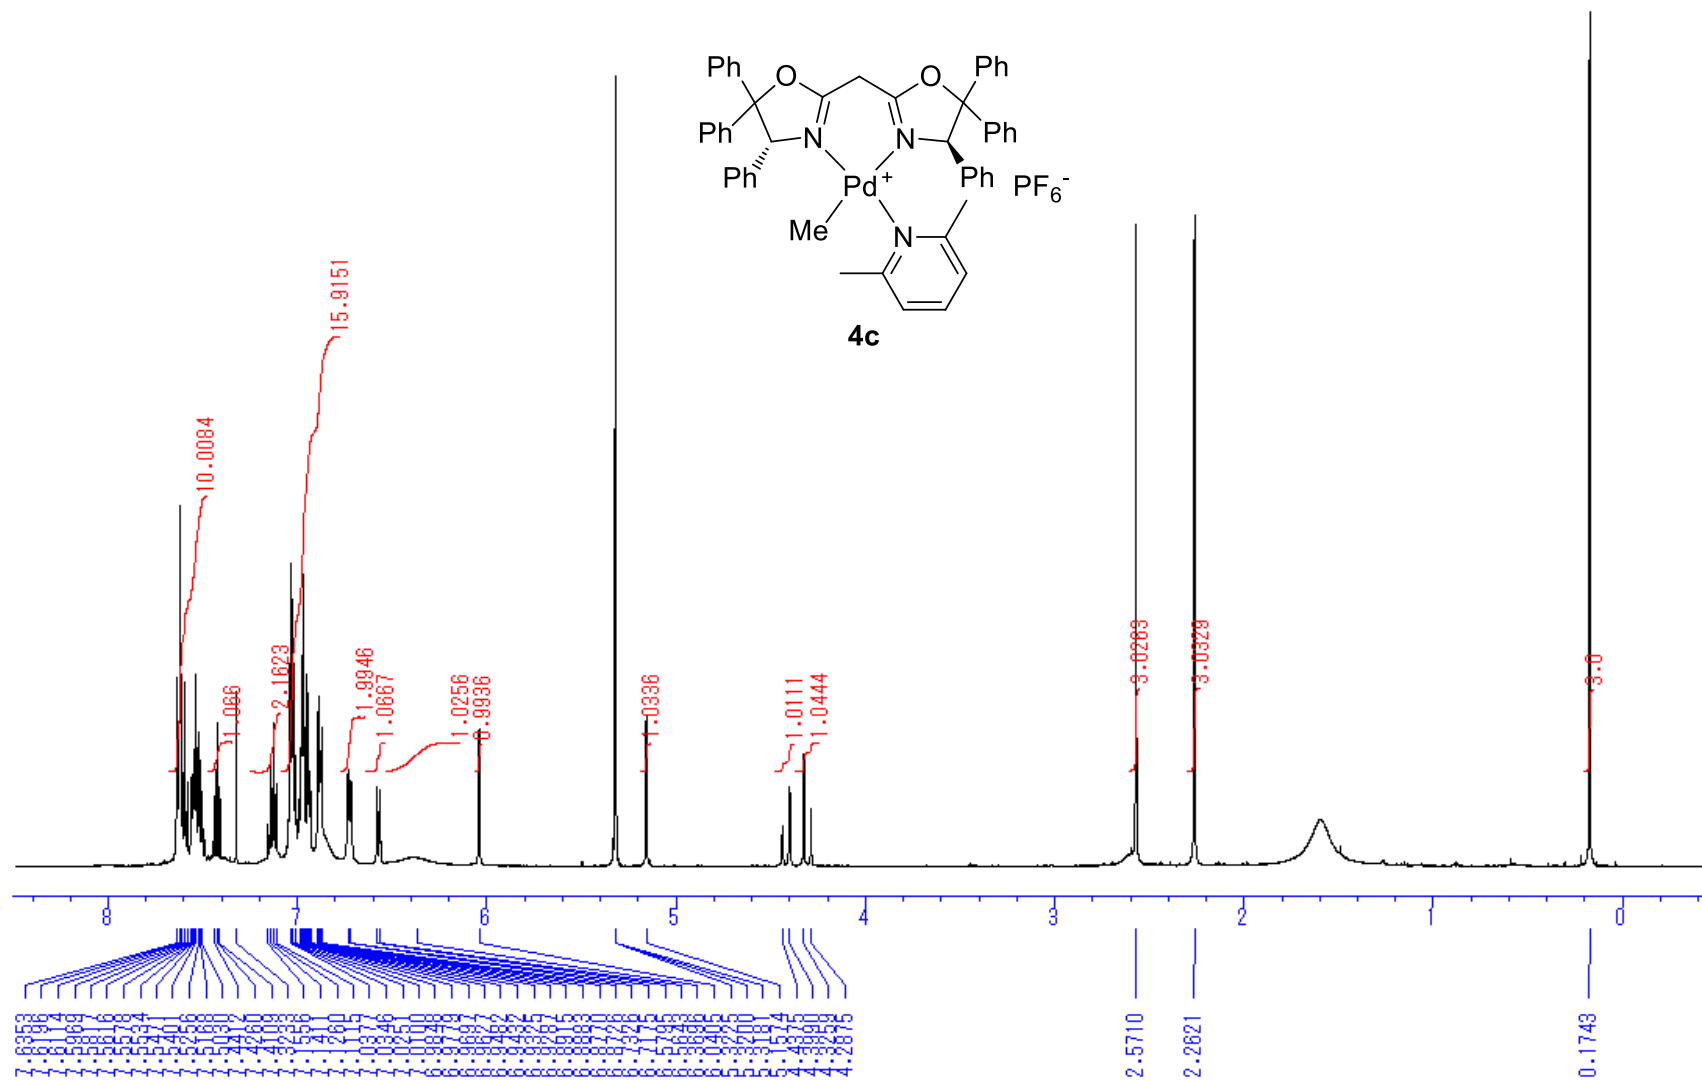

Figure S31. <sup>1</sup>H NMR Spectrum of [(BOX)PdMe(2,6-Me<sub>2</sub>C<sub>5</sub>H<sub>3</sub>N)]<sup>+</sup>PF<sub>6</sub><sup>-</sup> (4c).



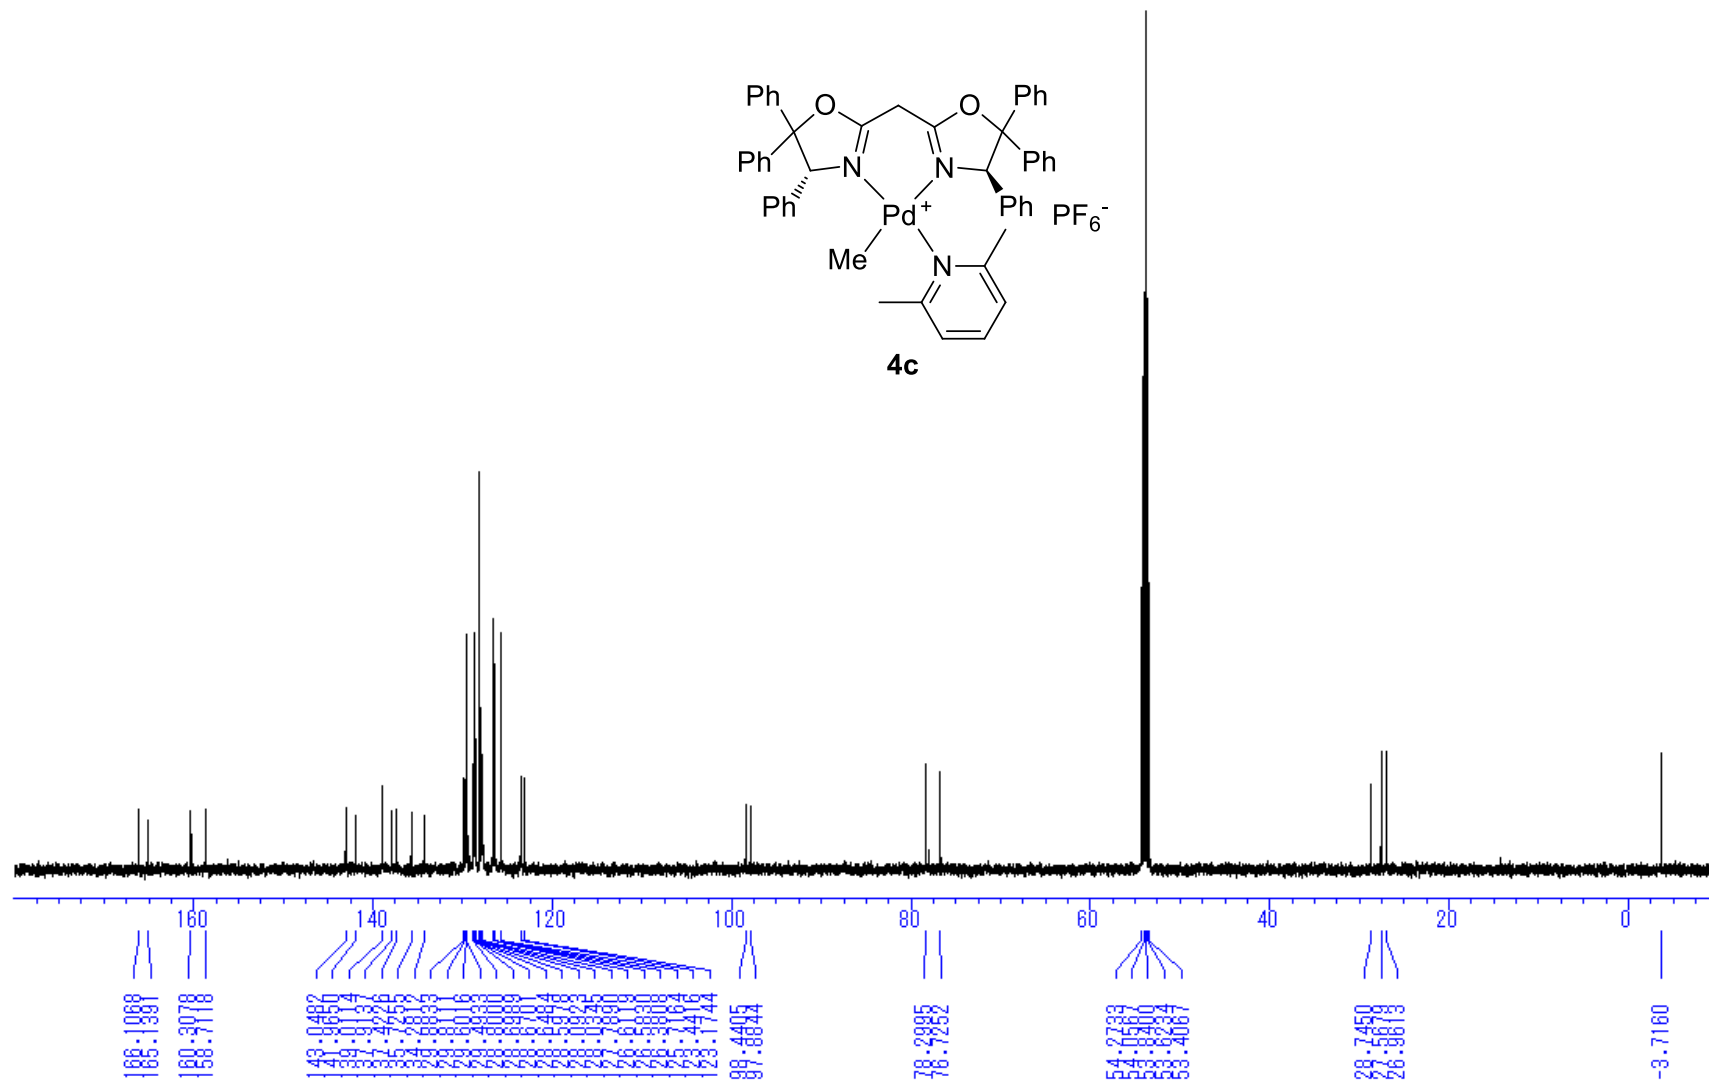

Figure S32.  $^{13}\text{C}$  NMR Spectrum of  $[(\text{BOX})\text{PdMe}(2,6\text{-Me}_2\text{C}_5\text{H}_3\text{N})]^+\text{PF}_6^-$  (**4c**).

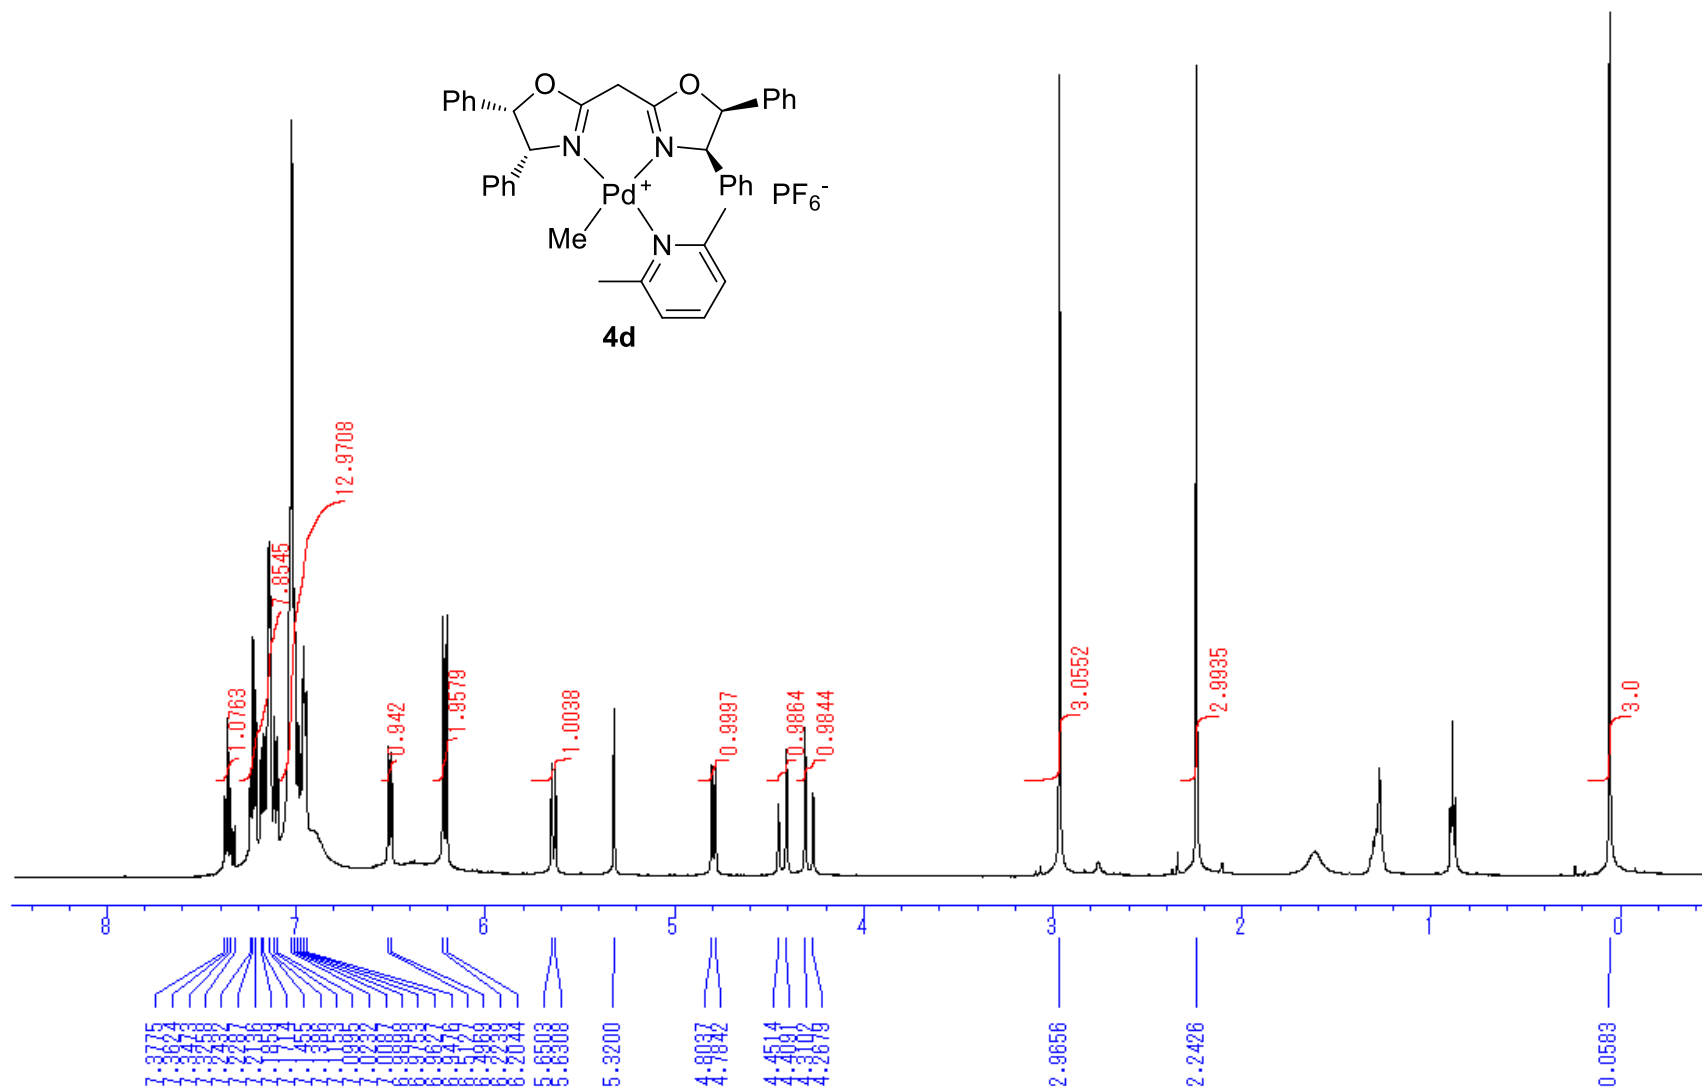

Figure S33. <sup>1</sup>H NMR Spectrum of [(BOX)PdMe(2,6-Me<sub>2</sub>C<sub>5</sub>H<sub>3</sub>N)]<sup>+</sup>PF<sub>6</sub><sup>-</sup> (**4d**).

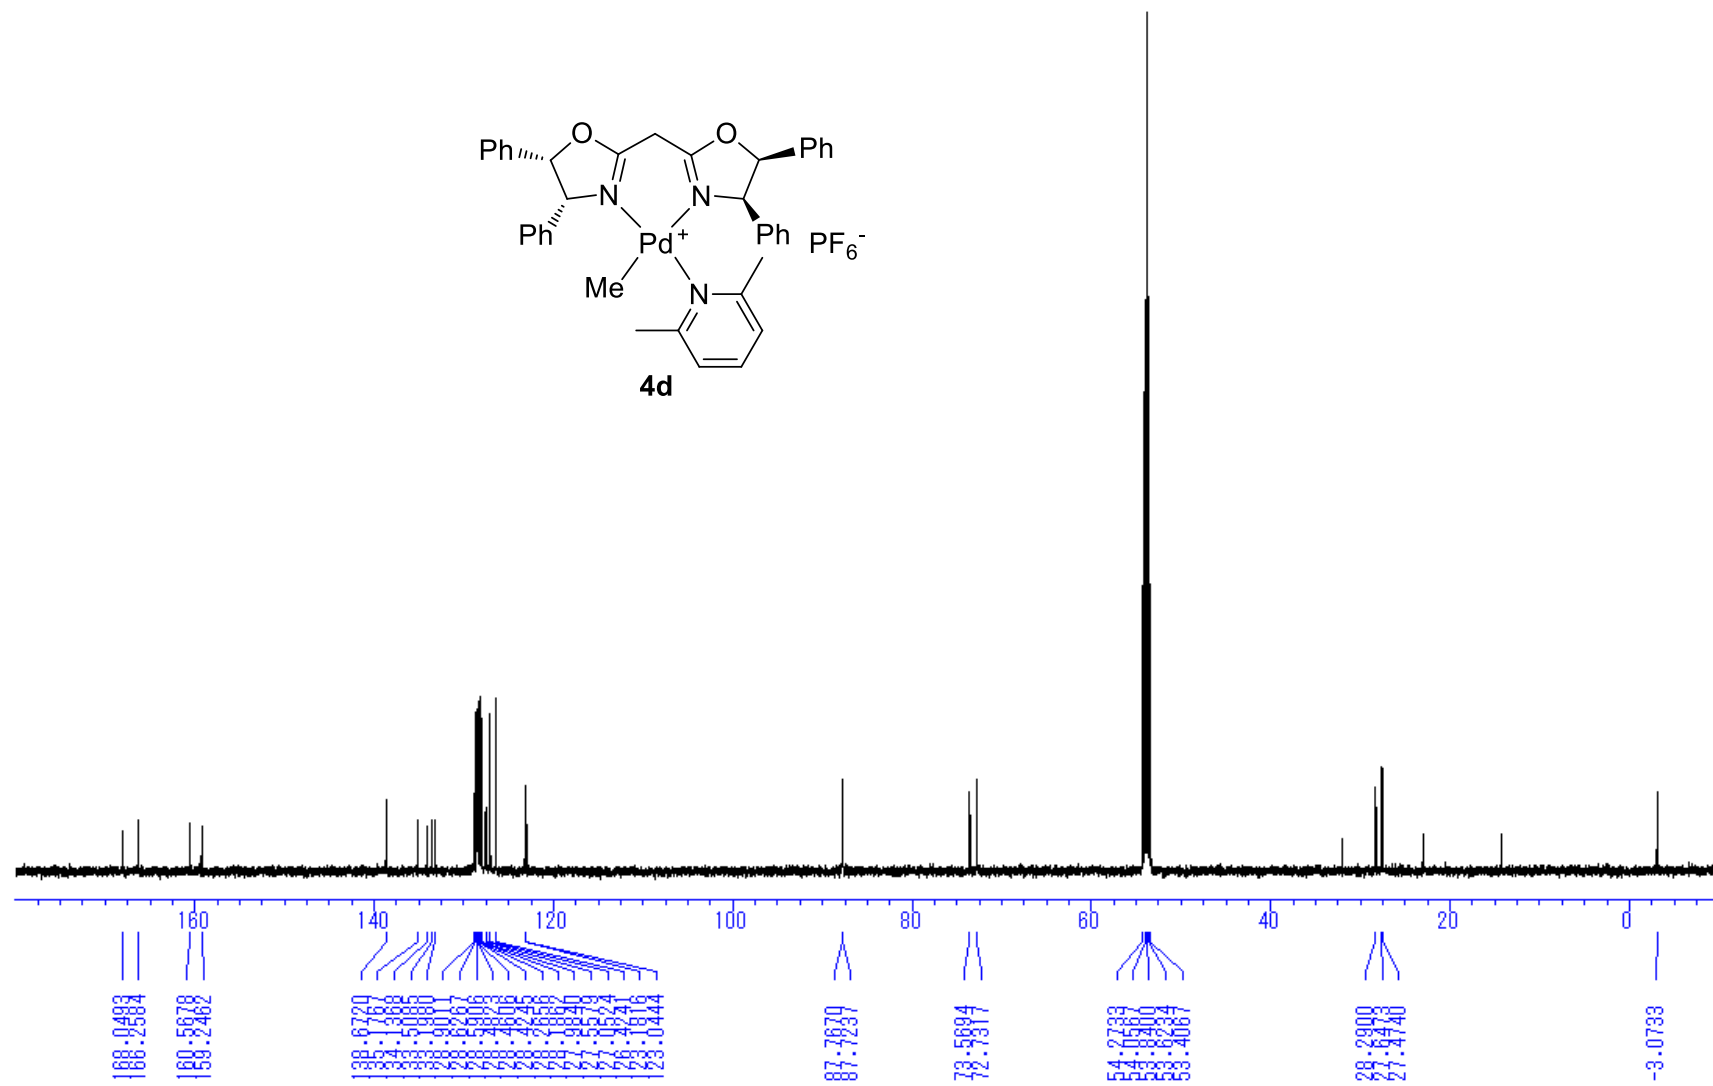

Figure S34. <sup>13</sup>C NMR Spectrum of [(BOX)PdMe(2,6-Me<sub>2</sub>C<sub>5</sub>H<sub>3</sub>N)]<sup>+</sup>PF<sub>6</sub><sup>-</sup> (4d).

1-7. NMR spectra of neutral (BOX)PdMe(2,6-Me<sub>2</sub>C<sub>5</sub>H<sub>3</sub>N) (5b-d).

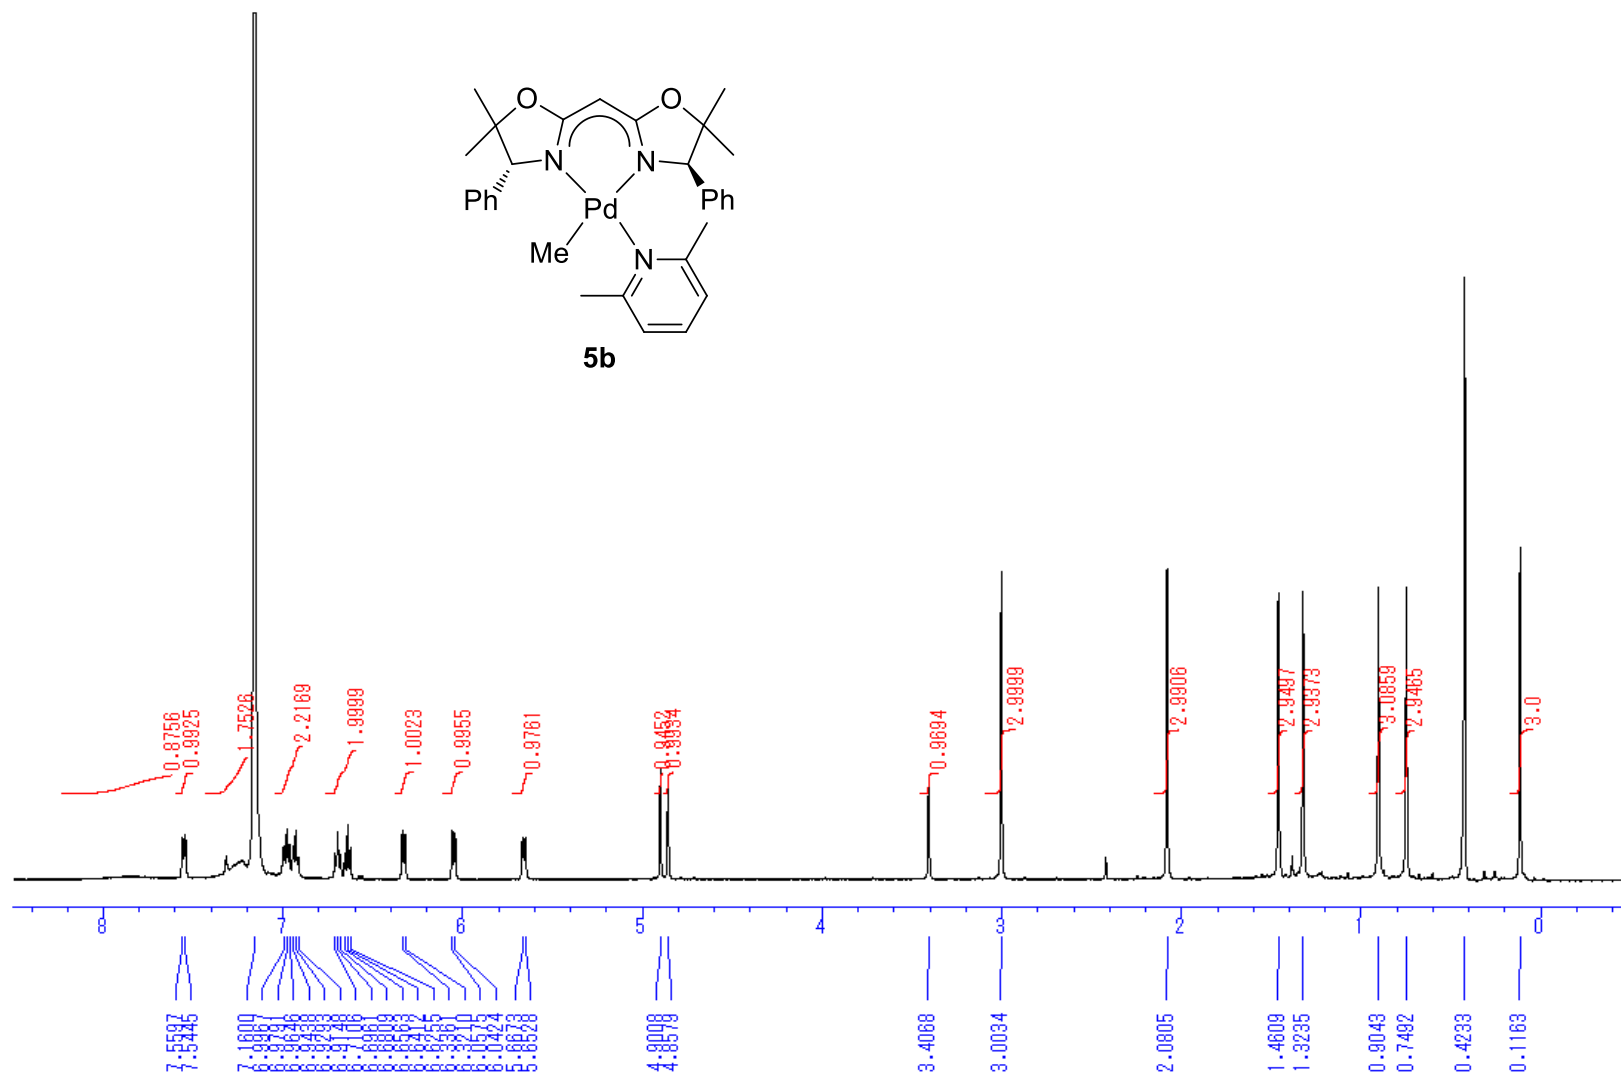

Figure S35. <sup>1</sup>H NMR Spectrum of (BOX)PdMe(2,6-Me<sub>2</sub>C<sub>5</sub>H<sub>3</sub>N) (5b).

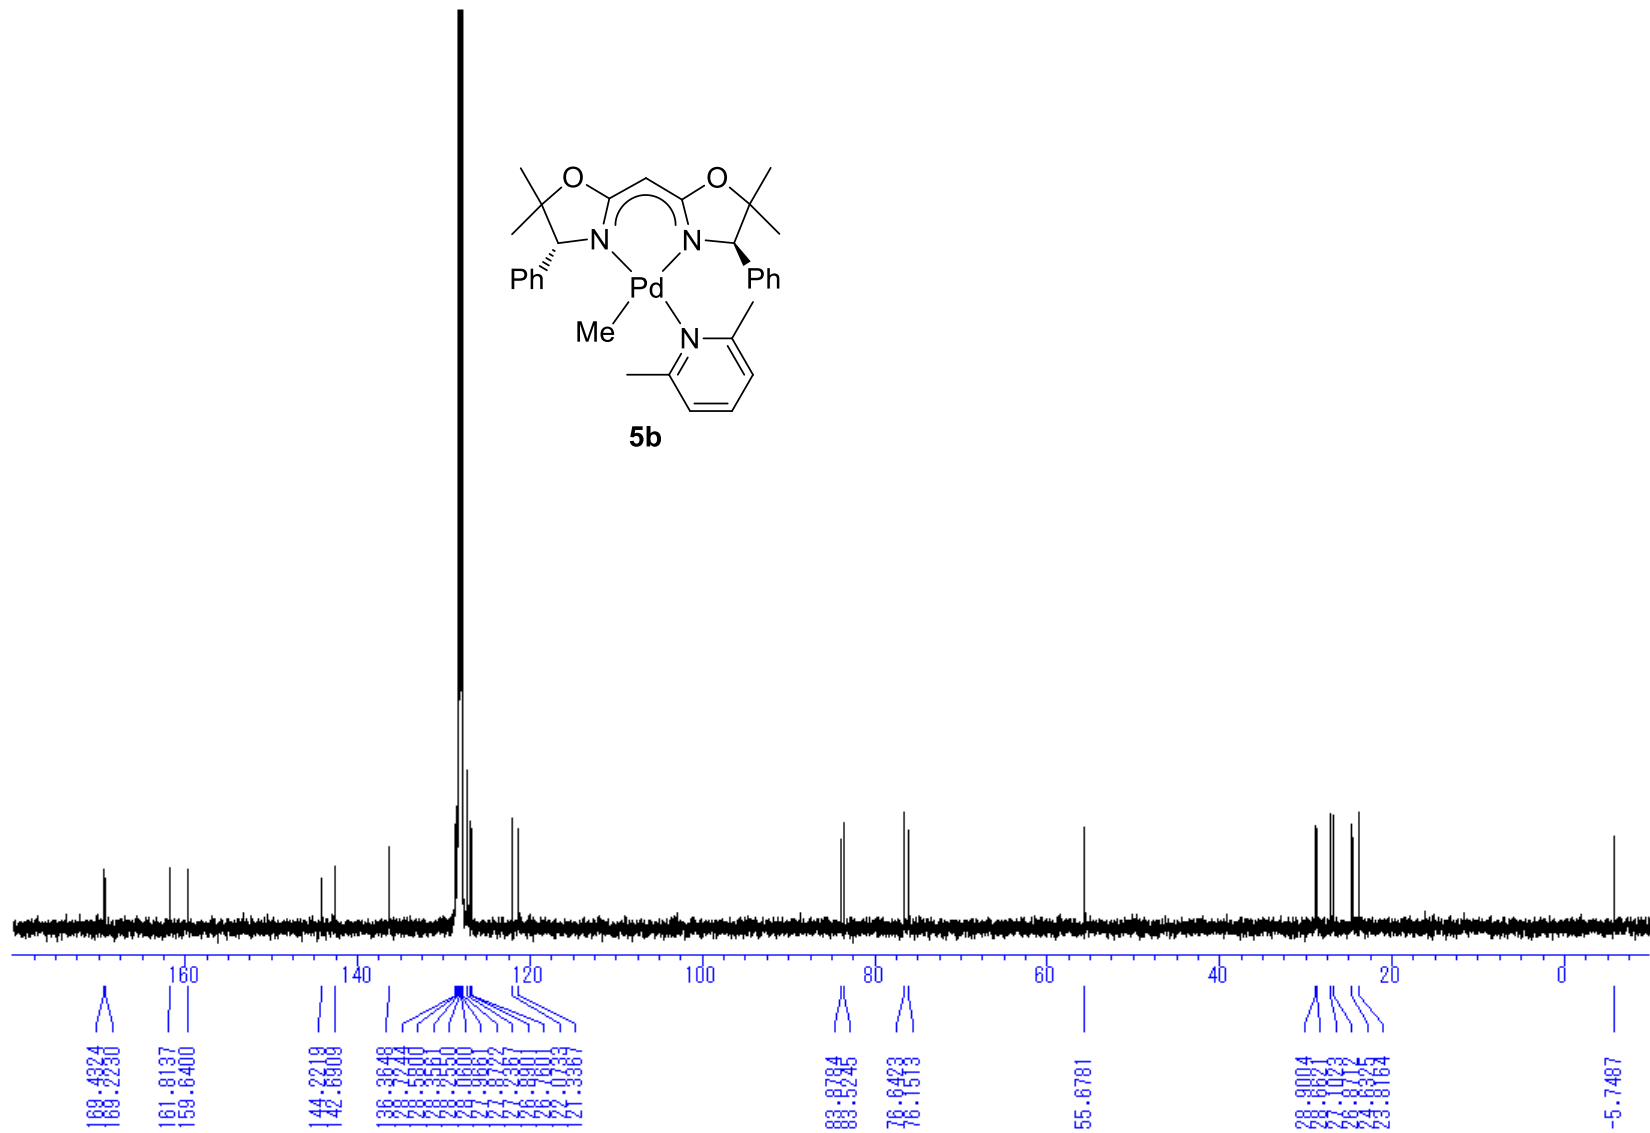

Figure S35. <sup>13</sup>C NMR Spectrum of (BOX)PdMe(2,6-Me<sub>2</sub>C<sub>5</sub>H<sub>3</sub>N) (5b).

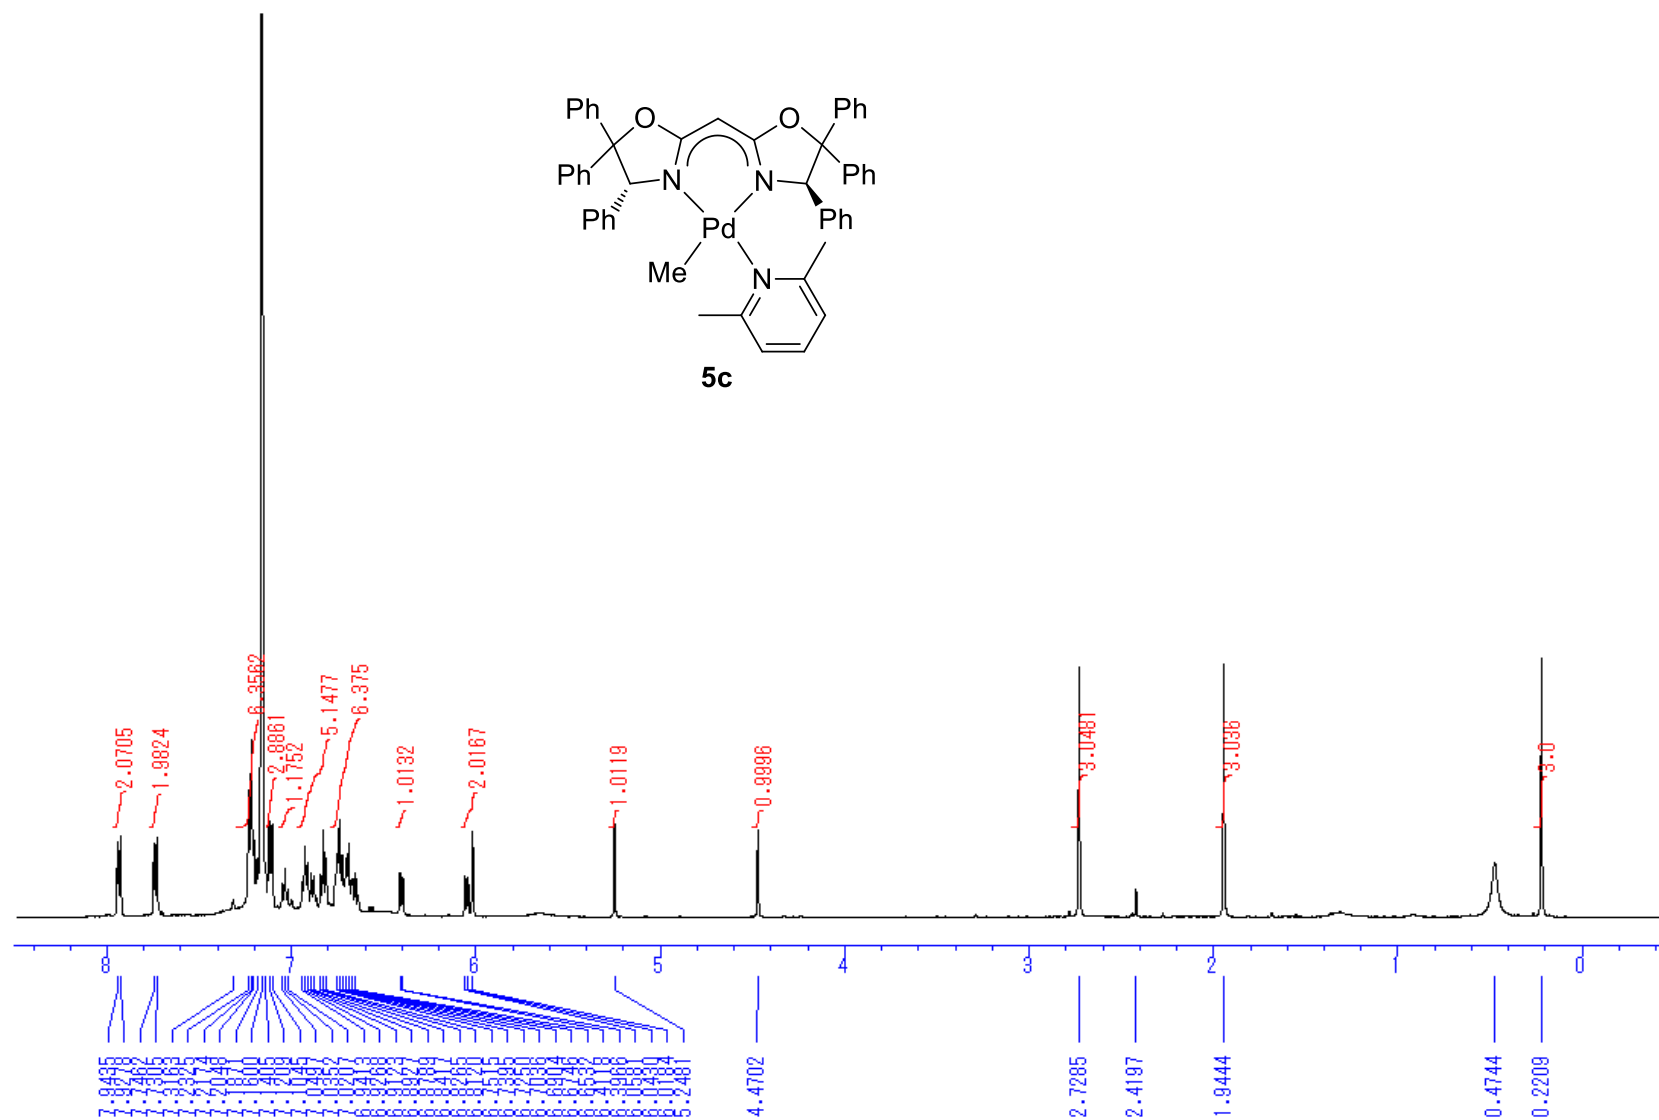

Figure S37. <sup>1</sup>H NMR Spectrum of (BOX)PdMe(2,6-Me<sub>2</sub>C<sub>5</sub>H<sub>3</sub>N) (5c).

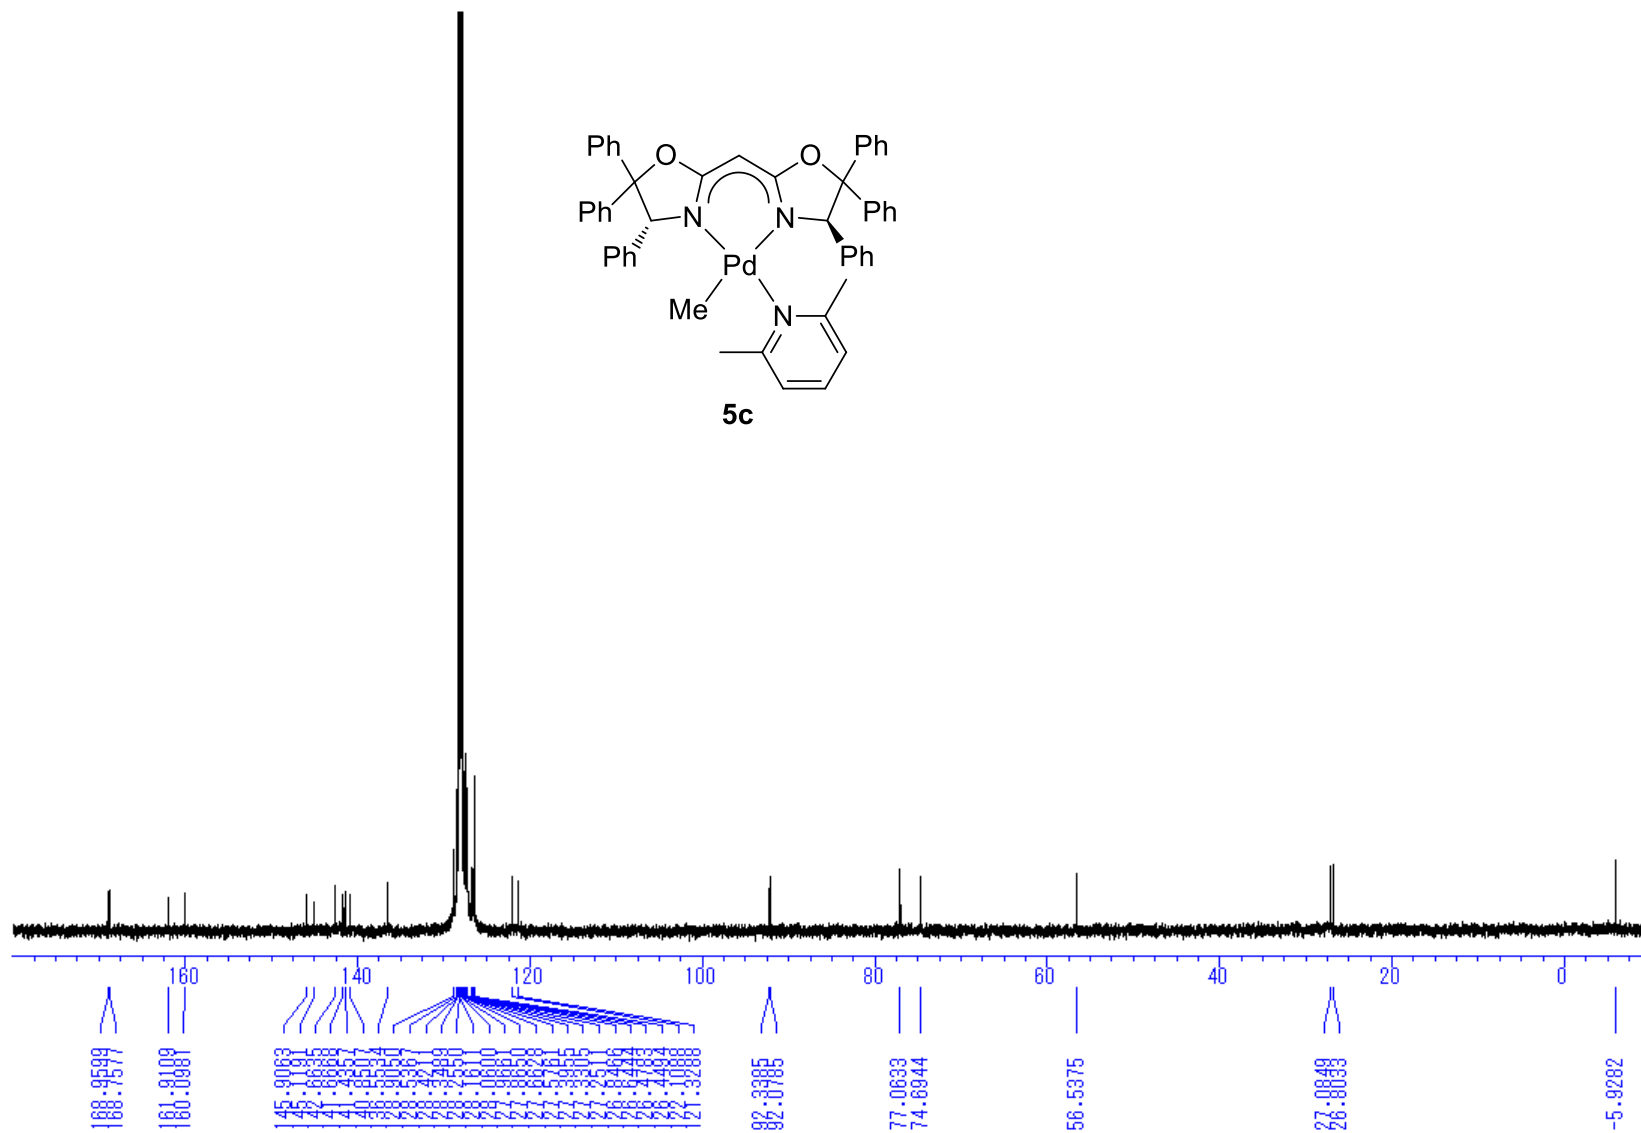

Figure S38.  $^{13}\text{C}$  NMR Spectrum of (BOX)PdMe(2,6-Me<sub>2</sub>C<sub>5</sub>H<sub>3</sub>N) (5c).

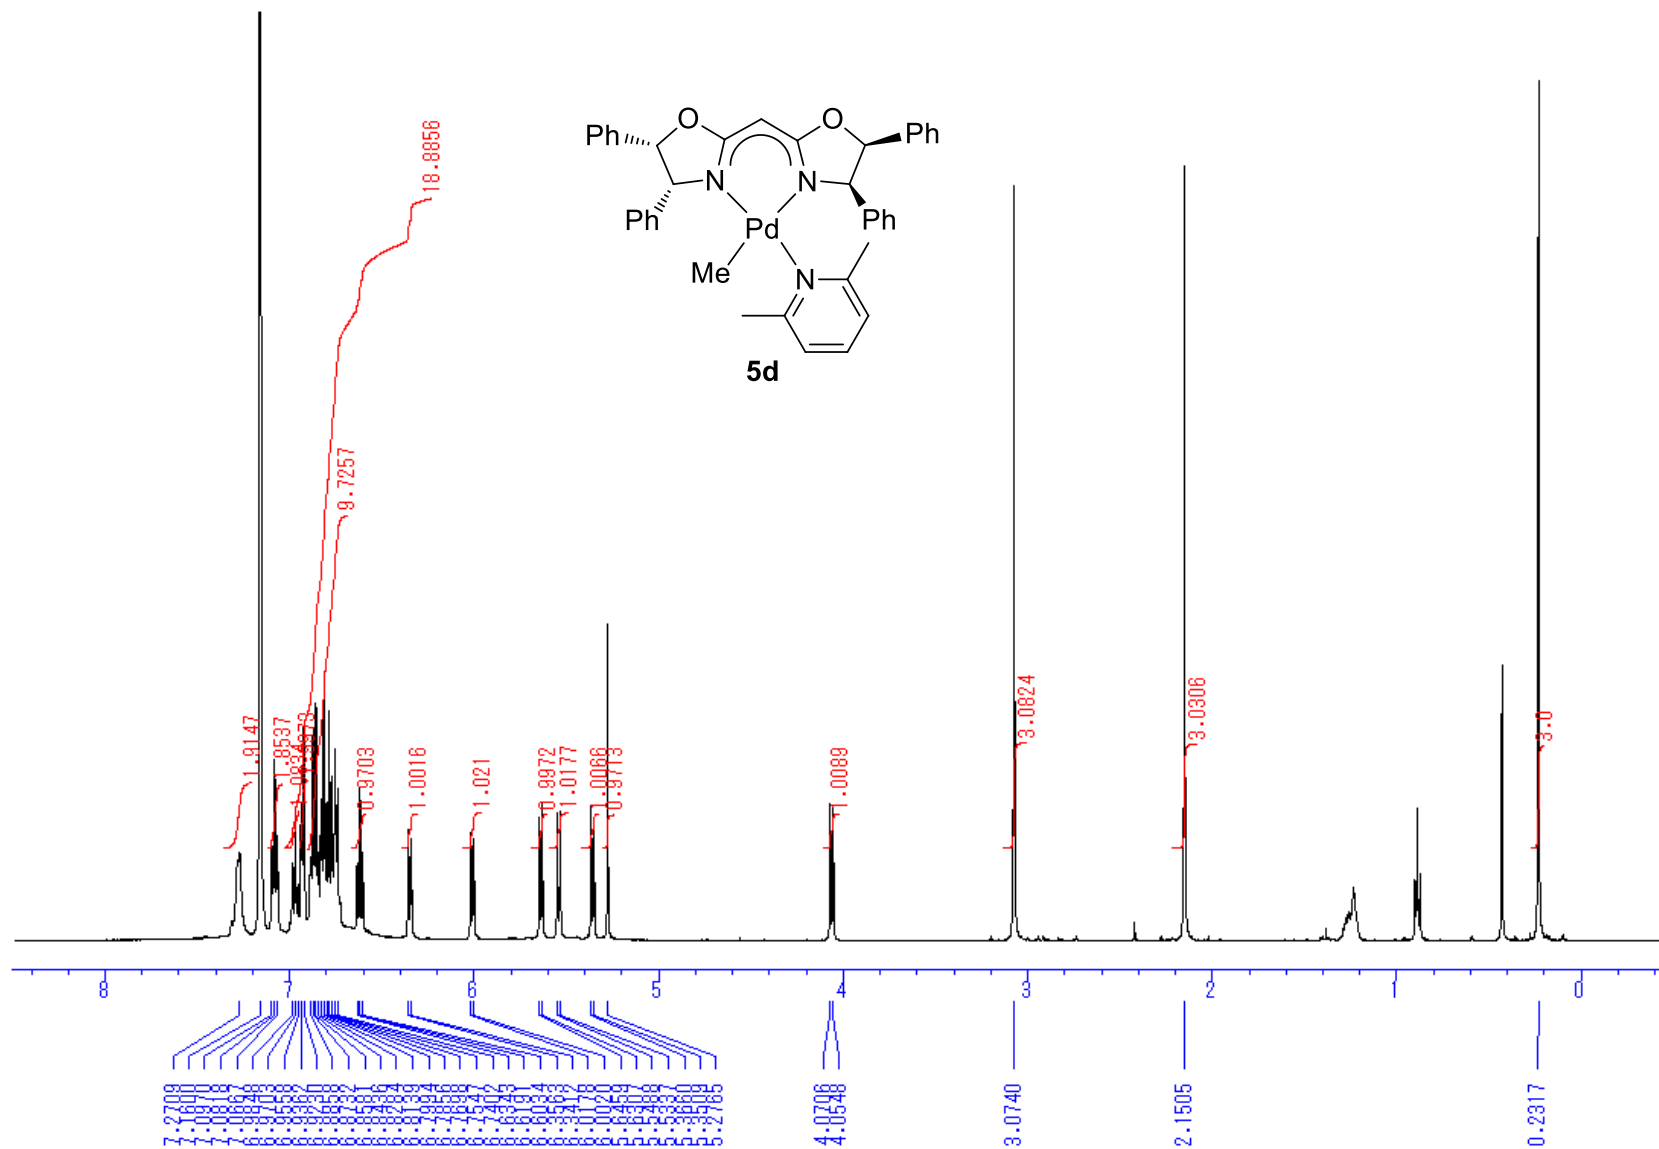

Figure S39. <sup>1</sup>H NMR Spectrum of (BOX)PdMe(2,6-Me<sub>2</sub>C<sub>5</sub>H<sub>3</sub>N) (5d).



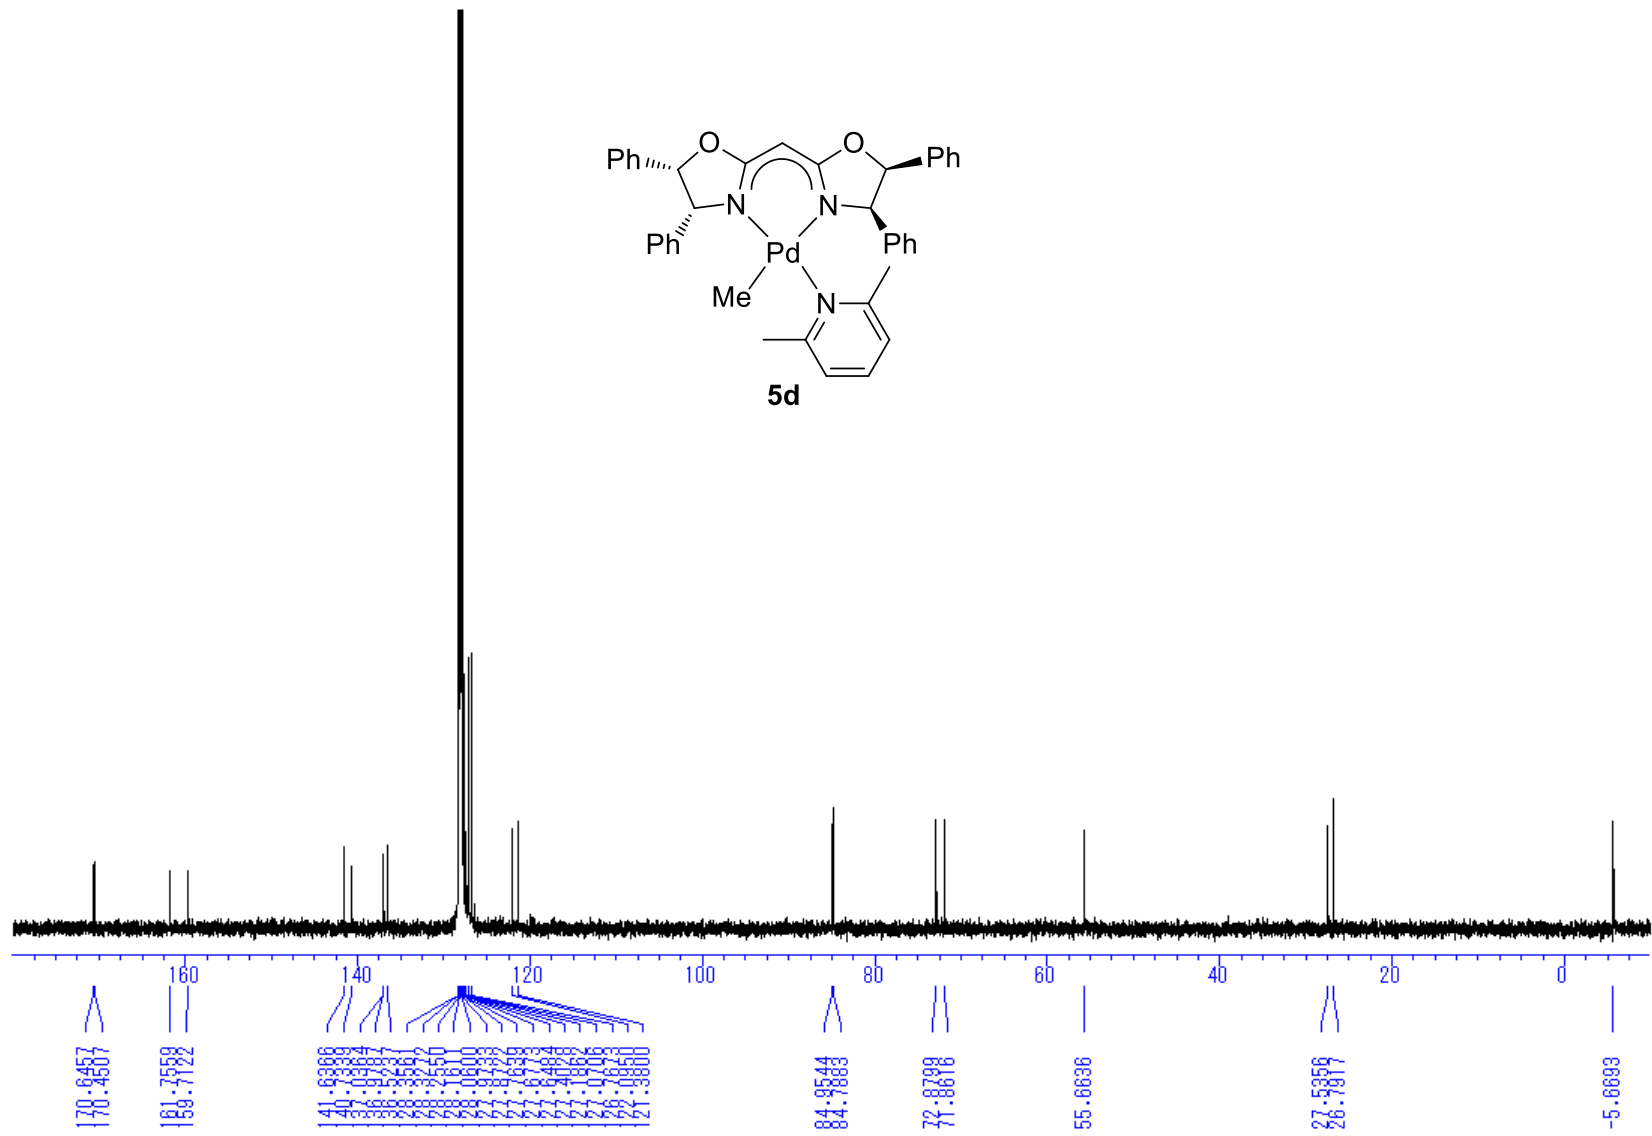

Figure S39. <sup>13</sup>C NMR Spectrum of (BOX)PdMe(2,6-Me<sub>2</sub>C<sub>5</sub>H<sub>3</sub>N) (5d).

## 2. Selected crystal collection parameters for BOX (1b-d), complex 2a-d, 3a, 3c, 4a, 5b.

**Table S1.** Crystal data and collection parameters of bis(oxazoline) ligands, BOX (1b–d).

|                                                                    | <b>1b</b>                                                     | <b>1c</b>                                                     | <b>1d</b>                                                         |
|--------------------------------------------------------------------|---------------------------------------------------------------|---------------------------------------------------------------|-------------------------------------------------------------------|
| Formula                                                            | C <sub>23</sub> H <sub>26</sub> N <sub>2</sub> O <sub>2</sub> | C <sub>43</sub> H <sub>34</sub> N <sub>2</sub> O <sub>2</sub> | 2(C <sub>31</sub> H <sub>26</sub> N <sub>2</sub> O <sub>2</sub> ) |
| Formula weight                                                     | 362.47                                                        | 610.75                                                        | 917.12                                                            |
| Crystal color,<br>Habit                                            | colorless, prism                                              | colorless, prism                                              | colorless, platelet                                               |
| Crystal size<br>(mm)                                               | 0.460×0.350×0.190                                             | 0.270×0.250×0.200                                             | 0.780×0.200×0.040                                                 |
| Crystal system                                                     | orthorhombic                                                  | tetragonal                                                    | monoclinic                                                        |
| Space group                                                        | P2 <sub>1</sub> 2 <sub>1</sub> 2 <sub>1</sub> (#19)           | P4 <sub>3</sub> (#78)                                         | P2 <sub>1</sub> (#4)                                              |
| <i>a</i> (Å)                                                       | 9.576(4)                                                      | 8.7744(4)                                                     | 14.65(2)                                                          |
| <i>b</i> (Å)                                                       | 11.843(4)                                                     | 8.7744(4)                                                     | 8.217(8)                                                          |
| <i>c</i> (Å)                                                       | 17.253(6)                                                     | 41.560(3)                                                     | 15.8576(5)                                                        |
| <i>α</i> (deg)                                                     | 90.0                                                          | 90.0                                                          | 90.0                                                              |
| <i>β</i> (deg)                                                     | 90.0                                                          | 90.0                                                          | 103.480(9)                                                        |
| <i>γ</i> (deg)                                                     | 90.0                                                          | 90.0                                                          | 90.0                                                              |
| <i>V</i> (Å <sup>3</sup> )                                         | 1956.6(13)                                                    | 3199.7(3)                                                     | 2464(4)                                                           |
| <i>Z</i> value                                                     | 4                                                             | 4                                                             | 2                                                                 |
| <i>D</i> <sub>calcd</sub> (g/cm <sup>3</sup> )                     | 1.230                                                         | 1.268                                                         | 1.236                                                             |
| <i>F</i> <sub>000</sub>                                            | 776.00                                                        | 1288.00                                                       | 968.00                                                            |
| Temp (K)                                                           | 93                                                            | 93                                                            | 93                                                                |
| <i>μ</i> (MoK $\alpha$ ) (cm <sup>-1</sup> )                       | 0.786                                                         | 0.774                                                         | 0.774                                                             |
| No. of<br>reflections<br>measured ( <i>R</i> <sub>int</sub> )      | 6866                                                          | 24001                                                         | 25775                                                             |
| 2 $\theta$ <sub>max</sub> (deg)                                    | 54.9                                                          | 54.9                                                          | 54.7                                                              |
| No. of<br>observations<br>[ <i>I</i> > 2.00 $\sigma$ ( <i>I</i> )] | 4431                                                          | 7075                                                          | 11073                                                             |
| No. of variables                                                   | 245                                                           | 425                                                           | 688                                                               |
| <i>R</i> 1 [ <i>I</i> > 2.00 $\sigma$ ( <i>I</i> )]                | 0.0336                                                        | 0.0343                                                        | 0.0449                                                            |
| <i>wR</i> 2 [All<br>reflections]                                   | 0.0854                                                        | 0.0790                                                        | 0.1097                                                            |
| Goodness of Fit                                                    | 1.086                                                         | 1.049                                                         | 1.100                                                             |

**Table S2.** Crystal data and collection parameters of (BOX)PdCl<sub>2</sub> (**2a-d**).

|                                                                    | <b>2a</b>                                                                        | <b>2b</b>                                                                           | <b>2c</b>                                                                                                                | <b>2d</b>                                                                                                            |
|--------------------------------------------------------------------|----------------------------------------------------------------------------------|-------------------------------------------------------------------------------------|--------------------------------------------------------------------------------------------------------------------------|----------------------------------------------------------------------------------------------------------------------|
| Formula                                                            | C <sub>25</sub> H <sub>30</sub> Cl <sub>2</sub> N <sub>2</sub> O <sub>2</sub> Pd | 4[C <sub>23</sub> H <sub>26</sub> Cl <sub>2</sub> N <sub>2</sub> O <sub>2</sub> Pd] | C <sub>43</sub> H <sub>34</sub> Cl <sub>2</sub> N <sub>2</sub> O <sub>2</sub> Pd,<br>2[CH <sub>2</sub> Cl <sub>2</sub> ] | C <sub>31</sub> H <sub>26</sub> Cl <sub>2</sub> N <sub>2</sub> O <sub>2</sub> Pd,<br>CH <sub>2</sub> Cl <sub>2</sub> |
| Formula weight                                                     | 567.83                                                                           | 2159.11                                                                             | 957.93                                                                                                                   | 720.80                                                                                                               |
| Crystal color,<br>Habit                                            | yellow, prism                                                                    | yellow, prism                                                                       | yellow, prism                                                                                                            | yellow, block                                                                                                        |
| Crystal size (mm)                                                  | 0.480×0.150×0.100                                                                | 0.340×0.180×0.15                                                                    | 0.230×0.230×0.18                                                                                                         | 0.310×0.270×0.21                                                                                                     |
|                                                                    |                                                                                  | 0                                                                                   | 0                                                                                                                        | 0                                                                                                                    |
| Crystal system                                                     | monoclinic                                                                       | monoclinic                                                                          | monoclinic                                                                                                               | orthorhombic                                                                                                         |
| Space group                                                        | P2 <sub>1</sub> (#4)                                                             | C2 (#5)                                                                             | C2 (#5)                                                                                                                  | P2 <sub>1</sub> 2 <sub>1</sub> 2 <sub>1</sub> (#19)                                                                  |
| <i>a</i> (Å)                                                       | 9.741(7)                                                                         | 24.590(3)                                                                           | 24.861(10)                                                                                                               | 7.246(3)                                                                                                             |
| <i>b</i> (Å)                                                       | 12.154(8)                                                                        | 14.0600(15)                                                                         | 8.317(3)                                                                                                                 | 15.177(6)                                                                                                            |
| <i>c</i> (Å)                                                       | 11.342(8)                                                                        | 29.311(4)                                                                           | 11.649(5)                                                                                                                | 27.755(13)                                                                                                           |
| <i>α</i> (deg)                                                     | 90.0                                                                             | 90.0                                                                                | 90.0                                                                                                                     | 90.0                                                                                                                 |
| <i>β</i> (deg)                                                     | 110.438(7)                                                                       | 111.574(2)                                                                          | 113.088(5)                                                                                                               | 90.0                                                                                                                 |
| <i>γ</i> (deg)                                                     | 90.0                                                                             | 90.0                                                                                | 90.0                                                                                                                     | 90.0                                                                                                                 |
| <i>V</i> (Å <sup>3</sup> )                                         | 1258(2)                                                                          | 9424(2)                                                                             | 2216(2)                                                                                                                  | 3052(3)                                                                                                              |
| <i>Z</i> value                                                     | 2                                                                                | 4                                                                                   | 2                                                                                                                        | 4                                                                                                                    |
| <i>D</i> <sub>calcd</sub> (g/cm <sup>3</sup> )                     | 1.499                                                                            | 1.522                                                                               | 1.436                                                                                                                    | 1.568                                                                                                                |
| <i>F</i> <sub>000</sub>                                            | 580.00                                                                           | 4384.00                                                                             | 972.00                                                                                                                   | 1456.00                                                                                                              |
| Temp (K)                                                           | 93                                                                               | 93                                                                                  | 93                                                                                                                       | 93                                                                                                                   |
| <i>μ</i> (MoK $\alpha$ ) (cm <sup>-1</sup> )                       | 9.740                                                                            | 10.360                                                                              | 8.187                                                                                                                    | 9.908                                                                                                                |
| No. of reflections<br>measured ( <i>R</i> <sub>int</sub> )         | 13194                                                                            | 77840                                                                               | 11647                                                                                                                    | 31173                                                                                                                |
| 2 $\theta$ <sub>max</sub> (deg)                                    | 55.0                                                                             | 55.1                                                                                | 54.9                                                                                                                     | 55.0                                                                                                                 |
| No. of<br>observations<br>[ <i>I</i> > 2.00 $\sigma$ ( <i>I</i> )] | 5711                                                                             | 20822                                                                               | 5026                                                                                                                     | 7010                                                                                                                 |
| No. of variables                                                   | 290                                                                              | 1082                                                                                | 259                                                                                                                      | 371                                                                                                                  |
| <i>R</i> 1 [ <i>I</i> > 2.00 $\sigma$ ( <i>I</i> )]                | 0.0279                                                                           | 0.0252                                                                              | 0.0238                                                                                                                   | 0.0246                                                                                                               |
| <i>wR</i> 2 [All<br>reflections]                                   | 0.0731                                                                           | 0.0648                                                                              | 0.0600                                                                                                                   | 0.0571                                                                                                               |
| Goodness of Fit                                                    | 1.114                                                                            | 1.098                                                                               | 1.040                                                                                                                    | 1.086                                                                                                                |

**Table S3.** Crystal data and collection parameters of (BOX)PdMeCl (**3a**, **c**), cationic [(BOX)PdMe(2,6-Me<sub>2</sub>C<sub>5</sub>H<sub>3</sub>N)]<sup>+</sup>PF<sub>6</sub><sup>-</sup> (**4a**), and neutral (BOX)PdMe(2,6-Me<sub>2</sub>C<sub>5</sub>H<sub>3</sub>N) (**5b**).

|                                                                    | <b>3a</b>                                                             | <b>3c</b>                                                                                    | <b>4a</b>                                                                        | <b>5b</b>                                                                                             |
|--------------------------------------------------------------------|-----------------------------------------------------------------------|----------------------------------------------------------------------------------------------|----------------------------------------------------------------------------------|-------------------------------------------------------------------------------------------------------|
| Formula                                                            | 2[C <sub>26</sub> H <sub>33</sub> ClN <sub>2</sub> O <sub>2</sub> Pd] | C <sub>44</sub> H <sub>36</sub> ClN <sub>2</sub> O <sub>2</sub> Pd,<br>0.5[H <sub>2</sub> O] | C <sub>31</sub> H <sub>38</sub> F <sub>6</sub> N <sub>3</sub> O <sub>2</sub> PPd | C <sub>31</sub> H <sub>37</sub> N <sub>3</sub> O <sub>2</sub> Pd,<br>C <sub>2</sub> H <sub>5</sub> OH |
| Formula weight                                                     | 1094.82                                                               | 775.64                                                                                       | 736.02                                                                           | 636.12                                                                                                |
| Crystal color,<br>Habit                                            | yellow, prism                                                         | yellow, prism                                                                                | yellow, prism                                                                    | colorless, prism                                                                                      |
| Crystal size (mm)                                                  | 0.200×0.160×0.070                                                     | 0.310×0.120×0.060                                                                            | 0.340×0.170×0.130                                                                | 0.570×0.090×0.070                                                                                     |
| Crystal system                                                     | monoclinic                                                            | orthorhombic                                                                                 | orthorhombic                                                                     | orthorhombic                                                                                          |
| Space group                                                        | P2 <sub>1</sub> (#4)                                                  | P2 <sub>1</sub> 2 <sub>1</sub> 2 <sub>1</sub> (#19)                                          | P2 <sub>1</sub> 2 <sub>1</sub> 2 <sub>1</sub> (#19)                              | P2 <sub>1</sub> 2 <sub>1</sub> 2 <sub>1</sub> (#19)                                                   |
| <i>a</i> (Å)                                                       | 9.073(2)                                                              | 8.7555(18)                                                                                   | 12.381(3)                                                                        | 9.5275(8)                                                                                             |
| <i>b</i> (Å)                                                       | 14.749(3)                                                             | 15.173(3)                                                                                    | 14.812(3)                                                                        | 13.6026(11)                                                                                           |
| <i>c</i> (Å)                                                       | 18.964(4)                                                             | 29.497(6)                                                                                    | 18.603(3)                                                                        | 24.391(2)                                                                                             |
| <i>α</i> (deg)                                                     | 90.0                                                                  | 90.0                                                                                         | 90.0                                                                             | 90.0                                                                                                  |
| <i>β</i> (deg)                                                     | 92.462(6)                                                             | 90.0                                                                                         | 90.0                                                                             | 90.0                                                                                                  |
| <i>γ</i> (deg)                                                     | 90.0                                                                  | 90.0                                                                                         | 90.0                                                                             | 90.0                                                                                                  |
| <i>V</i> (Å <sup>3</sup> )                                         | 2535.4(9)                                                             | 3918.6(14)                                                                                   | 3411.6(12)                                                                       | 3161.0(5)                                                                                             |
| <i>Z</i> value                                                     | 2                                                                     | 4                                                                                            | 4                                                                                | 4                                                                                                     |
| <i>D</i> <sub>calcd</sub> (g/cm <sup>3</sup> )                     | 1.434                                                                 | 1.315                                                                                        | 1.433                                                                            | 1.337                                                                                                 |
| <i>F</i> <sub>000</sub>                                            | 1128.00                                                               | 1592.00                                                                                      | 1504.00                                                                          | 1328.00                                                                                               |
| Temp (K)                                                           | 93                                                                    | 93                                                                                           | 93                                                                               | 93                                                                                                    |
| <i>μ</i> (MoK $\alpha$ ) (cm <sup>-1</sup> )                       | 8.620                                                                 | 5.808                                                                                        | 6.549                                                                            | 6.233                                                                                                 |
| No. of reflections<br>measured ( <i>R</i> <sub>int</sub> )         | 20054                                                                 | 36180                                                                                        | 14501                                                                            | 13914                                                                                                 |
| 2 $\theta$ <sub>max</sub> (deg)                                    | 55.0                                                                  | 55.0                                                                                         | 55.0                                                                             | 55.0                                                                                                  |
| No. of<br>observations [ <i>I</i> ><br>2.00 $\sigma$ ( <i>I</i> )] | 9289                                                                  | 8856                                                                                         | 13914                                                                            | 6154                                                                                                  |
| No. of variables                                                   | 572                                                                   | 457                                                                                          | 416                                                                              | 361                                                                                                   |
| <i>R</i> 1 [ <i>I</i> > 2.00 $\sigma$ ( <i>I</i> )]                | 0.0550                                                                | 0.0493                                                                                       | 0.0257                                                                           | 0.0262                                                                                                |
| <i>wR</i> 2 [All<br>reflections]                                   | 0.1442                                                                | 0.1229                                                                                       | 0.0649                                                                           | 0.0653                                                                                                |
| Goodness of Fit                                                    | 1.022                                                                 | 1.033                                                                                        | 1.047                                                                            | 1.142                                                                                                 |
